# Supplementary material for: Population-based comparison of chronic kidney disease prevalence and risk factors among adults living in the Punjab, Northern India and the USA (2013–2015)
Source: PubMed Central journal article supplement — BMJ Open. 2020 Dec 13;10(12):e040444. doi: 10.1136/bmjopen-2020-040444 (PMC7737106; doi:10.1136/bmjopen-2020-040444), 2020-12-13
Supplement: bmjopen-2020-040444.draft_revisions.pdf [file bmjopen-2020-040444.draft_revisions.pdf]

# BMJ Open

BMJ Open is committed to open peer review. As part of this commitment we make the peer review history of every article we publish publicly available.

When an article is published we post the peer reviewers' comments and the authors' responses online. We also post the versions of the paper that were used during peer review. These are the versions that the peer review comments apply to.

The versions of the paper that follow are the versions that were submitted during the peer review process. They are not the versions of record or the final published versions. They should not be cited or distributed as the published version of this manuscript.

BMJ Open is an open access journal and the full, final, typeset and author-corrected version of record of the manuscript is available on our site with no access controls, subscription charges or pay-per-view fees (<http://bmjopen.bmj.com>).

If you have any questions on BMJ Open's open peer review process please email [info.bmjopen@bmj.com](mailto:info.bmjopen@bmj.com)

# BMJ Open

## Very High Prevalence of Albuminuria among Adults in Northern India, Not Explained by Traditional Risk Factors: A Cause for Concern

|                               |                                                                                                                                                                                                                                                                                                                                                                                                                                                                                                                                                                                                                                                                                                                                                                                                                                                                                                     |
|-------------------------------|-----------------------------------------------------------------------------------------------------------------------------------------------------------------------------------------------------------------------------------------------------------------------------------------------------------------------------------------------------------------------------------------------------------------------------------------------------------------------------------------------------------------------------------------------------------------------------------------------------------------------------------------------------------------------------------------------------------------------------------------------------------------------------------------------------------------------------------------------------------------------------------------------------|
| Journal:                      | <i>BMJ Open</i>                                                                                                                                                                                                                                                                                                                                                                                                                                                                                                                                                                                                                                                                                                                                                                                                                                                                                     |
| Manuscript ID                 | bmjopen-2020-040444                                                                                                                                                                                                                                                                                                                                                                                                                                                                                                                                                                                                                                                                                                                                                                                                                                                                                 |
| Article Type:                 | Original research                                                                                                                                                                                                                                                                                                                                                                                                                                                                                                                                                                                                                                                                                                                                                                                                                                                                                   |
| Date Submitted by the Author: | 08-Jun-2020                                                                                                                                                                                                                                                                                                                                                                                                                                                                                                                                                                                                                                                                                                                                                                                                                                                                                         |
| Complete List of Authors:     | Bragg-Gresham, Jennifer ; University of Michigan Medical School, Internal Medicine - Division of Nephrology<br>Thakur, JS; Post Graduate Institute of Medical Education and Research, School of Public Health<br>Jeet, Gursimer; Post Graduate Institute of Medical Education and Research, School of Public Health<br>Jain, Sanjay; Post Graduate Institute of Medical Education and Research, School of Public Health<br>Pal, Arnab; Post Graduate Institute of Medical Education and Research, School of Public Health<br>Prasad , Rajendra; Post Graduate Institute of Medical Education and Research, School of Public Health<br>Pennathur, Subramaniam; University of Michigan Medical School, Internal Medicine - Division of Nephrology<br>Saran, Rajiv; University of Michigan School of Public Health, Internal Medicine and Molecular and Integrative Physiology, Division of Nephrology |
| Keywords:                     | EPIDEMIOLOGY, NEPHROLOGY, Adult nephrology < NEPHROLOGY                                                                                                                                                                                                                                                                                                                                                                                                                                                                                                                                                                                                                                                                                                                                                                                                                                             |
|                               |                                                                                                                                                                                                                                                                                                                                                                                                                                                                                                                                                                                                                                                                                                                                                                                                                                                                                                     |

SCHOLARONE™  
Manuscripts

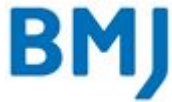

I, the Submitting Author has the right to grant and does grant on behalf of all authors of the Work (as defined in the below author licence), an exclusive licence and/or a non-exclusive licence for contributions from authors who are: i) UK Crown employees; ii) where BMJ has agreed a CC-BY licence shall apply, and/or iii) in accordance with the terms applicable for US Federal Government officers or employees acting as part of their official duties; on a worldwide, perpetual, irrevocable, royalty-free basis to BMJ Publishing Group Ltd ("BMJ") its licensees and where the relevant Journal is co-owned by BMJ to the co-owners of the Journal, to publish the Work in this journal and any other BMJ products and to exploit all rights, as set out in our [licence](#).

The Submitting Author accepts and understands that any supply made under these terms is made by BMJ to the Submitting Author unless you are acting as an employee on behalf of your employer or a postgraduate student of an affiliated institution which is paying any applicable article publishing charge ("APC") for Open Access articles. Where the Submitting Author wishes to make the Work available on an Open Access basis (and intends to pay the relevant APC), the terms of reuse of such Open Access shall be governed by a Creative Commons licence – details of these licences and which [Creative Commons](#) licence will apply to this Work are set out in our licence referred to above.

Other than as permitted in any relevant BMJ Author's Self Archiving Policies, I confirm this Work has not been accepted for publication elsewhere, is not being considered for publication elsewhere and does not duplicate material already published. I confirm all authors consent to publication of this Work and authorise the granting of this licence.

1  
2  
3 **Very High Prevalence of Albuminuria among Adults in Northern India, Not Explained by**  
4  
5 **Traditional Risk Factors: A Cause for Concern**  
6  
7  
8  
9

10 Jennifer Bragg-Gresham, PhD<sup>1</sup>; JS Thakur, MD<sup>2</sup>; Gursimer Jeet, PhD<sup>2</sup>, Sanjay Jain, MD<sup>2</sup>; Arnab  
11  
12 Pal, MD<sup>2</sup>; Rajendra Prasad, MD<sup>2</sup>; Subramaniam Pennathur, MD<sup>1</sup>; and Rajiv Saran<sup>1</sup>  
13  
14

- 15  
16  
17 1. Department of Internal Medicine - Nephrology, University of Michigan, Ann Arbor, MI,  
18  
19 USA  
20  
21 2. School of Public Health, Post Graduate Institute of Medical Education and Research,  
22  
23 Chandigarh-160012, India  
24  
25

26  
27  
28 **Corresponding Author:**  
29

30 Rajiv Saran, MD, MBBS, MD, MRCP, MS  
31  
32

33 1415 Washington Heights, 3645 SPH I  
34

35 Ann Arbor, MI 48109  
36

37 Email: rsaran@med.umich.edu  
38

39 Phone: (734) 764-6611 Fax: (734) 736-4004  
40  
41  
42  
43  
44

45 **Word Count (excluding title page, abstract, references, figures and tables): 2,898**  
46

47 **Key Words:** Chronic Kidney Disease, Albuminuria, India, Risk Factors  
48

49 **Running Headline:** CKD Prevalence in Punjab, India  
50  
51  
52  
53  
54  
55  
56  
57  
58  
59  
60

## ABSTRACT

**Objectives:** India is witnessing a disturbing growth in non-communicable diseases (NCDs), including chronic kidney disease (CKD). Recently, a WHO STEPS survey was conducted in the state of Punjab, India to collect data from the adult population on NCD risk factors. We sought to compare the prevalence of CKD and its risk factors between this large state in northern India and the United States.

**Setting:** Samples were drawn from both locations, Punjab, India and the US, using multi-stage stratified sampling designs to collect data representative of the general population.

**Participants:** Data from 2,002 participants in the Punjab survey (2014-2015) and 5,057 in the US (National Health and Nutrition Examination Survey (NHANES); 2013-2014), between the ages of 18-69 years were examined.

**Primary and secondary outcome measures:** Modified Poisson regression was employed to compare prevalence rates between the two countries for markers of CKD and its risk factors. All analyses used sampling weights.

**Results:** The average age in the Punjab sample was significantly lower than the US (38.3 vs. 42.5 years,  $p < 0.0001$ ). While smoking and obesity were higher in the US, hypertension was much more common in Punjab (48.2% vs. 33.4%,  $p < 0.0001$ ). Significant differences were seen in the prevalence of CKD, with lower prevalence of  $eGFR < 60 \text{ ml/min/1.73m}^2$  (2.0% vs. 3.8%,  $p < 0.0001$ ), but markedly higher prevalence of albuminuria (46.7% vs. 8.9%,  $p < 0.0001$ ) in Punjab. These differences could not be explained by traditional risk factors such as diabetes and hypertension.

**Conclusions:** We report a strikingly high prevalence of albuminuria in Punjab, India, compared with the United States. This requires further study and may have enormous public

1  
2  
3 health implications for future burden of progressive CKD, end stage renal disease, morbidity,  
4 mortality, and specifically for elevated risk or presence of cardiovascular disease in the northern  
5 state of Punjab, India.  
6  
7  
8  
9

10  
11  
12 Funding came from the National Health Mission, Punjab, India, JST and the Centers for Disease  
13 Control and Prevention, Atlanta, GA, USA.  
14  
15  
16  
17  
18

## 19 **STRENGTHS AND LIMITATIONS OF THIS STUDY**

### 23 **Strengths:**

- 24 • Representative Samples from both the State of Punjab, India and the United States
- 25 • Uniform laboratory testing for identification of kidney disease
- 26 • Comprehensive data collection on anthropomorphic measurements, laboratory  
27 measurements, comorbid conditions, and health behaviors

### 31 **Limitations:**

- 32 • Cross-sectional study design cannot establish causality
- 33 • Because the sample from India was only from one state, the Punjab, we cannot generalize  
34 our findings to all of India

## INTRODUCTION

The state of Punjab - indeed all of India, similar to other low and middle income countries (LMICs), is witnessing a disturbing growth in NCDs.[1] The country faces this epidemiologic transition while continuing to grapple with the problem of communicable diseases, which still remain a significant burden.[2] With this knowledge, the Department of Health and Family Welfare in Punjab, India, worked closely with the Post Graduate Institute of Medical Education and Research, Chandigarh, India, and medical colleges in the state to conduct the first representative survey of NCDs in the state of Punjab in 2014 and 2015.

The goal of this survey was to collect critical and up to date data on risk factors for NCDs in Punjab, with the hope of improving health planning and implementation of state initiatives, such as the National Program for Prevention and Control of Cancer, Diabetes, Cardiovascular disease and Stroke (NPCDCS).[3] This survey provides a wealth of data on both risk factors for kidney disease and kidney disease itself, comparable to data collected in the United States from the National Health and Nutrition Examination Survey (NHANES).

Previous work utilizing data from this source have shown an alarmingly high prevalence of hypertension (40.1%) and pre-hypertension (40.8%) in the region, with approximately 70% of these individuals being unaware of their condition.[4] Similarly, although less prevalent, diabetes was found in 8.3% (6.3% with pre-diabetes) participants, with only 18% of individuals being aware of their disease.[5] Since diabetes and hypertension are two of the key risk factors for kidney disease, we hypothesized that the state of Punjab may be experiencing or on the verge of experiencing a significant burden of kidney disease.

Therefore, in the current study we sought to examine the prevalence of CKD (both low glomerular filtration rate and albuminuria) and risk factors for CKD, comparing the Punjab to a

1  
2  
3 representative sample of individuals from the US National Health and Nutrition Examination  
4 Survey (NHANES). In addition, we also sought to compare the magnitude of the associations  
5  
6 between risk factors and CKD in the two countries.  
7  
8  
9

## 10 11 12 **MATERIALS AND METHODS** 13 14

### 15 16 **Study Sample** 17 18

19 The STEPS survey of non-communicable disease (NCD) risk factors was carried out  
20 from June 2014 to August 2015 in Punjab.[3] A multi-stage stratified sampling design was used  
21 to generate representative data for two age-groups (18-44, 45-69), sex, and area of residence in  
22 the state. A total of 5,127 adults, ages 18-69 years, participated in the survey. The overall  
23 response rate for STEP1/2 and STEP 3 was 95% and 93% respectively. Data were collected in  
24 three steps: Socio-demographic and behavioral information was collected in Step 1, physical  
25 measurements such as height, weight and blood pressure were done in Step 2, and biochemical  
26 measurements were undertaken to assess salt intake, blood glucose, triglycerides and cholesterol  
27 levels in Step 3. This analysis included individuals from STEP 3 of the survey, which was  
28 carried out in a subset of 2700 participants. A total of 2,002 individuals who had complete data  
29 on both albuminuria and serum creatinine were analyzed. Specific sample weights were available  
30 for the individuals included in STEP 3.  
31  
32  
33  
34  
35  
36  
37  
38  
39  
40  
41  
42  
43  
44  
45

46 The US data for comparison were from the 2013-2014 National Health and Nutrition  
47 Examination Survey (NHANES), included 5,057 individuals. Multi-stage stratified sampling  
48 design was used to collect data representative of the US general population.[6] The NHANES is  
49 supported by the National Center for Health Statistics and was designed to assess the health and  
50 nutritional status of adults and children in the United States. The study combines interviews,  
51  
52  
53  
54  
55  
56  
57  
58  
59  
60



1  
2  
3 physical examinations, laboratory tests, and participant lifestyle surveys. Individuals between the  
4  
5 ages of 18 and 69 years, with complete information on estimated glomerular filtration rate and  
6  
7 albuminuria, were examined to match with the Punjab sample.  
8  
9  
10  
11  
12

## 13 **Patient and Public Involvement**

14  
15  
16 The research question was assessed using existing data taken from large, representative  
17  
18 surveys, which contained more health questions and health measures than those presented in this  
19  
20 work. The aim of the larger studies were to assess the overall health of each region, focused on  
21  
22 diseases of global health impact, rather than individual patient priorities. The NHANES program  
23  
24 began in the early 1960s, as a series of surveys focusing on different population groups or health  
25  
26 topics over time. Participants were not involved in the design of the study, recruitment, or  
27  
28 conduct of the study. NHANES participants receive their results from their examination as a  
29  
30 preliminary report when leaving the exam center. A final report of findings is sent to each  
31  
32 participant through the mail 12-16 weeks after their exam. Patients are free to discuss their  
33  
34 results with their doctor and to keep for their own medical records.  
35  
36  
37  
38

39 Similarly, the Punjab STEPS survey was a state-level public health effort undertaken to  
40  
41 estimate the burden of many non-communicable diseases in that region. The government funded  
42  
43 study, similar to NHANES did not enlist patient opinion during study design, but did have a plan  
44  
45 to provide results to patients if abnormal and warranting medical follow-up.  
46  
47  
48  
49  
50

## 51 **Measures**

1  
2  
3 Kidney function was assessed by estimated glomerular filtration rate (eGFR), calculated  
4 with using the CKD-Epi formula in both samples, employing the coefficients for White race in  
5 India.[7] Albuminuria was defined as a urine albumin to creatinine ratio (UACR) > 30 mg/g.  
6  
7 Kidney disease was also assessed using the KDIGO risk categories, which places individuals into  
8 four risk groups for mortality based on their eGFR and UACR levels (low risk: eGFR > 60 and  
9 UACR < 30; moderately high risk: eGFR 45-59 with UACR < 30 or eGFR > 60 with UACR 30-  
10 300; high risk: eGFR 30-44 with UACR < 30, eGFR 45-59 with UACR 30-300, or eGFR > 60  
11 with UACR > 300; or very high risk: eGFR < 30, eGFR 30-44 with UACR > 30, or eGFR 45-59  
12 with UACR > 300).[8]

13  
14 Risk factors for kidney disease were defined similarly between the two samples. Diabetes  
15 was defined by presence of any of the following: being told by a doctor they had diabetes or  
16 taking medication for diabetes (including medication from traditional healers in India).  
17 Hypertension was defined as any of the following: being told by a doctor they had hypertension,  
18 taking medications for hypertension, or having systolic blood pressure (SBP) > 140mmHg or  
19 diastolic blood pressure (DBP) > 90mmHg.

20  
21 Different cut-points for identifying obesity were used between countries to account for  
22 the differences in stature. In the US, the WHO definition was employed where underweight was  
23 defined as BMI < 18.5, normal weight as BMI 18.5 – 24.99, overweight as BMI 25 – 29.99, and  
24 obese as BMI  $\geq$  30 kg/m<sup>2</sup>. In Punjab obesity was defined using the same criteria as other  
25 published papers using this survey data with underweight being defined as BMI < 18.5, normal  
26 weight as BMI 18.5 – 22.99, overweight as BMI 23 – 26.99, and obese as BMI  $\geq$  27 kg/m<sup>2</sup>. [1-3]

## 27 28 29 30 31 32 33 34 35 36 37 38 39 40 41 42 43 44 45 46 47 48 49 50 51 52 53 54 **Statistical Analysis**

1  
2  
3 Demographic, socio-economic, anthropometric, health status, and markers of kidney  
4 disease were compared between counties using sample weighted t-tests or Chi-square tests.  
5  
6 Associations between patient characteristics and risk factors for kidney disease with laboratory  
7 markers of kidney disease were modeled using modified Poisson regression with robust errors.  
8 This modeling approach was chosen, as opposed to logistic regression, because it yields  
9 estimates of prevalence ratios (PRs), rather than odds ratios.[9,10] PR estimates were determined  
10 for the kidney disease risk factors within each country using interactions between a country  
11 indicator variable and each measure.  
12  
13  
14  
15  
16  
17  
18  
19  
20

21 Analysis of de-identified data received from the Punjab WHO Steps Survey for this study  
22 was deemed IRB exempt by the University of Michigan IRB. NHANES data is publically  
23 available for use by researchers and does not require an IRB approval.  
24  
25  
26  
27  
28  
29  
30

## 31 RESULTS

32  
33  
34  
35 Many differences exist between individuals in Punjab and the US, as shown in Table 1.  
36  
37 The mean age was approximately four years younger in Punjab ( $p<0.0001$ ), with a higher  
38 proportion of men (58.2% vs. 48.9%,  $p<0.0001$ ) compared with the US. The US had a much  
39 higher percentage of both high school or higher education and private health insurance coverage  
40 ( $p<0.0001$ ). Overall body size was very different, with Punjab residents being 6 cm shorter,  
41 weighing 18 kilograms less, having 10 cm smaller waist circumference, and BMI lower by 4.6  
42  $\text{kg/m}^2$  (all  $p<0.0001$ ). Comparison of obesity by categories showed a higher percentage of  
43 individuals in Punjab as underweight (11.3% vs. 1.5% in the US) and a higher proportion of  
44 obese individuals in the US (37.9% vs. 28.9%,  $p<0.0001$ ), while proportions of those in the  
45 normal or overweight categories were very similar. While smoking was higher in the US,  
46  
47  
48  
49  
50  
51  
52  
53  
54  
55  
56  
57  
58  
59  
60

hypertension was much more common in Punjab (48.2% vs. 33.4%,  $p < 0.0001$ ). No differences were seen in the prevalence of diabetes, cardiovascular disease, or triglyceride levels, although the US had higher total cholesterol levels (4.9 vs. 3.9 mmol/L [189 vs. 150 mg/dL] in Punjab,  $p < 0.0001$ ).

**Table 1: Comparison of Weighted Survey Sample Participant Characteristics between the Adult Populations in the State of Punjab, India and the United States**

| Measure                               | Punjab (2014-2015) |                | US (2013-2014) |                | P value |
|---------------------------------------|--------------------|----------------|----------------|----------------|---------|
|                                       | N                  | Mean (SE) or % | N              | Mean (SE) or % |         |
| Age (years)                           | 2,002              | 38.3 (0.60)    | 5,057          | 42.5 (0.38)    | <0.0001 |
| Male (%)                              | 2,002              | 58.2%          | 5,057          | 48.9%          | 0.0001  |
| Education to high school or above (%) | 2,002              | 43.4%          | 4,718          | 85.3%          | <0.0001 |
| Health Insurance (%)                  | 2,002              | 6.2%           | 5,052          | 79.8%          | <0.0001 |
| Height (cm)                           | 1,986              | 163.0 (0.37)   | 5,008          | 169.0 (0.31)   | <0.0001 |
| Weight (Kg)                           | 1,993              | 65.4 (0.6)     | 5,006          | 83.5 (0.54)    | <0.0001 |
| BMI (kg/m <sup>2</sup> ) *            | 1,982              | 24.6 (0.23)    | 5,000          | 29.2 (0.20)    | <0.0001 |
| Underweight                           | 1,982              | 11.3           | 5,000          | 1.5            | <0.0001 |
| Normal                                |                    | 29.5           |                | 29.1           |         |
| Overweight                            |                    | 30.3           |                | 31.5           |         |
| Obese                                 |                    | 28.9           |                | 37.9           |         |
| Waist (cm)                            | 1,995              | 89.0 (0.62)    | 4,836          | 98.8 (0.38)    | <0.0001 |
| Current smoker (%)                    | 2,002              | 7.5%           | 5,057          | 21.6%          | <0.0001 |
| Diabetes (%)                          | 1,043              | 7.7%           | 5,057          | 8.9%           | 0.42    |
| Hypertension (%)                      | 2,000              | 48.2%          | 5,057          | 33.4%          | <0.0001 |
| CVD (%)                               | 1,989              | 4.6%           | 5,057          | 3.4%           | 0.08    |
| Triglyceride (mmol/L)                 | 2,001              | 1.4 (0.04)     | 2,294          | 1.4 (0.04)     | 0.35    |
| Total cholesterol (mmol/L)            | 2,002              | 3.9 (0.06)     | 4,812          | 4.9 (0.02)     | <0.0001 |
| Creatinine (µmol/L)                   | 2,002              | 0.70 (0.01)    | 4,798          | 0.88 (0.01)    | <0.0001 |
| eGFR (mL/min/1.73m <sup>2</sup> )     | 2,002              | 114.8 (1.1)    | 4,798          | 97.8 (0.6)     | <0.0001 |
| ACR (mg/mmol; median)                 | 1,928              | 2.5 (0.25)     | 4,971          | 0.66 (0.07)    | <0.0001 |
| eGFR < 60 ml/min/1.73m <sup>2</sup>   | 2,002              | 2.0%           | 4,798          | 3.8%           | <0.0001 |
| ACR > 3 mg/mmol                       | 1,928              | 46.7%          | 4,971          | 8.9%           | <0.0001 |

1  
2  
3 Although Punjab had a lower prevalence of eGFR < 60 ml/min/1.73m<sup>2</sup> (2.0% vs. 3.8%,  
4 p<0.0001), the prevalence of albuminuria was five times higher (46.7% vs. 8.9%, p<0.0001).  
5  
6  
7 When assessing kidney function using the KDIGO risk categories (Table 2), the high prevalence  
8 of high UACR lead to 46.2% of participants in Punjab being classified as “moderately high risk”,  
9 compared to only 9.1% in the US. In contrast, Punjab had only 1.4% in the “high risk” or  
10 “extremely high risk” groups compared to 2.1% in the US (Figure 1).  
11  
12  
13  
14  
15  
16  
17  
18  
19  
20  
21  
22  
23  
24  
25  
26  
27  
28  
29  
30  
31  
32  
33  
34  
35  
36  
37  
38  
39  
40  
41  
42  
43  
44  
45  
46  
47  
48  
49  
50  
51  
52  
53  
54  
55  
56  
57  
58  
59  
60

Table 2: Prevalence of Albuminuria and eGFR KDIGO Risk Categories among Adults in Punjab and United States

| Punjab, India                                                |     |                         |       | Albuminuria categories     |                             |                          | Total |
|--------------------------------------------------------------|-----|-------------------------|-------|----------------------------|-----------------------------|--------------------------|-------|
|                                                              |     |                         |       | A1                         | A2                          | A3                       |       |
|                                                              |     |                         |       | Normal to mildly increased | Moderately increased        | Severely increased       |       |
|                                                              |     |                         |       | <30 mg/g<br><3 mg/mmol     | 30-300 mg/g<br>3-30 mg/mmol | >300 mg/g<br>>30 mg/mmol |       |
| GFR categories <sup>2</sup><br>(ml/min/1.73 m <sup>2</sup> ) | G1  | Normal to high          | ≥90   | 46.7                       | 42.0                        | 0.2                      | 88.9  |
|                                                              | G2  | Mildly decreased        | 60-89 | 5.7                        | 3.5                         | 0                        | 9.2   |
|                                                              | G3a | Mildly to mod decreased | 45-59 | 0.7                        | 0.5                         | 0                        | 1.2   |
|                                                              | G3b | Mod to severe decreased | 30-44 | 0.3                        | 0.5                         | 0                        | 0.8   |
|                                                              | G4  | Severely decreased      | 15-29 | 0.03                       | 0.01                        | 0                        | 0.04  |
|                                                              | G5  | Kidney failure          | <15   | 0                          | 0                           | 0                        | 0     |
| <b>Total</b>                                                 |     |                         |       | 53.4                       | 46.5                        | 0.2                      | 100   |

  

| United States                                                |     |                         |       | Albuminuria categories     |                             |                          | Total |
|--------------------------------------------------------------|-----|-------------------------|-------|----------------------------|-----------------------------|--------------------------|-------|
|                                                              |     |                         |       | A1                         | A2                          | A3                       |       |
|                                                              |     |                         |       | Normal to mildly increased | Moderately increased        | Severely increased       |       |
|                                                              |     |                         |       | <30 mg/g<br><3 mg/mmol     | 30-300 mg/g<br>3-30 mg/mmol | >300 mg/g<br>>30 mg/mmol |       |
| GFR categories <sup>2</sup><br>(ml/min/1.73 m <sup>2</sup> ) | G1  | Normal to high          | ≥90   | 60.7                       | 4.8                         | 0.5                      | 66.0  |
|                                                              | G2  | Mildly decreased        | 60-89 | 28.1                       | 2.2                         | 0.1                      | 30.4  |
|                                                              | G3a | Mildly to mod decreased | 45-59 | 2.1                        | 0.4                         | 0.2                      | 2.7   |
|                                                              | G3b | Mod to severe decreased | 30-44 | 0.3                        | 0.2                         | 0.1                      | 0.6   |
|                                                              | G4  | Severely decreased      | 15-29 | 0.05                       | 0.05                        | 0.09                     | 0.2   |
|                                                              | G5  | Kidney failure          | <15   | 0                          | 0.06                        | 0.07                     | 0.1   |
| <b>Total</b>                                                 |     |                         |       | 91.2                       | 7.7                         | 1.1                      | 91.3  |

1  
2  
3 To compare the magnitude of association between traditional risk factors for CKD  
4  
5 between the two countries, we modeled prevalence ratios in each country within one model to  
6  
7 allow for the associations to be compared statistically (Table 3). When examining low eGFR (<  
8  
9 60 ml/min/1.73m<sup>2</sup>) as the outcome, male participants in Punjab showed a much lower prevalence  
10  
11 compared with females (prevalence ratio: PR=0.22, p=0.007); while no association was seen in  
12  
13 the US between sex and low eGFR (PR=1.09, p=0.56). These associations were significantly  
14  
15 different from each other with p=0.006. Another difference between the associations and  
16  
17 outcome was seen for hypertension (p=0.008), where a non-significant lower prevalence ratio  
18  
19 was observed in Punjab (PR=0.75, p=0.43) and a strong positive association was seen in the US  
20  
21 (PR=2.24, p<0.0001). Similar positive associations were seen in both countries for older age,  
22  
23 higher education level, CVD, and DM on the prevalence of low eGFR.  
24  
25  
26  
27

28 Table 3b displays the associations between patient factors and the prevalence of  
29  
30 albuminuria. Significant differences between the countries was again seen with sex and the  
31  
32 outcome (p=0.02). No association between sex and albuminuria was seen in Punjab, where in the  
33  
34 US males had a lower prevalence of albuminuria (PR=0.77, p=0.004). While in both countries  
35  
36 hypertension and DM were associated with a higher prevalence of albuminuria, the magnitude of  
37  
38 association was much stronger in the US (PR=1.19 in Punjab vs. PR=1.93 in the US for  
39  
40 hypertension and PR=1.32 in Punjab vs. PR=2.54 in the US for DM). Current smoking was  
41  
42 associated with albuminuria only in the US (PR=1.34, p=0.002), while higher total cholesterol  
43  
44 was associated with albuminuria in the Punjab (PR=1.11 per 0.5 mmol/L higher total  
45  
46 cholesterol).  
47  
48  
49  
50  
51  
52  
53  
54  
55  
56  
57  
58  
59  
60

When combining low eGFR and albuminuria into a composite (CKD) outcome (Table 3c) more differences were found between the countries in certain associations. Significantly larger associations were found in the US for the relationship between older age, hypertension, DM, and BMI; while a larger association was seen between total cholesterol and the composite CKD measure in the Punjab.

**Table 3: Prevalence Ratios for Markers of CKD by Risk Factors**

A. Low eGFR (eGFR < 60 ml/min/1.73m<sup>2</sup>)

| Measure                                          | Punjab |             |        | US   |             |         | P-value for interaction |
|--------------------------------------------------|--------|-------------|--------|------|-------------|---------|-------------------------|
|                                                  | PR     | 95% CI      | P      | PR   | 95% CI      | P       |                         |
| Age (per 10 years)                               | 1.73   | 1.29 – 2.31 | 0.0002 | 2.14 | 1.82 – 2.52 | <0.0001 | 0.20                    |
| Male (vs. Female)                                | 0.22   | 0.07 – 0.66 | 0.007  | 1.09 | 0.81 – 1.47 | 0.56    | <b>0.006</b>            |
| Education high school + (vs. no)                 | 1.86   | 0.84 – 4.10 | 0.13   | 1.53 | 1.06 – 2.20 | 0.02    | 0.66                    |
| Current smoker (vs. no)                          | 2.32   | 0.31 – 1.74 | 0.41   | 0.92 | 0.63 – 1.34 | 0.66    | 0.38                    |
| Hypertension (vs. no)                            | 0.75   | 0.37 – 1.52 | 0.43   | 2.24 | 1.51 – 3.33 | <0.0001 | <b>0.008</b>            |
| DM (vs. no)                                      | 2.75   | 1.17 – 6.48 | 0.02   | 1.76 | 1.27 – 2.44 | 0.0007  | 0.34                    |
| CVD (vs. no)                                     | 1.11   | 0.34 – 3.60 | 0.87   | 1.98 | 1.20 – 1.38 | 0.0002  | 0.35                    |
| Total Cholesterol (per 20 mg/dl, per 0.5 mmol/L) | 1.09   | 0.73 – 1.64 | 0.67   | 0.92 | 0.76 – 1.11 | 0.36    | 0.44                    |
| BMI (per 5 Kg/m <sup>2</sup> )                   | 0.82   | 0.59 – 1.15 | 0.25   | 1.13 | 1.04 – 1.23 | 0.006   | 0.07                    |
| Obesity:                                         |        |             |        |      |             |         |                         |
| Underweight                                      | 1.24   | 0.26 – 5.95 | 0.79   | 1.45 | 0.36 – 5.89 | 0.60    | 0.88                    |
| Healthy weight                                   | 1.00   | -           | ref    | 1.00 | -           | ref     |                         |
| Overweight                                       | 2.63   | 1.09 – 6.34 | 0.03   | 1.31 | 0.83 – 2.07 | 0.25    | 0.17                    |
| Obese                                            | 0.73   | 0.27 – 1.95 | 0.53   | 1.40 | 0.91 – 2.14 | 0.13    | 0.23                    |



## B. Albuminuria (ACR &gt; 30 mg/g, 3 mg/mmol)

| Measure                                          | Punjab |             |        | US   |             |         | P-value for interaction |
|--------------------------------------------------|--------|-------------|--------|------|-------------|---------|-------------------------|
|                                                  | PR     | 95% CI      | P      | PR   | 95% CI      | P       |                         |
| Age (per 10 years)                               | 1.03   | 0.99 – 1.08 | 0.16   | 1.06 | 0.98 – 1.14 | 0.15    | 0.60                    |
| Male (vs. Female)                                | 0.99   | 0.88 – 1.12 | 0.93   | 0.77 | 0.65 – 0.92 | 0.004   | <b>0.02</b>             |
| Education high school + (vs. no)                 | 0.99   | 0.88 – 1.11 | 0.80   | 0.81 | 0.67 – 0.98 | 0.03    | 0.09                    |
| Current smoker (vs. no)                          | 1.09   | 0.85 – 1.40 | 0.48   | 1.35 | 1.11 – 1.63 | 0.002   | 0.20                    |
| Hypertension (vs. no)                            | 1.19   | 1.06 – 1.34 | 0.005  | 1.93 | 1.59 – 2.36 | <0.0001 | <b>&lt;0.0001</b>       |
| DM (vs. no)                                      | 1.32   | 1.12 – 1.56 | 0.0008 | 2.54 | 2.07 – 3.13 | <0.0001 | <b>&lt;0.0001</b>       |
| CVD (vs. no)                                     | 1.14   | 0.92 – 1.37 | 0.24   | 1.32 | 1.16 – 0.99 | 0.06    | 0.37                    |
| Total Cholesterol (per 20 mg/dl, per 0.5 mmol/L) | 1.11   | 1.04 – 1.17 | 0.001  | 0.99 | 0.90 – 1.09 | 0.81    | <b>0.05</b>             |
| BMI (per 5 Kg/m <sup>2</sup> )                   | 0.99   | 0.94 – 1.03 | 0.54   | 1.04 | 0.98 – 1.10 | 0.19    | 0.16                    |
| Obesity:                                         |        |             |        |      |             |         |                         |
| Underweight                                      | 0.90   | 0.72 – 1.11 | 0.32   | 1.20 | 0.56 – 2.56 | 0.64    | 0.47                    |
| Healthy weight                                   | 1.00   | -           | ref    | 1.00 | -           | ref     | -                       |
| Overweight                                       | 0.95   | 0.82 – 1.10 | 0.48   | 0.93 | 0.72 – 1.18 | 0.53    | 0.85                    |
| Obese                                            | 0.95   | 0.83 – 1.09 | 0.48   | 1.01 | 0.80 – 1.27 | 0.96    | 0.68                    |

## C. CKD (low eGFR or Albuminuria)

| Measure                                          | Punjab |             |        | US   |             |         | P-value for interaction |
|--------------------------------------------------|--------|-------------|--------|------|-------------|---------|-------------------------|
|                                                  | PR     | 95% CI      | P      | PR   | 95% CI      | P       |                         |
| Age (per 10 years)                               | 1.04   | 1.00 – 1.09 | 0.06   | 1.20 | 1.12 – 1.29 | <0.0001 | <b>0.0007</b>           |
| Male (vs. Female)                                | 0.97   | 0.86 – 1.09 | 0.58   | 0.81 | 0.70 – 0.94 | 0.007   | 0.0686                  |
| Education high school + (vs. no)                 | 1.00   | 0.90 – 1.12 | 0.96   | 0.91 | 0.77 – 1.09 | 0.31    | 0.379                   |
| Current smoker (vs. no)                          | 1.09   | 0.85 – 1.40 | 0.49   | 1.26 | 1.06 – 1.49 | 0.008   | 0.3526                  |
| Hypertension (vs. no)                            | 1.18   | 1.05 – 1.33 | 0.006  | 1.87 | 1.57 – 2.23 | <0.0001 | <b>&lt;0.0001</b>       |
| DM (vs. no)                                      | 1.35   | 1.16 – 1.58 | 0.0002 | 2.11 | 1.77 – 2.53 | <0.0001 | <b>0.0002</b>           |
| CVD (vs. no)                                     | 1.13   | 0.94 – 1.37 | 0.19   | 1.49 | 1.12 – 1.18 | 0.0006  | 0.072                   |
| Total Cholesterol (per 20 mg/dl, per 0.5 mmol/L) | 1.09   | 1.04 – 1.16 | 0.002  | 0.97 | 0.88 – 1.05 | 0.41    | <b>0.02</b>             |
| BMI (per 5 Kg/m <sup>2</sup> )                   | 0.98   | 0.94 – 1.03 | 0.48   | 1.06 | 1.01 – 1.12 | 0.017   | <b>0.025</b>            |
| Obesity:                                         |        |             |        |      |             |         |                         |
| Underweight                                      | 0.89   | 0.72 – 1.10 | 0.28   | 1.31 | 0.67 – 2.54 | 0.43    | 0.28                    |
| Healthy weight                                   | 1.00   | -           | ref    | 1.00 | -           | ref     | -                       |
| Overweight                                       | 0.98   | 0.86 – 1.13 | 0.81   | 0.98 | 0.79 – 1.22 | 0.84    | 0.97                    |
| Obese                                            | 0.95   | 0.83 – 1.09 | 0.48   | 1.06 | 0.86 – 1.29 | 0.60    | 0.41                    |

Figure 2 displays the changes in prevalence ratios comparing US to Punjab for each marker of CKD with different levels of adjustment for traditional risk factors examined in Table 3. Before accounting for any differences in participants in the two studies, the prevalence of low eGFR was much higher in the US (PR=2.16), but after accounting for demographics and other health measures, the US has a much lower prevalence of low eGFR compared to Punjab (PR=0.13, and 0.05, respectively), suggesting that if the US had the same patient make up as Punjab, the prevalence of low eGFR would be much lower. The findings for albuminuria and any CKD

1  
2  
3 were very similar in showing that before adjustment the prevalence of either marker was much  
4 lower in the US (PR=0.24 and 0.29, respectively) and accounting for difference in demographics  
5 and health measures between the countries changed these estimates very little. These results  
6 suggest that traditional risk factors do not entirely explain the difference in prevalence seen  
7 among markers of kidney disease between the US and Punjab.  
8  
9  
10  
11  
12  
13  
14  
15  
16

## 17 **DISCUSSION**

18  
19  
20 In comparing two representative samples of patients from the adult population of Punjab,  
21 India and the United States, we found a very high prevalence of albuminuria in the Punjab, with  
22 almost half of the residents with urine ACR > 3 mg/mmol (30 mg/g). This is in contrast to the  
23 prevalence of albuminuria in the US of approximately 9%. When examining glomerular filtration  
24 rate, the Punjab had much higher average eGFR and a lower prevalence of eGFR < 60  
25 ml/min/1.73m<sup>2</sup> (2.0% vs. 3.8%). Because of the high prevalence of albuminuria in the Punjab,  
26 almost half the population falls into the “moderately high risk” CKD risk category per KDIGO  
27 risk stratification criteria. Even more striking is the fact that the between country differences in  
28 the prevalence estimates of albuminuria could not be explained by traditional risk factors for  
29 CKD, such as age, hypertension, and diabetes.  
30  
31  
32  
33  
34  
35  
36  
37  
38  
39  
40  
41  
42

43 If true, these findings have enormous public health and resource implications for a low-  
44 middle income country such as India, specifically in the realm of CKD, cardiovascular disease  
45 and other NCDs. Currently there are no definitive estimates of prevalence of chronic kidney  
46 disease in India, as there is no ongoing national kidney registry/surveillance system. Recent  
47 publications have suggested that 220,000 patients are diagnosed with ESRD every year.[11] It is  
48 estimated that this will result in demand for an additional 34 million dialysis sessions in India  
49  
50  
51  
52  
53  
54  
55  
56  
57  
58  
59  
60

1  
2  
3 each year. Besides the growing population of patients with kidneys disease, the country is faced  
4  
5 with a shortage of nephrologists, late referral of patients, inadequate health awareness about  
6  
7 preventive measures, and a lack of more cost-effective alternatives like renal transplantation or  
8  
9 peritoneal dialysis (PD).[11] It has been estimated that 70% of those who start dialysis in India  
10  
11 eventually give up dialysis due to financial constraints or death.[12] The health care system, with  
12  
13 most out-of-pocket expenditures borne by the households pose significant barriers to accessing  
14  
15 health services with approximately 60 million households pushed below the poverty line in India  
16  
17 as a result each year.[13]  
18  
19  
20

21  
22 Although not to the same degree, we reported similar findings in a recent study  
23  
24 comparing CKD between China in the US.[14] China, another country which has gone through  
25  
26 great economic and population growth in recent years, displayed a low prevalence of advanced  
27  
28 kidney disease (eGFR < 60 ml/min/1.73m<sup>2</sup>), but a higher prevalence of albuminuria than the US.  
29  
30 The strength of association between traditional risk factors, such as hypertension and diabetes,  
31  
32 were also weaker among the Chinese sample, although the association between age and CKD  
33  
34 prevalence was much stronger.  
35  
36

37  
38 One explanation for these findings in India may be that nontraditional factors are driving  
39  
40 this very high rate of early stage kidney disease. The evidence linking kidney disease to  
41  
42 environmental factors continues to grow. Air pollution is one area that has been examined in  
43  
44 depth recently in terms of its potential role in kidney disease. In the US, PM2.5 levels have been  
45  
46 linked to the prevalence of CKD, risk of incident CKD, and its progression.[15,16] This  
47  
48 association is also being explored outside the US with findings published from Taiwan and  
49  
50 Korea showing similar results.[17-19] India currently has some of the highest levels of air  
51  
52 pollution in the world. It is estimated that 1.5 million people died from the effects of air pollution  
53  
54  
55  
56  
57  
58  
59  
60

1  
2  
3 in 2012.[20,21] While less studied, it is also plausible that kidney disease may be influenced by  
4  
5 pollutants in both the water and soil as well, similar to the factors potentially underlying the  
6  
7 epidemic of CKD of unknown etiology.[22]  
8  
9

10 Unless actions are undertaken now to further investigate and reduce the high rate of  
11  
12 albuminuria (albeit based on single cross-sectional estimates) reported in this study, the  
13  
14 infrastructure and economy in India will likely not be able to optimally care for an increasing  
15  
16 burden of those who may progress to ESRD in the not too distant future. Further, since  
17  
18 albuminuria is also a marker of endothelial dysfunction and has been linked to cardiovascular  
19  
20 outcomes, even at low levels, the higher risk of premature cardiovascular disease needs to be  
21  
22 kept in mind in relation to albuminuria.[23-25]  
23  
24  
25

26 To the best of our knowledge, this is the first study to estimate kidney disease prevalence  
27  
28 at state level in India based on a random sample of the adult population living in a large,  
29  
30 populous, northern Indian state. Further, it is also the first to compare prevalence of CKD  
31  
32 between India and the US (after adjusting for patient characteristics around the same time period  
33  
34 in the two nations). However, it is not without limitations. Because the sample from India was  
35  
36 only from one state, the Punjab, we cannot generalize our findings to all of India. Although this  
37  
38 is a large state, the risk factor distribution and prevalence could be different in other areas of the  
39  
40 country.[26] In addition, the people, land and environment in India are diverse and of a highly  
41  
42 variegated nature with significant urban-rural differences. It should also be acknowledged that  
43  
44 the Punjab STEPS survey is cross-sectional in design and while appropriately sampled to be  
45  
46 representative of the state, may be limited by its sample size. Lastly, both NHANES and the  
47  
48 Punjab STEPS survey checked albuminuria and serum creatinine at a single point in time,  
49  
50  
51 whereas the KDIGO definition of CKD requires demonstration of persistence of these  
52  
53  
54  
55  
56  
57  
58  
59  
60

1  
2  
3 abnormalities. We believe however, that repeat sampling of blood and urine in public health  
4 surveys, while highly desirable, is often difficult to achieve in the real world.  
5  
6

7  
8 Future research examining the association between environmental factors and kidney  
9 disease in India is urgently warranted. Such studies would benefit from having population  
10 samples from multiple states, preferably be longitudinal in nature, and have the potential to  
11 examine multiple environmental factors, while accounting for the traditional risk factors for  
12 kidney disease.  
13  
14  
15  
16  
17  
18

19 In summary, we report very high prevalence of albuminuria in a large state (the Punjab)  
20 in northern India. Albuminuria is considered an early sign of kidney damage as well as may  
21 reflect endothelial dysfunction, a harbinger of atherosclerosis-related cardiovascular disease.  
22 Progression of this early stage kidney and cardiovascular disease elevates the potential for an  
23 epidemic of ESRD and higher rates of cardiovascular disease in a country undergoing rapid  
24 epidemiologic and economic transition. Urgent action and further research is needed to  
25 determine the underlying cause(s) of these findings, in the hopes of stemming the tide of rising  
26 rates of kidney failure and cardiovascular disease. India must clearly prepare for an inevitable  
27 increase in the need for renal replacement therapy in the coming years.  
28  
29  
30  
31  
32  
33  
34  
35  
36  
37  
38  
39  
40  
41  
42  
43  
44  
45  
46  
47  
48  
49  
50  
51  
52  
53  
54  
55  
56  
57  
58  
59  
60

## COMPETING INTERESTS:

**Jennifer L. Bragg-Gresham:** None

**JS Thakur:** None

**Gursimer Jeet:** None

**Sanjay Jain:** None

**Arnab Pal:** None

**Rajendra Prasad:** None

**Subramaniam Pennathur:** None

**Rajiv Saran:** None

## CONTRIBUTION STATEMENT:

**Jennifer L. Bragg-Gresham:** Data analysis, manuscript writing, tables/figures creation

**JS Thakur:** Study design (India), data collection, manuscript planning, manuscript review and editing

**Gursimer Jeet:** Study design, data collection and programming, manuscript review and editing

**Sanjay Jain:** Study design, manuscript review and editing

**Arnab Pal:** Study design, manuscript review and editing

**Rajendra Prasad:** Study design, manuscript review and editing

**Subramaniam Pennathur:** Manuscript review and editing

**Rajiv Saran:** Manuscript planning, manuscript writing, manuscript review and editing

## FUNDING SOURCES AND ACKNOWLEDGEMENTS

**Punjab:** We appreciate the support from Department of Health and Family welfare, Punjab especially Professor. KK Talwar, Advisor (Health), Government of Punjab, Ms. Vini Mahajan, IAS, Principal Secretary, Department of Health and Family Welfare and Mr. Hussan Lal, IAS, Secretary, Medical Education and Mission Director, National Health Mission, Punjab for their guidance and support for the project in conducting the study. Contributions by Biosense Pvt. Limited are acknowledged. We would like to thanks the members of Technical Advisory Committee and chairperson Prof. SK Jindal who provided technical oversight for the designing and implementation of survey. In addition inputs from advisors from University of Michigan were valuable. We sincerely acknowledge the financial support by National Health Mission (Punjab), Ministry of Health and Family Welfare, Government of India and technical support of WHO with special thanks to Dr. Dharendra N Sinha, Regional Advisor (NCD and Tobacco Surveillance), WHO-SEARO and Dr. Lubna Bhatti, Epidemiologist, Prevention of Non-communicable Diseases (PND), World Health Organization, Geneva. Funding came from the National Health Mission, Punjab, India, JST. The funders had no role in study design, data collection and analysis, decision to publish, or preparation of the manuscript.

**US:** This work was supported in part by investigators working on the Supporting, Maintaining and Improving the Surveillance System for Chronic Kidney Disease in the U.S., Cooperative Agreement Number, U58 DP006254, funded by the Centers for Disease Control and Prevention. Its contents are solely the responsibility of the authors and do not necessarily represent the official position of the Centers for Disease Control and Prevention or the Department of Health and Human Services. The CDC CKD Surveillance System team is has been led jointly by



1  
2  
3 University of Michigan [Rajiv Saran (PI)]; University of California, San Francisco [Neil Powe  
4  
5 (PI)], since 2006 and funded and supported by Centers for Disease Control and Prevention  
6  
7 [Nilka Ríos Burrows (Technical Advisor)].  
8  
9  
10  
11  
12  
13  
14

## 15 **DATA SHARING STATEMENT**

16  
17  
18 All US data from the National Health and Nutrition Examination Survey (NHANES) is  
19  
20 publically available at <https://www.cdc.gov/nchs/nhanes/index.htm>. The Punjab data is available  
21  
22 by request and approval through collaborative agreements with the sponsors. Professor JS  
23  
24 Thakur is the Principal Investigator and can be contacted at [jsthakur64@gmail.com](mailto:jsthakur64@gmail.com).  
25  
26  
27  
28  
29  
30  
31  
32  
33  
34  
35  
36  
37  
38  
39  
40  
41  
42  
43  
44  
45  
46  
47  
48  
49  
50  
51  
52  
53  
54  
55  
56  
57  
58  
59  
60

## REFERENCES

1. Kundu MK, Hazra S, Pal D, Bhattacharya M. A review on Noncommunicable Diseases (NCDs) burden, its socio-economic impact and the strategies for prevention and control of NCDs in India. *Indian J Public Health*. 2018 Oct-Dec;62(4):302-304. doi: 10.4103/ijph.IJPH\_324\_16. PubMed PMID: 30539894.
2. India State-Level Disease Burden Initiative Collaborators. Nations within a nation: variations in epidemiological transition across the states of India, 1990-2016 in the Global Burden of Disease Study. *Lancet*. 2017 Dec 2;390(10111):2437-2460. doi: 10.1016/S0140-6736(17)32804-0. Epub 2017 Nov 14. Erratum in: *Lancet*. 2017 Dec 2;390(10111):e49. PubMed PMID: 29150201; PubMed Central PMCID: PMC5720596.
3. Thakur JS, Jeet G, Pal A, et al., Profile of Risk Factors for Non-Communicable Diseases in Punjab, Northern India: Results of a State-Wide STEPS Survey. *PLoS One*. 2016 Jul 7;11(7):e0157705. doi: 10.1371/journal.pone.0157705. eCollection 2016. PubMed PMID: 27389020; PubMed Central PMCID: PMC4936739.
4. Tripathy JP, Thakur JS, Jeet G, et al., Alarming high prevalence of hypertension and pre-hypertension in North India-results from a large cross-sectional STEPS survey. *PLoS One*. 2017 Dec 21;12(12):e0188619. doi: 10.1371/journal.pone.0188619. eCollection 2017. PubMed PMID: 29267338; PubMed Central PMCID: PMC5739392.
5. Tripathy JP, Thakur JS, Jeet G, et al., Prevalence and risk factors of diabetes in a large community-based study in North India: results from a STEPS survey in Punjab, India. *Diabetol Metab Syndr*. 2017 Jan 23;9:8. doi: 10.1186/s13098-017-0207-3. eCollection 2017. PubMed PMID:28127405; PubMed Central PMCID: PMC5259959.

- 1  
2  
3 6. Centers for Disease Control and Prevention (CDC). National Center for Health Statistics  
4 (NCHS). National Health and Nutrition Examination Survey Data. Hyattsville, MD: U.S.  
5 Department of Health and Human Services, Centers for Disease Control and Prevention,  
6 2013-2014.  
7  
8 <https://www.cdc.gov/nchs/nhanes/ContinuousNhanes/Default.aspx?BeginYear=2013>.  
9  
10
- 11  
12 7. Mulay AV, Gokhale SM. Comparison of serum creatinine-based estimating equations  
13 with gates protocol for predicting glomerular filtration rate in indian population. Indian J  
14 Nephrol. 2017 Mar-Apr;27(2):124-128. doi:10.4103/0971-4065.200515. PubMed PMID:  
15 28356664; PubMed Central PMCID: PMC5358152.  
16  
17
- 18 8. KDIGO: Kidney Disease: Improving Global Outcomes CKD Work Group. KDIGO 2012  
19 clinical practice guideline for the evaluation and management of chronic kidney disease.  
20 Kidney Int Suppl 2013;3(1):1–150.  
21  
22
- 23 9. Zou G. A modified Poisson regression approach to prospective studies with binary data.  
24 Am J Epidem 2004; 159(7):702-6.  
25  
26
- 27 10. Zou GY, Donner A. Extension of the modified Poisson regression model to prospective  
28 studies with correlated binary data. Statist Methods in Med Res 2013; 22(6):661-70.  
29  
30
- 31 11. Kaur G, Prinja S, Ramachandran R, Malhotra P, et al., Cost of hemodialysis in a public  
32 sector tertiary hospital of India. Clin Kidney J. 2018 Oct;11(5):726-733.  
33  
34
- 35 12. Kher V. End-stage renal disease in developing countries. Kidney Int. 2002 Jul;62(1):350-  
36 62. PubMed PMID: 12081600.  
37  
38
- 39 13. Balarajan Y, Selvaraj S, Subramanian SV. Health care and equity in India. Lancet. 2011  
40 Feb 5;377(9764):505-15. doi: 10.1016/S0140-6736(10)61894-6. Epub 2011 Jan 10.  
41  
42  
43  
44  
45  
46  
47  
48  
49  
50  
51  
52  
53  
54  
55  
56  
57  
58  
59  
60

- 1  
2  
3 14. Wang F, He K, Wang J, et al., Prevalence and Risk Factors for CKD: A Comparison  
4  
5 Between the Adult Populations in China and the United States. *Kidney Int Rep.* 2018 Jun  
6  
7 2;3(5):1135-1143. doi:  
8  
9 10.1016/j.ekir.2018.05.011. eCollection 2018 Sep. PubMed PMID: 30197980; PubMed  
10  
11 Central PMCID: PMC6127437.  
12  
13  
14  
15 15. Bragg-Gresham J, Morgenstern H, McClellan W, et al.; Centers for Disease Control and  
16  
17 Prevention CKD Surveillance System. County-level air quality and the prevalence of  
18  
19 diagnosed chronic kidney disease in the US Medicare population. *PLoS One.* 2018 Jul  
20  
21 31;13(7):e0200612. doi: 10.1371/journal.pone.0200612. eCollection 2018. PubMed  
22  
23 PMID: 30063741; PubMed Central PMCID: PMC6067706.  
24  
25  
26  
27 16. Bowe B, Xie Y, Li T, et al., Particulate Matter Air Pollution and the Risk of Incident  
28  
29 CKD and Progression to ESRD. *J Am Soc Nephrol.* 2018 Jan;29(1):218-230. doi:  
30  
31 10.1681/ASN.2017030253. Epub 2017 Sep 21. PubMed PMID: 28935655; PubMed  
32  
33 Central PMCID: PMC5748906.  
34  
35  
36 17. Lin SY, Hsu WH, Lin CL, et. al., Association of Exposure to Fine-Particulate Air  
37  
38 Pollution and Acidic Gases with Incidence of Nephrotic Syndrome. *Int J Environ Res*  
39  
40 *Public Health.* 2018 Dec 14;15(12). pii: E2860. doi: 10.3390/ijerph15122860. PubMed  
41  
42 PMID: 30558173.  
43  
44  
45 18. Chan TC, Zhang Z, Lin BC, et al., Long-Term Exposure to Ambient Fine Particulate  
46  
47 Matter and Chronic Kidney Disease: A Cohort Study. *Environ Health Perspect.* 2018  
48  
49 Oct;126(10):107002. doi: 10.1289/EHP3304. PubMed PMID: 30392394.  
50  
51  
52 19. Kim HJ, Min JY, Seo YS, et al., Association between exposure to ambient air pollution  
53  
54 and renal function in Korean adults. *Ann Occup Environ Med.* 2018 Feb 28;30:14. doi:  
55  
56  
57  
58  
59  
60

1  
2  
3 10.1186/s40557-018-0226-z. eCollection 2018. PubMed PMID: 29507730; PubMed  
4  
5 Central PMCID: PMC5831208.  
6

- 7  
8 20. Sharma AK, Baliyan P, Kumar P. Air pollution and public health: the challenges for  
9  
10 Delhi, India. *Rev Environ Health*. 2018 Mar 28;33(1):77-86. doi: 10.1515/reveh-2017-  
11  
12 0032. Review. PubMed PMID: 29267177.  
13  
14 21. Bulletin of the World Health Organization 2016;94:487-488. Doi:  
15  
16 <http://dx.doi.org/10.2471/BLT.16.020716>.  
17  
18 22. Correa-Rotter R, Wesseling C, Johnson RJ. CKD of unknown origin in Central America:  
19  
20 the case for a Mesoamerican nephropathy. *Am J Kidney Dis*. 2014 Mar;63(3):506-20.  
21  
22 doi: 10.1053/j.ajkd.2013.10.062. Epub 2014 Jan 10. Review. PubMed PMID: 24412050.  
23  
24 23. Huang MJ, Wei RB, Zhao J, et al., Albuminuria and Endothelial Dysfunction in Patients  
25  
26 with Non-Diabetic Chronic Kidney Disease. *Med Sci Monit*. 2017 Sep 15;23:4447-4453.  
27  
28 PubMed PMID: 28915230; PubMed Central PMCID: PMC5612264.  
29  
30 24. Schmieder RE, Schrader J, Zidek W, Tebbe U, et al., Low-grade albuminuria and  
31  
32 cardiovascular risk : what is the evidence? *Clin Res Cardiol*. 2007 May;96(5):247-57.  
33  
34 Epub 2007 Apr 26. Review. PubMed PMID: 17453140.  
35  
36 25. Seliger SL, Salimi S, Pierre V, et al., Microvascular endothelial dysfunction is associated  
37  
38 with albuminuria and CKD in older adults. *BMC Nephrol*. 2016 Jul 13;17(1):82. doi:  
39  
40 10.1186/s12882-016-0303-x. PubMed PMID: 27412615; PubMed Central PMCID:  
41  
42 PMC4944235.  
43  
44 26. Gomes M, Begum R, Sati P, et al., Nationwide Mortality Studies To Quantify Causes Of  
45  
46 Death: Relevant Lessons From India's Million Death Study. *Health Aff (Millwood)*. 2017  
47  
48 Nov;36(11):1887-1895. doi: 10.1377/hlthaff.2017.0635. PubMed PMID: 29137507.  
49  
50  
51  
52  
53  
54  
55  
56  
57  
58  
59  
60

1  
2  
3  
4  
5  
6  
7  
8  
9  
10  
11  
12  
13  
14  
15  
16  
17  
18  
19  
20  
21  
22  
23  
24  
25  
26  
27  
28  
29  
30  
31  
32  
33  
34  
35  
36  
37  
38  
39  
40  
41  
42  
43  
44  
45  
46  
47  
48  
49  
50  
51  
52  
53  
54  
55  
56  
57  
58  
59  
60

For peer review only

1  
2  
3  
4  
5  
6  
7  
8  
9  
10  
11  
12  
13  
14  
15  
16  
17  
18  
19  
20  
21  
22  
23  
24  
25  
26  
27  
28  
29  
30  
31  
32  
33  
34  
35  
36  
37  
38  
39  
40  
41  
42  
43  
44  
45  
46  
47  
48  
49  
50  
51  
52  
53  
54  
55  
56  
57  
58  
59  
60

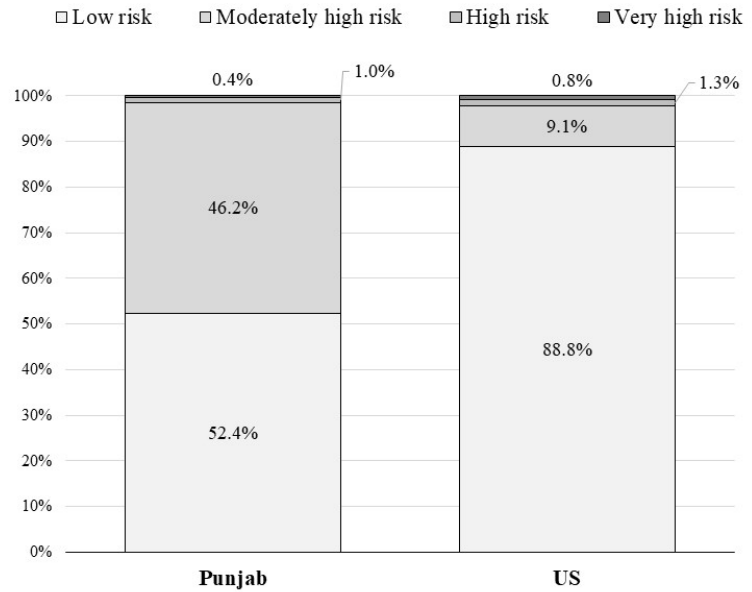

254x190mm (96 x 96 DPI)

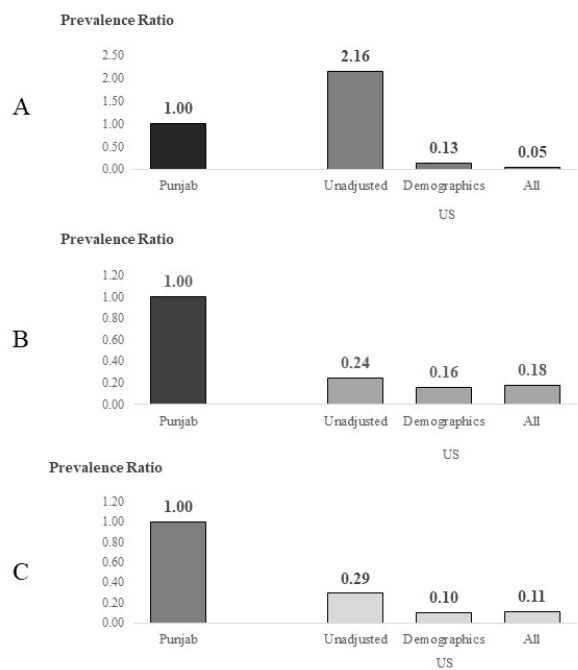

254x190mm (96 x 96 DPI)



STROBE Statement—Checklist of items that should be included in reports of *cross-sectional studies*

|                           | Item No | Recommendation                                                                                                                                                                                               | Page No |
|---------------------------|---------|--------------------------------------------------------------------------------------------------------------------------------------------------------------------------------------------------------------|---------|
| <b>Title and abstract</b> | 1       | (a) Indicate the study's design with a commonly used term in the title or the abstract                                                                                                                       | 2       |
|                           |         | (b) Provide in the abstract an informative and balanced summary of what was done and what was found                                                                                                          | 2       |
| <b>Introduction</b>       |         |                                                                                                                                                                                                              |         |
| Background/rationale      | 2       | Explain the scientific background and rationale for the investigation being reported                                                                                                                         | 4       |
| Objectives                | 3       | State specific objectives, including any prespecified hypotheses                                                                                                                                             | 4-5     |
| <b>Methods</b>            |         |                                                                                                                                                                                                              |         |
| Study design              | 4       | Present key elements of study design early in the paper                                                                                                                                                      | 5       |
| Setting                   | 5       | Describe the setting, locations, and relevant dates, including periods of recruitment, exposure, follow-up, and data collection                                                                              | 5       |
| Participants              | 6       | (a) Give the eligibility criteria, and the sources and methods of selection of participants                                                                                                                  | 5       |
| Variables                 | 7       | Clearly define all outcomes, exposures, predictors, potential confounders, and effect modifiers. Give diagnostic criteria, if applicable                                                                     | 7       |
| Data sources/measurement  | 8*      | For each variable of interest, give sources of data and details of methods of assessment (measurement). Describe comparability of assessment methods if there is more than one group                         | 7       |
| Bias                      | 9       | Describe any efforts to address potential sources of bias                                                                                                                                                    | 8       |
| Study size                | 10      | Explain how the study size was arrived at                                                                                                                                                                    | 5       |
| Quantitative variables    | 11      | Explain how quantitative variables were handled in the analyses. If applicable, describe which groupings were chosen and why                                                                                 | NA      |
| Statistical methods       | 12      | (a) Describe all statistical methods, including those used to control for confounding                                                                                                                        | 8       |
|                           |         | (b) Describe any methods used to examine subgroups and interactions                                                                                                                                          | NA      |
|                           |         | (c) Explain how missing data were addressed                                                                                                                                                                  | NA      |
|                           |         | (d) If applicable, describe analytical methods taking account of sampling strategy                                                                                                                           | 8       |
|                           |         | (e) Describe any sensitivity analyses                                                                                                                                                                        | NA      |
| <b>Results</b>            |         |                                                                                                                                                                                                              |         |
| Participants              | 13*     | (a) Report numbers of individuals at each stage of study—eg numbers potentially eligible, examined for eligibility, confirmed eligible, included in the study, completing follow-up, and analysed            | NA      |
|                           |         | (b) Give reasons for non-participation at each stage                                                                                                                                                         | NA      |
|                           |         | (c) Consider use of a flow diagram                                                                                                                                                                           | NA      |
| Descriptive data          | 14*     | (a) Give characteristics of study participants (eg demographic, clinical, social) and information on exposures and potential confounders                                                                     | 8-10    |
|                           |         | (b) Indicate number of participants with missing data for each variable of interest                                                                                                                          | NA      |
| Outcome data              | 15*     | Report numbers of outcome events or summary measures                                                                                                                                                         | 9       |
| Main results              | 16      | (a) Give unadjusted estimates and, if applicable, confounder-adjusted estimates and their precision (eg, 95% confidence interval). Make clear which confounders were adjusted for and why they were included | 12-15   |

|                          |    |                                                                                                                                                                            |       |
|--------------------------|----|----------------------------------------------------------------------------------------------------------------------------------------------------------------------------|-------|
|                          |    | (b) Report category boundaries when continuous variables were categorized                                                                                                  | NA    |
|                          |    | (c) If relevant, consider translating estimates of relative risk into absolute risk for a meaningful time period                                                           | NA    |
| Other analyses           | 17 | Report other analyses done—eg analyses of subgroups and interactions, and sensitivity analyses                                                                             | NA    |
| <b>Discussion</b>        |    |                                                                                                                                                                            |       |
| Key results              | 18 | Summarise key results with reference to study objectives                                                                                                                   | 16    |
| Limitations              | 19 | Discuss limitations of the study, taking into account sources of potential bias or imprecision. Discuss both direction and magnitude of any potential bias                 | 18    |
| Interpretation           | 20 | Give a cautious overall interpretation of results considering objectives, limitations, multiplicity of analyses, results from similar studies, and other relevant evidence | 19    |
| Generalisability         | 21 | Discuss the generalisability (external validity) of the study results                                                                                                      | 17    |
| <b>Other information</b> |    |                                                                                                                                                                            |       |
| Funding                  | 22 | Give the source of funding and the role of the funders for the present study and, if applicable, for the original study on which the present article is based              | 20-21 |

\*Give information separately for exposed and unexposed groups.

**Note:** An Explanation and Elaboration article discusses each checklist item and gives methodological background and published examples of transparent reporting. The STROBE checklist is best used in conjunction with this article (freely available on the Web sites of PLoS Medicine at <http://www.plosmedicine.org/>, Annals of Internal Medicine at <http://www.annals.org/>, and Epidemiology at <http://www.epidem.com/>). Information on the STROBE Initiative is available at [www.strobe-statement.org](http://www.strobe-statement.org).

# BMJ Open

## High Prevalence of Chronic Kidney Disease and its Risk Factors in the Punjab, Northern India: A Comparison with the United States

|                                 |                                                                                                                                                                                                                                                                                                                                                                                                                                                                                                                                                                                                                                                                                                                                                                                                                                                                                                     |
|---------------------------------|-----------------------------------------------------------------------------------------------------------------------------------------------------------------------------------------------------------------------------------------------------------------------------------------------------------------------------------------------------------------------------------------------------------------------------------------------------------------------------------------------------------------------------------------------------------------------------------------------------------------------------------------------------------------------------------------------------------------------------------------------------------------------------------------------------------------------------------------------------------------------------------------------------|
| Journal:                        | <i>BMJ Open</i>                                                                                                                                                                                                                                                                                                                                                                                                                                                                                                                                                                                                                                                                                                                                                                                                                                                                                     |
| Manuscript ID                   | bmjopen-2020-040444.R1                                                                                                                                                                                                                                                                                                                                                                                                                                                                                                                                                                                                                                                                                                                                                                                                                                                                              |
| Article Type:                   | Original research                                                                                                                                                                                                                                                                                                                                                                                                                                                                                                                                                                                                                                                                                                                                                                                                                                                                                   |
| Date Submitted by the Author:   | 03-Aug-2020                                                                                                                                                                                                                                                                                                                                                                                                                                                                                                                                                                                                                                                                                                                                                                                                                                                                                         |
| Complete List of Authors:       | Bragg-Gresham, Jennifer ; University of Michigan Medical School, Internal Medicine - Division of Nephrology<br>Thakur, JS; Post Graduate Institute of Medical Education and Research, School of Public Health<br>Jeet, Gursimer; Post Graduate Institute of Medical Education and Research, School of Public Health<br>Jain, Sanjay; Post Graduate Institute of Medical Education and Research, School of Public Health<br>Pal, Arnab; Post Graduate Institute of Medical Education and Research, School of Public Health<br>Prasad , Rajendra; Post Graduate Institute of Medical Education and Research, School of Public Health<br>Pennathur, Subramaniam; University of Michigan Medical School, Internal Medicine - Division of Nephrology<br>Saran, Rajiv; University of Michigan School of Public Health, Internal Medicine and Molecular and Integrative Physiology, Division of Nephrology |
| <b>Primary Subject Heading</b>: | Global health                                                                                                                                                                                                                                                                                                                                                                                                                                                                                                                                                                                                                                                                                                                                                                                                                                                                                       |
| Secondary Subject Heading:      | Epidemiology, Public health, Renal medicine                                                                                                                                                                                                                                                                                                                                                                                                                                                                                                                                                                                                                                                                                                                                                                                                                                                         |
| Keywords:                       | EPIDEMIOLOGY, NEPHROLOGY, Adult nephrology < NEPHROLOGY                                                                                                                                                                                                                                                                                                                                                                                                                                                                                                                                                                                                                                                                                                                                                                                                                                             |
|                                 |                                                                                                                                                                                                                                                                                                                                                                                                                                                                                                                                                                                                                                                                                                                                                                                                                                                                                                     |

SCHOLARONE™  
Manuscripts



I, the Submitting Author has the right to grant and does grant on behalf of all authors of the Work (as defined in the below author licence), an exclusive licence and/or a non-exclusive licence for contributions from authors who are: i) UK Crown employees; ii) where BMJ has agreed a CC-BY licence shall apply, and/or iii) in accordance with the terms applicable for US Federal Government officers or employees acting as part of their official duties; on a worldwide, perpetual, irrevocable, royalty-free basis to BMJ Publishing Group Ltd ("BMJ") its licensees and where the relevant Journal is co-owned by BMJ to the co-owners of the Journal, to publish the Work in this journal and any other BMJ products and to exploit all rights, as set out in our [licence](#).

The Submitting Author accepts and understands that any supply made under these terms is made by BMJ to the Submitting Author unless you are acting as an employee on behalf of your employer or a postgraduate student of an affiliated institution which is paying any applicable article publishing charge ("APC") for Open Access articles. Where the Submitting Author wishes to make the Work available on an Open Access basis (and intends to pay the relevant APC), the terms of reuse of such Open Access shall be governed by a Creative Commons licence – details of these licences and which [Creative Commons](#) licence will apply to this Work are set out in our licence referred to above.

Other than as permitted in any relevant BMJ Author's Self Archiving Policies, I confirm this Work has not been accepted for publication elsewhere, is not being considered for publication elsewhere and does not duplicate material already published. I confirm all authors consent to publication of this Work and authorise the granting of this licence.

1  
2  
3 **High Prevalence of Chronic Kidney Disease and its Risk Factors in the Punjab, Northern**  
4  
5 **India: A Comparison with the United States**  
6

7 Jennifer Bragg-Gresham, PhD<sup>1</sup>; JS Thakur, MD<sup>2</sup>; Gursimer Jeet, PhD<sup>2</sup>, Sanjay Jain, MD<sup>2</sup>; Arnab  
8 Pal, MD<sup>2</sup>; Rajendra Prasad, MD<sup>2</sup>; Subramaniam Pennathur, MD<sup>1</sup>; and Rajiv Saran<sup>1</sup>  
9

- 10  
11  
12  
13  
14  
15 1. Department of Internal Medicine, Division of Nephrology, University of Michigan, Ann  
16 Arbor, MI, USA  
17  
18  
19 2. School of Public Health, Post Graduate Institute of Medical Education and Research,  
20 Chandigarh-160012, India  
21  
22  
23  
24  
25

26 **Corresponding Author:**

27  
28 Rajiv Saran, MD, MBBS, MD, MRCP, MS

29  
30 1415 Washington Heights, 3645 SPH I

31  
32 Ann Arbor, MI 48109

33  
34 Email: rsaran@med.umich.edu

35  
36 Phone: (734) 764-6611 Fax: (734) 736-4004  
37  
38  
39  
40  
41  
42

43 **Word Count (excluding title page, abstract, references, figures and tables): 2,898**

44  
45 **Key Words:** Chronic Kidney Disease, Albuminuria, India, Risk Factors  
46

47 **Running Headline:** CKD Prevalence in Punjab, India  
48  
49  
50  
51  
52  
53  
54  
55  
56

## ABSTRACT

**Objectives:** India is witnessing a disturbing growth in non-communicable diseases (NCDs), including chronic kidney disease (CKD). Recently, a WHO STEPS survey was conducted in the state of Punjab, India to collect data from the adult population on NCD risk factors. We sought to compare the prevalence of CKD and its risk factors between this large state in northern India and the United States.

**Setting:** Samples were drawn from both locations, Punjab, India and the US, using multi-stage stratified sampling designs to collect data representative of the general population.

**Participants:** Data from 2,002 participants in the Punjab survey (2014-2015) and 5,057 in the US (National Health and Nutrition Examination Survey (NHANES; 2013-2014), between the ages of 18-69 years were examined.

**Primary and secondary outcome measures:** Modified Poisson regression was employed to compare prevalence rates between the two samples for markers of CKD and its risk factors. All analyses used sampling weights.

**Results:** The average age in the Punjab sample was significantly lower than the US (38.3 vs. 42.5 years,  $p < 0.0001$ ). While smoking and obesity were higher in the US, hypertension was much more common in Punjab (48.2% vs. 33.4%,  $p < 0.0001$ ). Significant differences were seen in the prevalence of CKD, with lower prevalence of  $eGFR < 60 \text{ ml/min/1.73m}^2$  (2.0% vs. 3.8%,  $p < 0.0001$ ), but markedly higher prevalence of albuminuria (46.7% vs. 8.9%,  $p < 0.0001$ ) in Punjab. These differences could not be explained by traditional risk factors such as diabetes and hypertension.

**Conclusions:** We report a strikingly high prevalence of albuminuria in Punjab, India, compared with the United States. This requires further study and may have enormous public

1  
2  
3 health implications for future burden of progressive CKD, end stage kidney disease, morbidity,  
4 mortality, and specifically for elevated risk or presence of cardiovascular disease in the northern  
5 state of Punjab, India.  
6  
7  
8  
9

10  
11  
12 Funding came from the National Health Mission, Punjab, India, JST and the Centers for Disease  
13 Control and Prevention, Atlanta, GA, USA.  
14  
15  
16  
17  
18

## 19 **STRENGTHS AND LIMITATIONS OF THIS STUDY**

### 23 **Strengths:**

- 24 • Representative Samples from both the State of Punjab, India and the United States
- 25 • Uniform laboratory testing for identification of kidney disease
- 26 • Comprehensive data collection on anthropomorphic measurements, laboratory  
27 measurements, comorbid conditions, and health behaviors

### 31 **Limitations:**

- 32 • Cross-sectional study design cannot establish causality
- 33 • Because the sample from India was only from one state, the Punjab, we cannot generalize  
34 our findings to all of India

## INTRODUCTION

The state of Punjab - indeed all of India, similar to other low and middle income countries (LMICs), is witnessing a disturbing growth in NCDs.[1] The country faces this epidemiologic transition while continuing to grapple with the problem of communicable diseases, which still remain a significant burden.[2] With this knowledge, the Department of Health and Family Welfare in Punjab, India, worked closely with the Post Graduate Institute of Medical Education and Research, Chandigarh, India, and medical colleges in the state to conduct the first representative survey of NCDs in the state of Punjab in 2014 and 2015.

The goal of this survey was to collect critical and up to date data on risk factors for NCDs in Punjab, with the hope of improving health planning and implementation of state initiatives, such as the National Program for Prevention and Control of Cancer, Diabetes, Cardiovascular disease and Stroke (NPCDCS).[3] This survey provides a wealth of data on both risk factors for kidney disease and kidney disease itself, comparable to data collected in the United States from the National Health and Nutrition Examination Survey (NHANES).

Previous work utilizing data from this source have shown an alarmingly high prevalence of hypertension (40.1%) and pre-hypertension (40.8%) in the region, with approximately 70% of these individuals being unaware of their condition.[4] Similarly, although less prevalent, diabetes was found in 8.3% (6.3% with pre-diabetes) participants, with only 18% of individuals being aware of their disease.[5] Since diabetes and hypertension are two of the key risk factors for kidney disease, we hypothesized that the state of Punjab may be experiencing or on the verge of experiencing a significant burden of kidney disease.

Therefore, in the current study we sought to examine the prevalence of CKD (using both low glomerular filtration rate and albuminuria criteria) and risk factors for CKD, comparing the



Punjab to a representative sample of individuals from the US National Health and Nutrition Examination Survey (NHANES). In addition, we also sought to compare the magnitude of the associations between risk factors and CKD in the two samples.

## MATERIALS AND METHODS

### Study Sample

The STEPS survey of non-communicable disease (NCD) risk factors was carried out from June 2014 to August 2015 in Punjab.[3] A multi-stage stratified sampling design was used to generate representative data for two age-groups (18-44, 45-69), sex, and area of residence in the state. A total of 5,127 adults, ages 18-69 years, participated in the survey. The overall response rate for STEP1/2 and STEP 3 was 95% and 93% respectively. Data were collected in three steps: Socio-demographic and behavioral information was collected in Step 1, physical measurements such as height, weight and blood pressure were done in Step 2, and biochemical measurements were undertaken to assess salt intake, blood glucose, triglycerides and cholesterol levels in Step 3. This analysis included individuals from STEP 3 of the survey, which was carried out in a subset of 2700 participants. The individuals used in STEP 3 were selected by taking a sub-sample of half of the study participants considering resource constraints. Every 2nd individual contacted for STEP 1 and 2 was subjected to STEP 3. A total of 2,002 individuals who had complete data on both albuminuria and serum creatinine were analyzed. Specific sample weights were available for the individuals included in STEP 3.

The US data for comparison were from the 2013-2014 National Health and Nutrition Examination Survey (NHANES), included 5,057 individuals. Multi-stage stratified sampling

1  
2  
3 design was used to collect data representative of the US general population. [6] The NHANES is  
4 supported by the National Center for Health Statistics and was designed to assess the health and  
5 nutritional status of adults and children in the United States. The study combines interviews,  
6 physical examinations, laboratory tests, and participant lifestyle surveys. Individuals between the  
7 ages of 18 and 69 years, with complete information on estimated glomerular filtration rate and  
8 albuminuria, were examined to match with the Punjab sample.  
9  
10  
11  
12  
13  
14  
15  
16  
17  
18  
19

## 20 **Patient and Public Involvement**

21  
22  
23 The research question was assessed using existing data taken from large, representative  
24 surveys, which contained more health questions and health measures than those presented in this  
25 work. The aim of the larger studies were to assess the overall health of each region, focused on  
26 diseases of global health impact, rather than individual patient priorities. The NHANES program  
27 began in the early 1960s, as a series of surveys focusing on different population groups or health  
28 topics over time. Participants were not involved in the design of the study, recruitment, or  
29 conduct of the study. NHANES participants receive their results from their examination as a  
30 preliminary report when leaving the exam center. A final report of findings is sent to each  
31 participant through the mail 12-16 weeks after their exam. Participants are free to discuss their  
32 results with their doctor and to keep for their own medical records.  
33  
34  
35  
36  
37  
38  
39  
40  
41  
42  
43  
44  
45

46 Similarly, the Punjab STEPS survey was a state-level public health effort undertaken to  
47 estimate the burden of many non-communicable diseases in that region. The government funded  
48 study, similar to NHANES did not enlist patient opinion during study design, but did have a plan  
49 to provide results to participants if abnormal and warranting medical follow-up.  
50  
51  
52  
53  
54  
55  
56  
57  
58  
59  
60

## Measures

In the Punjab, collection of blood and urine samples were done in the mornings, after participants had fasted overnight. Samples were centrifuged using a mini-centrifuge and separated serum was stored in ice boxes then transferred daily to a nearest public health institute with facility for  $-20^{\circ}\text{C}$  storage. Samples were transported to the central laboratory weekly. Collection of all the biochemical tests was at household level. Urine albumin-to-creatinine ratio was performed as a point-of-care field test using the URS 2AC strip that tests for 2 parameters microalbumin and creatinine (Biosense Technologies, Thane, Maharashtra, India). Calibration of the instruments and validation of field testing kits in a proportion of samples, was performed by the central biochemistry laboratory at PGIMER, Chandigarh per their standard protocol. Point-of-care field testing has been validated previously. [7,8] Laboratory measurements of serum creatinine (IDMS standardized assays) were made on Modular P 800 autoanalyzer (Roche Diagnostics, Germany) using commercially available kits (Roche Diagnostics, Germany). In the US NHANES sample, urine samples were processed, stored, and shipped to University of Minnesota, Minneapolis, MN for analysis. Detailed instructions on specimen collection and processing are discussed in the NHANES Laboratory Procedures Manual (LPM - [https://wwwn.cdc.gov/nchs/data/nhanes/2015-2016/manuals/2016\\_MEC\\_Laboratory\\_Procedures\\_Manual.pdf](https://wwwn.cdc.gov/nchs/data/nhanes/2015-2016/manuals/2016_MEC_Laboratory_Procedures_Manual.pdf)). Vials were stored under appropriate frozen ( $-30^{\circ}\text{C}$ ) conditions until they are shipped to University of Minnesota for testing. The NHANES quality assurance and quality control (QA/QC) protocols meet the 1988 Clinical Laboratory Improvement Act mandates. Detailed QA/QC instructions are discussed in the NHANES LPM. A solid-phase fluorescent immunoassay was employed for the measurement

1  
2  
3 of human urinary albumin is described by Chavers et al. [9] Contract laboratories randomly  
4 perform repeat testing on 2% of all specimens.  
5  
6

7         Kidney function was assessed by estimated glomerular filtration rate (eGFR), calculated  
8 with using the CKD-Epi formula in both samples, employing the coefficients for White race in  
9 India.[10] Albuminuria was defined as a urine albumin to creatinine ratio (ACR) > 30 mg/g.  
10  
11 Kidney disease was also assessed using the KDIGO risk categories, which places individuals into  
12 four risk groups for mortality based on their eGFR and ACR levels (low risk: eGFR > 60 and  
13 ACR < 30; moderately high risk: eGFR 45-59 with ACR < 30 or eGFR > 60 with ACR 30-300;  
14 high risk: eGFR 30-44 with ACR < 30, eGFR 45-59 with ACR 30-300, or eGFR > 60 with ACR  
15 > 300; or very high risk: eGFR < 30, eGFR 30-44 with ACR > 30, or eGFR 45-59 with ACR >  
16 300.[11]  
17  
18  
19  
20  
21  
22  
23  
24  
25  
26  
27

28         Risk factors for kidney disease were defined similarly between the two samples. Diabetes  
29 was defined by presence of any of the following: being told by a doctor they had diabetes, taking  
30 medication for diabetes (including medication from traditional healers in India), or fasting  
31 glucose > 126 mg/dl. Hypertension was defined as any of the following: being told by a doctor  
32 they had hypertension, taking medications for hypertension, or having systolic blood pressure  
33 (SBP) > 140mmHg or diastolic blood pressure (DBP) > 90mmHg.  
34  
35  
36  
37  
38  
39  
40  
41

42         Different cut-points for identifying obesity were used between samples to account for the  
43 differences in stature. In the US, the WHO definition was employed where underweight was  
44 defined as BMI < 18.5, normal weight as BMI 18.5 – 24.99, overweight as BMI 25 – 29.99, and  
45 obese as BMI ≥ 30 kg/m<sup>2</sup>. In Punjab obesity was defined using the same criteria as other  
46 published papers using this survey data with underweight being defined as BMI < 18.5, normal  
47 weight as BMI 18.5 – 22.99, overweight as BMI 23 – 26.99, and obese as BMI ≥ 27 kg/m<sup>2</sup>. [1-3]  
48  
49  
50  
51  
52  
53  
54  
55  
56  
57  
58  
59  
60

## Statistical Analysis

Demographic, socio-economic, anthropometric, health status, and markers of kidney disease were compared between counties using sample weighted t-tests for means or Chi-square tests for categorical variables. ACR was expressed as the median value due to its highly right-skewed nature. Associations between patient characteristics and risk factors for kidney disease with laboratory markers of kidney disease were modeled using modified Poisson regression with robust errors. This modeling approach was chosen, as opposed to logistic regression, because it yields estimates of prevalence ratios (PRs), rather than odds ratios.[12,13] PR estimates were determined for the kidney disease risk factors within each country in a single model using interactions between a country indicator variable and each measure. Age and sex were considered as demographic variables. A sensitivity analysis was performed, stratifying the models by sex.

Analysis of de-identified data received from the Punjab WHO Steps Survey for this study was deemed IRB exempt by the University of Michigan IRB. NHANES data is publically available for use by researchers and does not require an IRB approval.

## RESULTS

Many differences exist between individuals in Punjab and the US, as shown in Table 1. The mean age was approximately four years younger in Punjab ( $p<0.0001$ ), with a higher proportion of men (58.2% vs. 48.9%,  $p<0.0001$ ) compared with the US. The US had a much higher percentage of both high school or higher education and private health insurance coverage

1  
2  
3 (p<0.0001). Overall body size was very different, with Punjab residents being 6 cm shorter,  
4  
5 weighing 18 kilograms less, having 10 cm smaller waist circumference, and BMI lower by 4.6  
6  
7 kg/m<sup>2</sup> (all p<0.0001). Comparison of obesity by categories showed a higher percentage of  
8  
9 individuals in Punjab as underweight (11.3% vs. 1.5% in the US) and a higher proportion of  
10  
11 obese individuals in the US (37.9% vs. 28.9%, p<0.0001), while proportions of those in the  
12  
13 normal or overweight categories were very similar. While smoking was higher in the US,  
14  
15 hypertension was much more common in Punjab (48.2% vs. 33.4%, p<0.0001). No differences  
16  
17 were seen in the prevalence of diabetes, cardiovascular disease, or triglyceride levels, although  
18  
19 the US had higher total cholesterol levels (4.9 vs. 3.9 mmol/L [189 vs. 150 mg/dL] in Punjab,  
20  
21  
22  
23  
24 p<0.0001).  
25  
26  
27  
28  
29  
30  
31  
32  
33  
34  
35  
36  
37  
38  
39  
40  
41  
42  
43  
44  
45  
46  
47  
48  
49  
50  
51  
52  
53  
54  
55  
56  
57  
58  
59  
60

**Table 1: Comparison of Weighted Survey Sample Participant Characteristics between the Adult Populations in the State of Punjab, India and the United States**

| Measure                               | Punjab (2014-2015) |                | US (2013-2014) |                | P value |
|---------------------------------------|--------------------|----------------|----------------|----------------|---------|
|                                       | N                  | Mean (SE) or % | N              | Mean (SE) or % |         |
| Age (years)                           | 2,002              | 38.3 (0.60)    | 5,057          | 42.5 (0.38)    | <0.0001 |
| Male (%)                              | 2,002              | 58.2%          | 5,057          | 48.9%          | 0.0001  |
| Education to high school or above (%) | 2,002              | 43.4%          | 4,718          | 85.3%          | <0.0001 |
| Health Insurance (%)                  | 2,002              | 6.2%           | 5,052          | 79.8%          | <0.0001 |
| Height (cm)                           | 1,986              | 163.0 (0.37)   | 5,008          | 169.0 (0.31)   | <0.0001 |
| Weight (Kg)                           | 1,993              | 65.4 (0.6)     | 5,006          | 83.5 (0.54)    | <0.0001 |
| BMI (kg/m <sup>2</sup> ) *            | 1,982              | 24.6 (0.23)    | 5,000          | 29.2 (0.20)    | <0.0001 |
| Underweight                           | 1,982              | 11.3           | 5,000          | 1.5            | <0.0001 |
| Normal                                |                    | 29.5           |                | 29.1           |         |
| Overweight                            |                    | 30.3           |                | 31.5           |         |
| Obese                                 |                    | 28.9           |                | 37.9           |         |
| Waist (cm)                            | 1,995              | 89.0 (0.62)    | 4,836          | 98.8 (0.38)    | <0.0001 |
| Current smoker (%)                    | 2,002              | 7.5%           | 5,057          | 21.6%          | <0.0001 |
| Diabetes (%)                          | 1,043              | 7.7%           | 5,057          | 8.9%           | 0.42    |
| Hypertension (%)                      | 2,000              | 48.2%          | 5,057          | 33.4%          | <0.0001 |
| CVD (%)                               | 1,989              | 4.6%           | 5,057          | 3.4%           | 0.08    |
| Triglyceride (mmol/L)                 | 2,001              | 1.4 (0.04)     | 2,294          | 1.4 (0.04)     | 0.35    |
| Total cholesterol (mmol/L)            | 2,002              | 3.9 (0.06)     | 4,812          | 4.9 (0.02)     | <0.0001 |
| Serum Creatinine (µmol/L)             | 2,002              | 61.9 (0.9)     | 4,798          | 77.8 (0.9)     | <0.0001 |
| eGFR (mL/min/1.73m <sup>2</sup> )     | 2,002              | 114.8 (1.1)    | 4,798          | 97.8 (0.6)     | <0.0001 |
| eGFR < 60 ml/min/1.73m <sup>2</sup>   | 2,002              | 2.0%           | 4,798          | 3.8%           | <0.0001 |
| Urine Albumin (g/L; median)           | 1,928              | 0.2 (0.03)     | 4,971          | 0.07 (0.002)   | <0.0001 |
| Urine Creatinine (µmol/L; median)     | 1,928              | 7,242 (265)    | 4,971          | 9,275 (292)    | <0.0001 |
| ACR (mg/mmol; median) <sup>±</sup>    | 1,928              | 2.5 (0.25)     | 4,971          | 0.66 (0.007)   | <0.0001 |
| ACR > 3 mg/mmol                       | 1,928              | 46.7%          | 4,971          | 8.9%           | <0.0001 |

CVD: cardiovascular disease.

eGFR: estimated glomerular filtration rate.

ACR: urine albumin: creatinine ratio.

\* Different BMI cut-points used for obesity:

US: Underweight < 18.5, normal = 18.5 - 24.9, overweight = 25 - 29.9, obese 30+

India: Underweight < 18, normal = 18 - 22.9, overweight = 23 - 24.9, obese 25+

<sup>±</sup> Median employed to examine differences in urine measurements due to high degree of risk-skew.

Although Punjab had a lower prevalence of eGFR < 60 ml/min/1.73m<sup>2</sup> (2.0% vs. 3.8%, p<0.0001), the prevalence of albuminuria was five times higher (46.7% vs. 8.9%, p<0.0001).

1  
2  
3 When assessing kidney function using the KDIGO risk categories (Table 2), the high prevalence  
4 of high UACR lead to 46.2% of participants in Punjab being classified as “moderately high risk”,  
5 compared to only 9.1% in the US. In contrast, Punjab had only 1.4% in the “high risk” or  
6 “extremely high risk” groups compared to 2.1% in the US (Figure 1).  
7  
8  
9  
10  
11  
12  
13  
14  
15  
16  
17  
18  
19  
20  
21  
22  
23  
24  
25  
26  
27  
28  
29  
30  
31  
32  
33  
34  
35  
36  
37  
38  
39  
40  
41  
42  
43  
44  
45  
46  
47  
48  
49  
50  
51  
52  
53  
54  
55  
56  
57  
58  
59  
60

For peer review only



Table 2: Prevalence of Albuminuria and eGFR KDIGO Risk Categories among Adults in Punjab and United States

| Punjab, India                                                |     |                         |       | Albuminuria categories     |                             |                          | Total            |
|--------------------------------------------------------------|-----|-------------------------|-------|----------------------------|-----------------------------|--------------------------|------------------|
|                                                              |     |                         |       | A1                         | A2                          | A3                       |                  |
|                                                              |     |                         |       | Normal to mildly increased | Moderately increased        | Severely increased       |                  |
|                                                              |     |                         |       | <30 mg/g<br><3 mg/mmol     | 30-300 mg/g<br>3-30 mg/mmol | >300 mg/g<br>>30 mg/mmol |                  |
| GFR categories <sup>2</sup><br>(ml/min/1.73 m <sup>2</sup> ) | G1  | Normal to high          | ≥90   | 46.7 (40.7-52.6)           | 42.0 (35.3-48.7)            | 0.2 (0-0.7)              | 88.9 (86.0-91.8) |
|                                                              | G2  | Mildly decreased        | 60-89 | 5.7 (3.6-7.6)              | 3.5 (2.4-4.7)               | 0                        | 9.2 (6.8-11.5)   |
|                                                              | G3a | Mildly to mod decreased | 45-59 | 0.7 (0.1-1.3)              | 0.5 (0-1.0)                 | 0                        | 1.2 (0.3-2.1)    |
|                                                              | G3b | Mod to severe decreased | 30-44 | 0.3 (0-0.7)                | 0.5 (0-1.1)                 | 0                        | 0.8 (0.1-1.5)    |
|                                                              | G4  | Severely decreased      | 15-29 | 0.03 (0-0.08)              | 0.01 (0-0.02)               | 0                        | 0.04 (0-0.09)    |
|                                                              | G5  | Kidney failure          | <15   | 0                          | 0                           | 0                        | 0                |
| <b>Total</b>                                                 |     |                         |       | 53.4 (46.3-60.2)           | 46.5 (39.5-53.5)            | 0.2 (0-0.7)              | 100              |
| United States                                                |     |                         |       | Albuminuria categories     |                             |                          | Total            |
|                                                              |     |                         |       | A1                         | A2                          | A3                       |                  |
|                                                              |     |                         |       | Normal to mildly increased | Moderately increased        | Severely increased       |                  |
|                                                              |     |                         |       | <30 mg/g<br><3 mg/mmol     | 30-300 mg/g<br>3-30 mg/mmol | >300 mg/g<br>>30 mg/mmol |                  |
| GFR categories <sup>2</sup><br>(ml/min/1.73 m <sup>2</sup> ) | G1  | Normal to high          | ≥90   | 60.7 (58.1-63.1)           | 4.8 (4.0-5.6)               | 0.5 (0.3-0.7)            | 66.0 (63.1-68.9) |
|                                                              | G2  | Mildly decreased        | 60-89 | 28.1 (25.6-30.7)           | 2.2 (1.5-2.7)               | 0.1 (0.05-0.2)           | 30.4 (27.7-33.1) |
|                                                              | G3a | Mildly to mod decreased | 45-59 | 2.1 (1.4-2.7)              | 0.4 (0.2-0.7)               | 0.2 (0-0.3)              | 2.7 (1.9-3.5)    |
|                                                              | G3b | Mod to severe decreased | 30-44 | 0.3 (0.1-0.4)              | 0.2 (0.03-0.4)              | 0.1 (0.02-0.2)           | 0.6 (0.4-0.8)    |
|                                                              | G4  | Severely decreased      | 15-29 | 0.05 (0.0-0.1)             | 0.05 (0.01-1.0)             | 0.09 (0-0.2)             | 0.2 (0.05-0.3)   |
|                                                              | G5  | Kidney failure          | <15   | 0                          | 0.06 (0-0.2)                | 0.07 (0.01-0.1)          | 0.1 (0.01-0.3)   |
| <b>Total</b>                                                 |     |                         |       | 91.2 (90.0-92.5)           | 7.7 (6.6-8.8)               | 1.1 (0.8-1.3)            | 100              |

Lightest gray = Low Risk

Light gray = Moderately High Risk

13

Medium gray = High Risk

Dark gray = Very High Risk

1  
2  
3 To compare the magnitude of association between traditional risk factors for CKD  
4  
5 between the two samples, we modeled prevalence ratios in each country within one model to  
6  
7 allow for the associations to be compared statistically (Table 3). When examining low eGFR (<  
8  
9 60 ml/min/1.73m<sup>2</sup>) as the outcome, male participants in Punjab showed a much lower prevalence  
10  
11 compared with females (prevalence ratio: PR=0.22, p=0.007); while no association was seen in  
12  
13 the US between sex and low eGFR (PR=1.09, p=0.56). These associations were significantly  
14  
15 different from each other with p=0.006. Another difference between the associations and  
16  
17 outcome was seen for hypertension (p=0.008), where a non-significant lower prevalence ratio  
18  
19 was observed in Punjab (PR=0.75, p=0.43) and a strong positive association was seen in the US  
20  
21 (PR=2.24, p<0.0001). Similar positive associations were seen in both samples for older age,  
22  
23 higher education level, CVD, and DM on the prevalence of low eGFR.  
24  
25  
26  
27

28 Table 3b displays the associations between patient factors and the prevalence of  
29  
30 albuminuria. Significant differences between the samples was again seen with sex and the  
31  
32 outcome (p=0.02). No association between sex and albuminuria was seen in Punjab, where in the  
33  
34 US males had a lower prevalence of albuminuria (PR=0.77, p=0.004). While in both samples  
35  
36 hypertension and DM were associated with a higher prevalence of albuminuria, the magnitude of  
37  
38 association was much stronger in the US (PR=1.19 in Punjab vs. PR=1.93 in the US for  
39  
40 hypertension and PR=1.32 in Punjab vs. PR=2.54 in the US for DM). Current smoking was  
41  
42 associated with albuminuria only in the US (PR=1.34, p=0.002), while higher total cholesterol  
43  
44 was associated with albuminuria in the Punjab (PR=1.11 per 0.5 mmol/L higher total  
45  
46 cholesterol).  
47  
48  
49  
50  
51  
52  
53  
54  
55  
56  
57  
58  
59  
60

When combining low eGFR and albuminuria into a composite (CKD) outcome (Table 3c) more differences were found between the samples in certain associations. Significantly larger associations were found in the US for the relationship between older age, hypertension, DM, and BMI; while a larger association was seen between total cholesterol and the composite CKD measure in the Punjab.

**Table 3: Prevalence Ratios for Markers of CKD by Risk Factors**

A. Low eGFR (eGFR < 60 ml/min/1.73m<sup>2</sup>)

| Measure                                          | Punjab |             |        | US   |             |         | P-value for interaction |
|--------------------------------------------------|--------|-------------|--------|------|-------------|---------|-------------------------|
|                                                  | PR     | 95% CI      | P      | PR   | 95% CI      | P       |                         |
| Age (per 10 years)                               | 1.73   | 1.29 – 2.31 | 0.0002 | 2.14 | 1.82 – 2.52 | <0.0001 | 0.20                    |
| Male (vs. Female)                                | 0.22   | 0.07 – 0.66 | 0.007  | 1.09 | 0.81 – 1.47 | 0.56    | <b>0.006</b>            |
| Education high school + (vs. no)                 | 1.86   | 0.84 – 4.10 | 0.13   | 1.53 | 1.06 – 2.20 | 0.02    | 0.66                    |
| Current smoker (vs. no)                          | 2.32   | 0.31 – 1.74 | 0.41   | 0.92 | 0.63 – 1.34 | 0.66    | 0.38                    |
| Hypertension (vs. no)                            | 0.75   | 0.37 – 1.52 | 0.43   | 2.24 | 1.51 – 3.33 | <0.0001 | <b>0.008</b>            |
| DM (vs. no)                                      | 2.75   | 1.17 – 6.48 | 0.02   | 1.76 | 1.27 – 2.44 | 0.0007  | 0.34                    |
| CVD (vs. no)                                     | 1.11   | 0.34 – 3.60 | 0.87   | 1.98 | 1.20 – 1.38 | 0.0002  | 0.35                    |
| Total Cholesterol (per 20 mg/dl, per 0.5 mmol/L) | 1.09   | 0.73 – 1.64 | 0.67   | 0.92 | 0.76 – 1.11 | 0.36    | 0.44                    |
| BMI (per 5 Kg/m <sup>2</sup> )                   | 0.82   | 0.59 – 1.15 | 0.25   | 1.13 | 1.04 – 1.23 | 0.006   | 0.07                    |
| Obesity:                                         |        |             |        |      |             |         |                         |
| Underweight                                      | 1.24   | 0.26 – 5.95 | 0.79   | 1.45 | 0.36 – 5.89 | 0.60    | 0.88                    |
| Healthy weight                                   | 1.00   | -           | ref    | 1.00 | -           | ref     |                         |
| Overweight                                       | 2.63   | 1.09 – 6.34 | 0.03   | 1.31 | 0.83 – 2.07 | 0.25    | 0.17                    |
| Obese                                            | 0.73   | 0.27 – 1.95 | 0.53   | 1.40 | 0.91 – 2.14 | 0.13    | 0.23                    |

## B. Albuminuria (ACR &gt; 30 mg/g, 3 mg/mmol)

| Measure                                          | Punjab |             |        | US   |             |         | P-value for interaction |
|--------------------------------------------------|--------|-------------|--------|------|-------------|---------|-------------------------|
|                                                  | PR     | 95% CI      | P      | PR   | 95% CI      | P       |                         |
| Age (per 10 years)                               | 1.03   | 0.99 – 1.08 | 0.16   | 1.06 | 0.98 – 1.14 | 0.15    | 0.60                    |
| Male (vs. Female)                                | 0.99   | 0.88 – 1.12 | 0.93   | 0.77 | 0.65 – 0.92 | 0.004   | <b>0.02</b>             |
| Education high school + (vs. no)                 | 0.99   | 0.88 – 1.11 | 0.80   | 0.81 | 0.67 – 0.98 | 0.03    | 0.09                    |
| Current smoker (vs. no)                          | 1.09   | 0.85 – 1.40 | 0.48   | 1.35 | 1.11 – 1.63 | 0.002   | 0.20                    |
| Hypertension (vs. no)                            | 1.19   | 1.06 – 1.34 | 0.005  | 1.93 | 1.59 – 2.36 | <0.0001 | <b>&lt;0.0001</b>       |
| DM (vs. no)                                      | 1.32   | 1.12 – 1.56 | 0.0008 | 2.54 | 2.07 – 3.13 | <0.0001 | <b>&lt;0.0001</b>       |
| CVD (vs. no)                                     | 1.14   | 0.92 – 1.37 | 0.24   | 1.32 | 1.16 – 0.99 | 0.06    | 0.37                    |
| Total Cholesterol (per 20 mg/dl, per 0.5 mmol/L) | 1.11   | 1.04 – 1.17 | 0.001  | 0.99 | 0.90 – 1.09 | 0.81    | <b>0.05</b>             |
| BMI (per 5 Kg/m <sup>2</sup> )                   | 0.99   | 0.94 – 1.03 | 0.54   | 1.04 | 0.98 – 1.10 | 0.19    | 0.16                    |
| Obesity:                                         |        |             |        |      |             |         |                         |
| Underweight                                      | 0.90   | 0.72 – 1.11 | 0.32   | 1.20 | 0.56 – 2.56 | 0.64    | 0.47                    |
| Healthy weight                                   | 1.00   | -           | ref    | 1.00 | -           | ref     | -                       |
| Overweight                                       | 0.95   | 0.82 – 1.10 | 0.48   | 0.93 | 0.72 – 1.18 | 0.53    | 0.85                    |
| Obese                                            | 0.95   | 0.83 – 1.09 | 0.48   | 1.01 | 0.80 – 1.27 | 0.96    | 0.68                    |

## C. CKD (low eGFR or Albuminuria)

| Measure                                          | Punjab |             |        | US   |             |         | P-value for interaction |
|--------------------------------------------------|--------|-------------|--------|------|-------------|---------|-------------------------|
|                                                  | PR     | 95% CI      | P      | PR   | 95% CI      | P       |                         |
| Age (per 10 years)                               | 1.04   | 1.00 – 1.09 | 0.06   | 1.20 | 1.12 – 1.29 | <0.0001 | <b>0.0007</b>           |
| Male (vs. Female)                                | 0.97   | 0.86 – 1.09 | 0.58   | 0.81 | 0.70 – 0.94 | 0.007   | 0.0686                  |
| Education high school + (vs. no)                 | 1.00   | 0.90 – 1.12 | 0.96   | 0.91 | 0.77 – 1.09 | 0.31    | 0.379                   |
| Current smoker (vs. no)                          | 1.09   | 0.85 – 1.40 | 0.49   | 1.26 | 1.06 – 1.49 | 0.008   | 0.3526                  |
| Hypertension (vs. no)                            | 1.18   | 1.05 – 1.33 | 0.006  | 1.87 | 1.57 – 2.23 | <0.0001 | <b>&lt;0.0001</b>       |
| DM (vs. no)                                      | 1.35   | 1.16 – 1.58 | 0.0002 | 2.11 | 1.77 – 2.53 | <0.0001 | <b>0.0002</b>           |
| CVD (vs. no)                                     | 1.13   | 0.94 – 1.37 | 0.19   | 1.49 | 1.12 – 1.18 | 0.0006  | 0.072                   |
| Total Cholesterol (per 20 mg/dl, per 0.5 mmol/L) | 1.09   | 1.04 – 1.16 | 0.002  | 0.97 | 0.88 – 1.05 | 0.41    | <b>0.02</b>             |
| BMI (per 5 Kg/m <sup>2</sup> )                   | 0.98   | 0.94 – 1.03 | 0.48   | 1.06 | 1.01 – 1.12 | 0.017   | <b>0.025</b>            |
| Obesity:                                         |        |             |        |      |             |         |                         |
| Underweight                                      | 0.89   | 0.72 – 1.10 | 0.28   | 1.31 | 0.67 – 2.54 | 0.43    | 0.28                    |
| Healthy weight                                   | 1.00   | -           | ref    | 1.00 | -           | ref     | -                       |
| Overweight                                       | 0.98   | 0.86 – 1.13 | 0.81   | 0.98 | 0.79 – 1.22 | 0.84    | 0.97                    |
| Obese                                            | 0.95   | 0.83 – 1.09 | 0.48   | 1.06 | 0.86 – 1.29 | 0.60    | 0.41                    |

Figure 2 displays the changes in prevalence ratios comparing US to Punjab for each marker of CKD with different levels of adjustment for traditional risk factors examined in Table 3. Before accounting for any differences in participants in the two studies, the prevalence of low eGFR was much higher in the US (PR=2.16), but after accounting for demographics (age and sex) and other health measures (remaining covariates), the US has a much lower prevalence of low eGFR compared to Punjab (PR=0.13 and 0.05,

1  
2  
3 respectively), suggesting that if the US had the same patient make up as Punjab, the prevalence  
4 of low eGFR would be much lower. The findings for albuminuria and any CKD were very  
5 similar in showing that before adjustment the prevalence of either marker was much lower in the  
6 US (PR=0.24 and 0.29, respectively) and accounting for difference in demographics and health  
7 measures between the samples changed these estimates very little. These results suggest that  
8 traditional risk factors do not entirely explain the difference in prevalence seen among markers  
9 of kidney disease between the US and Punjab.  
10  
11  
12  
13  
14  
15  
16  
17  
18  
19  
20  
21

## 22 **DISCUSSION**

23  
24  
25 In comparing two representative samples of participants from the adult population of  
26 Punjab, India and the United States, we found a very high prevalence of albuminuria in the  
27 Punjab, with almost half of the residents with urine ACR > 3 mg/mmol (30 mg/g). This is in  
28 contrast to the prevalence of albuminuria in the US of approximately 9%. When examining  
29 glomerular filtration rate, the Punjab had much higher average eGFR and a lower prevalence of  
30 eGFR < 60 ml/min/1.73m<sup>2</sup> (2.0% vs. 3.8%). Because of the high prevalence of albuminuria in  
31 the Punjab, almost half the population falls into the “moderately high risk” CKD risk category  
32 per KDIGO risk stratification criteria. Even more striking is the fact that the between country  
33 differences in the prevalence estimates of albuminuria could not be explained by traditional risk  
34 factors for CKD, such as age, hypertension, and diabetes.  
35  
36  
37  
38  
39  
40  
41  
42  
43  
44  
45  
46  
47

48 If true, these findings have enormous public health and resource implications for a low-  
49 middle income country such as India, specifically in the realm of CKD, cardiovascular disease  
50 and other NCDs. Currently there are no definitive estimates of prevalence of chronic kidney  
51 disease in India, as there is no ongoing national kidney registry/surveillance system. Recent  
52  
53  
54  
55  
56  
57  
58  
59  
60

1  
2  
3 publications have suggested that 220,000 patients are diagnosed with ESRD every year.[14] It is  
4  
5 estimated that this will result in demand for an additional 34 million dialysis sessions in India  
6  
7 each year. Besides the growing population of patients with kidneys disease, the country is faced  
8  
9 with a shortage of nephrologists, late referral of patients, inadequate health awareness about  
10  
11 preventive measures, and a lack of more cost-effective alternatives like renal transplantation or  
12  
13 peritoneal dialysis (PD).[14] It has been estimated that 70% of those who start dialysis in India  
14  
15 eventually give up dialysis due to financial constraints or death.[15] The health care system, with  
16  
17 most out-of-pocket expenditures borne by the households pose significant barriers to accessing  
18  
19 health services with approximately 60 million households pushed below the poverty line in India  
20  
21 as a result each year.[16]  
22  
23  
24  
25

26 We believe that our finding of the discordance observed in the prevalence of albuminuria  
27  
28 versus lower eGFR between India and the US could be in part due to the epidemiologic transition  
29  
30 that is occurring in countries such as India, where early evidence of kidney damage but lower  
31  
32 prevalence of low eGFR defined kidney disease or end stage kidney disease, may be the result of  
33  
34 higher death rates among the younger population from premature cardiovascular disease, so  
35  
36 while early kidney disease evidenced by albuminuria is more common, prevalence of later stages  
37  
38 of kidney disease is lower (but potentially rising). Although not to the same degree, we reported  
39  
40 similar findings in a recent study comparing CKD between China and the US.[17] China, another  
41  
42 country which has gone through great economic and population growth in recent years, displayed  
43  
44 a low prevalence of advanced kidney disease (eGFR < 60 ml/min/1.73m<sup>2</sup>), but a higher  
45  
46 prevalence of albuminuria than the US. The strength of association between traditional risk  
47  
48 factors, such as hypertension and diabetes, were also weaker among the Chinese sample,  
49  
50 although the association between age and CKD prevalence was much stronger.  
51  
52  
53  
54  
55  
56  
57  
58  
59  
60

1  
2  
3 Supportive evidence for a high rate of albuminuria in India have been reported from the  
4 western state of Gujarat. [18] This study represents a voluntary sample of participants who were  
5 screened during a World Kidney Day Screening Camp. Even though the investigators excluded  
6 individuals at risk of albuminuria (participants with known diabetes, stone diseases,  
7 hypertension, kidney/liver/cardiac disease, hepatitis, HIV, transplant recipients, pregnant women  
8 and those < 18 years of age), they estimated a 13.8% prevalence of albuminuria in their study.  
9  
10 This is higher than in the US general population random sample in NHANES, which includes the  
11 individuals most likely to have albuminuria.  
12  
13  
14  
15  
16  
17  
18  
19  
20

21 The high prevalence of albuminuria in Punjab could be related to the metabolic syndrome  
22 known to be associated with albuminuria. [19] In this context, insulin resistance and visceral  
23 adiposity are common in developing nations and mechanistically linked with the metabolic  
24 syndrome through adipocytokines and inflammation. [20] The high prevalence of premature  
25 cardiovascular disease and hypertension can be accompanied by albuminuria from vascular  
26 dysfunction or damage, leading to disruption of the glomerular filtration barrier. Furthermore,  
27 the evidence linking kidney disease to environmental factors continues to grow. [21] Air  
28 pollution (highly prevalent in that part of the world), is associated with both endothelial  
29 dysfunction and low grade inflammation with resultant albuminuria. In the US, PM2.5 levels  
30 have been linked to the prevalence of CKD, risk of incident CKD, and its progression.[22,23]  
31  
32 This association is also being explored outside the US with findings published from Taiwan and  
33 Korea showing similar results.[24-26] India currently has some of the highest levels of air  
34 pollution in the world. It is estimated that 1.5 million people died from the effects of air pollution  
35 in 2012. [27,28] While less studied, it is also plausible that kidney disease may be influenced by  
36 pollutants in both the water and soil as well, similar to the factors potentially underlying the  
37  
38  
39  
40  
41  
42  
43  
44  
45  
46  
47  
48  
49  
50  
51  
52  
53  
54  
55  
56  
57  
58  
59  
60



1  
2  
3 epidemic of CKD of unknown etiology, although this has not been reported from northern India,  
4  
5 and albuminuria is not the hallmark of this latter condition. [29]  
6  
7

8 Unless actions are undertaken now to further investigate and reduce the high rate of  
9  
10 albuminuria (albeit based on single cross-sectional estimates) reported in this study, the  
11  
12 infrastructure and economy in India will likely not be able to optimally care for an increasing  
13  
14 burden of those who may progress to ESRD in the not too distant future. Further, since  
15  
16 albuminuria is also a marker of endothelial dysfunction and has been linked to cardiovascular  
17  
18 outcomes, even at low levels, the higher risk of premature cardiovascular disease needs to be  
19  
20 kept in mind in relation to albuminuria. [30-32]  
21  
22  
23

24 To the best of our knowledge, this is the first study to estimate kidney disease prevalence  
25  
26 at state level in India based on a random sample of the adult population living in a large,  
27  
28 populous, northern Indian state. Further, it is also the first to compare prevalence of CKD  
29  
30 between India and the US (after adjusting for patient characteristics around the same time period  
31  
32 in the two nations). However, it is not without limitations. Because the sample from India was  
33  
34 only from one state, the Punjab, we cannot generalize our findings to all of India. Although this  
35  
36 is a large state, the risk factor distribution and prevalence could be different in other areas of the  
37  
38 country.[33] In addition, the people, land and environment in India are diverse and of a highly  
39  
40 variegated nature with significant urban-rural differences. It should also be acknowledged that  
41  
42 the Punjab STEPS survey is cross-sectional in design and while appropriately sampled to be  
43  
44 representative of the state, may be limited by its sample size. Lastly, both NHANES and the  
45  
46 Punjab STEPS survey checked albuminuria and serum creatinine at a single point in time,  
47  
48 whereas the KDIGO definition of CKD requires demonstration of persistence of these  
49  
50  
51  
52  
53  
54  
55  
56  
57  
58  
59  
60

1  
2  
3 abnormalities. We believe however, that repeat sampling of blood and urine in public health  
4 surveys, while highly desirable, is often difficult to achieve in the real world.  
5  
6

7  
8 Future research to confirm our findings using repeat sampling and similar studies in other  
9 states, and further examination of the association between environmental factors and kidney  
10 disease in India is urgently warranted. Such studies would benefit from having population  
11 samples from multiple states, preferably be longitudinal in nature, and have the potential to  
12 examine multiple environmental factors, while accounting for the traditional risk factors for  
13 kidney disease.  
14  
15  
16  
17  
18  
19  
20

21 In summary, we report very high prevalence of albuminuria in a large state (the Punjab)  
22 in northern India. Albuminuria is considered an early sign of kidney damage as well as may  
23 reflect endothelial dysfunction, a harbinger of atherosclerosis-related cardiovascular disease.  
24 Progression of this early stage kidney and cardiovascular disease elevates the potential for an  
25 epidemic of ESRD and higher rates of cardiovascular disease in a country undergoing rapid  
26 epidemiologic and economic transition. Urgent action and further research is needed to  
27 determine the underlying cause(s) of these findings, in the hopes of stemming the tide of rising  
28 rates of kidney failure and cardiovascular disease. India must clearly prepare for an inevitable  
29 increase in the need for renal replacement therapy in the coming years.  
30  
31  
32  
33  
34  
35  
36  
37  
38  
39  
40  
41  
42  
43  
44  
45  
46  
47  
48  
49  
50  
51  
52  
53  
54  
55  
56  
57  
58  
59  
60

## COMPETING INTERESTS:

**Jennifer L. Bragg-Gresham:** None

**JS Thakur:** None

**Gursimer Jeet:** None

**Sanjay Jain:** None

**Arnab Pal:** None

**Rajendra Prasad:** None

**Subramaniam Pennathur:** None

**Rajiv Saran:** None

## CONTRIBUTION STATEMENT:

**Jennifer L. Bragg-Gresham:** Data analysis and interpretation, manuscript writing, tables/figures creation

**JS Thakur:** Study design (India), data collection, manuscript planning, manuscript review and editing

**Gursimer Jeet:** Study design, data collection and programming, manuscript review and editing

**Sanjay Jain:** Study design, manuscript review and editing

**Arnab Pal:** Study design, manuscript review and editing

**Rajendra Prasad:** Study design, manuscript review and editing

**Subramaniam Pennathur:** Manuscript review and editing

**Rajiv Saran:** Study concept, data interpretation, manuscript writing, manuscript review and editing

## FUNDING SOURCES AND ACKNOWLEDGEMENTS

**Punjab:** We appreciate the support from Department of Health and Family welfare, Punjab especially Professor. KK Talwar, Advisor (Health), Government of Punjab, Ms. Vini Mahajan, IAS, Principal Secretary, Department of Health and Family Welfare and Mr. Hussan Lal, IAS, Secretary, Medical Education and Mission Director, National Health Mission, Punjab for their guidance and support for the project in conducting the study. Contributions by Biosense Pvt. Limited are acknowledged. We would like to thanks the members of Technical Advisory Committee and chairperson Prof. SK Jindal who provided technical oversight for the designing and implementation of survey. In addition inputs from advisors from University of Michigan were valuable. We sincerely acknowledge the financial support by National Health Mission (Punjab), Ministry of Health and Family Welfare, Government of India and technical support of WHO with special thanks to Dr. Dharendra N Sinha, Regional Advisor (NCD and Tobacco Surveillance), WHO-SEARO and Dr. Lubna Bhatti, Epidemiologist, Prevention of Non-communicable Diseases (PND), World Health Organization, Geneva. Funding came from the National Health Mission, Punjab, India, JST. The funders had no role in study design, data collection and analysis, decision to publish, or preparation of the manuscript.

**US:** This work was supported in part by investigators working on the Supporting, Maintaining and Improving the Surveillance System for Chronic Kidney Disease in the U.S., Cooperative Agreement Number, U58 DP006254, funded by the Centers for Disease Control and Prevention. Its contents are solely the responsibility of the authors and do not necessarily represent the

1  
2  
3 official position of the Centers for Disease Control and Prevention or the Department of Health  
4 and Human Services. The CDC CKD Surveillance System team is has been led jointly by  
5  
6 University of Michigan [Rajiv Saran (PI)]; University of California, San Francisco [Neil Powe  
7  
8 (PI)], since 2006 and funded and supported by Centers for Disease Control and Prevention  
9  
10 [Nilka Ríos Burrows (Technical Advisor)].  
11  
12  
13  
14  
15  
16  
17  
18

## 19 **DATA SHARING STATEMENT**

20  
21  
22 All US data from the National Health and Nutrition Examination Survey (NHANES) is  
23  
24 publically available at <https://www.cdc.gov/nchs/nhanes/index.htm>. The Punjab data is available  
25  
26 by request and approval through collaborative agreements with the sponsors. Professor JS  
27  
28 Thakur is the Principal Investigator and can be contacted at [jsthakur64@gmail.com](mailto:jsthakur64@gmail.com).  
29  
30  
31  
32  
33  
34  
35  
36  
37  
38  
39  
40  
41  
42  
43  
44  
45  
46  
47  
48  
49  
50  
51  
52  
53  
54  
55  
56  
57  
58  
59  
60

## FIGURE TITLES AND LEGENDS

**Figure 1: Distribution of KDIGO Risk Categories among Adults in Punjab, India and the United States**

**Figure 2: Changes in Prevalence Ratios between Punjab and the US for Markers of CKD with Different Levels of Adjustment for Risk Factors**

**A. Low eGFR**

**B. Albuminuria**

**C. Any CKD**

**Footnote:** Demographics = age, sex, and education & All = Demographics plus measures in Table 3

## REFERENCES

1. Kundu MK, Hazra S, Pal D, Bhattacharya M. A review on Noncommunicable Diseases (NCDs) burden, its socio-economic impact and the strategies for prevention and control of NCDs in India. *Indian J Public Health*. 2018 Oct-Dec;62(4):302-304. doi: 10.4103/ijph.IJPH\_324\_16. PubMed PMID: 30539894.
2. India State-Level Disease Burden Initiative Collaborators. Nations within a nation: variations in epidemiological transition across the states of India, 1990-2016 in the Global Burden of Disease Study. *Lancet*. 2017 Dec 2;390(10111):2437-2460. doi: 10.1016/S0140-6736(17)32804-0. Epub 2017 Nov 14. Erratum in: *Lancet*. 2017 Dec 2;390(10111):e49. PubMed PMID: 29150201; PubMed Central PMCID: PMC5720596.
3. Thakur JS, Jeet G, Pal A, et al., Profile of Risk Factors for Non-Communicable Diseases in Punjab, Northern India: Results of a State-Wide STEPS Survey. *PLoS One*. 2016 Jul 7;11(7):e0157705. doi: 10.1371/journal.pone.0157705. eCollection 2016. PubMed PMID: 27389020; PubMed Central PMCID: PMC4936739.
4. Tripathy JP, Thakur JS, Jeet G, et al., Alarmingly high prevalence of hypertension and pre-hypertension in North India-results from a large cross-sectional STEPS survey. *PLoS One*. 2017 Dec 21;12(12):e0188619. doi: 10.1371/journal.pone.0188619. eCollection 2017. PubMed PMID: 29267338; PubMed Central PMCID: PMC5739392.
5. Tripathy JP, Thakur JS, Jeet G, et al., Prevalence and risk factors of diabetes in a large community-based study in North India: results from a STEPS survey in Punjab, India. *Diabetol Metab Syndr*. 2017 Jan 23;9:8. doi: 10.1186/s13098-017-0207-3. eCollection 2017. PubMed PMID:28127405; PubMed Central PMCID: PMC5259959.

- 1  
2  
3 6. Centers for Disease Control and Prevention (CDC). National Center for Health Statistics  
4 (NCHS). National Health and Nutrition Examination Survey Data. Hyattsville, MD: U.S.  
5 Department of Health and Human Services, Centers for Disease Control and Prevention,  
6 2013-2014.  
7  
8 <https://www.cdc.gov/nchs/nhanes/ContinuousNhanes/Default.aspx?BeginYear=2013>.  
9  
10  
11
- 12  
13  
14 7. St John A, Tirimacco R, Badrick T, et al. Internet support for point-of-care testing in  
15 primary care. *Aust Fam Physician*. 2015;44(1-2):10-11,  
16  
17
- 18  
19 8. Lim S, Yu HJ, Lee S, Park H, Kwon MJ, Woo HY. Evaluation of the URiSCAN 2 ACR  
20 Strip to estimate the urine albumin/creatinine ratios. *J Clin Lab Anal*. 2018;32(3):e22289.  
21  
22 doi:10.1002/jcla.22289.  
23  
24
- 25  
26 9. Chavers BM, Simonson J, Michael AF. A solid phase fluorescent immunoassay for the  
27 measurement of human urinary albumin. *Kidney Int*. 1984;25(3):576-578.  
28  
29 doi:10.1038/ki.1984.57.  
30  
31
- 32  
33 10. Mulay AV, Gokhale SM. Comparison of serum creatinine-based estimating equations  
34 with gates protocol for predicting glomerular filtration rate in indian population. *Indian J*  
35  
36  
37  
38  
39  
40  
41  
42  
43  
44  
45  
46  
47  
48  
49  
50  
51  
52  
53  
54  
55  
56  
57  
58  
59  
60  
Nephrol. 2017 Mar-Apr;27(2):124-128. doi:10.4103/0971-4065.200515. PubMed PMID:  
28356664; PubMed Central PMCID: PMC5358152.
11. KDIGO: Kidney Disease: Improving Global Outcomes CKD Work Group. KDIGO 2012  
clinical practice guideline for the evaluation and management of chronic kidney disease.  
*Kidney Int Suppl* 2013;3(1):1–150.
12. Zou G. A modified Poisson regression approach to prospective studies with binary data.  
*Am J Epidemiol* 2004; 159(7):702-6.



- 1  
2  
3 13. Zou GY, Donner A. Extension of the modified Poisson regression model to prospective  
4 studies with correlated binary data. *Statist Methods in Med Res* 2013; 22(6):661-70.  
5  
6  
7  
8 14. Kaur G, Prinja S, Ramachandran R, Malhotra P, et al., Cost of hemodialysis in a public  
9 sector tertiary hospital of India. *Clin Kidney J.* 2018 Oct;11(5):726-733.  
10  
11  
12 15. Kher V. End-stage renal disease in developing countries. *Kidney Int.* 2002 Jul;62(1):350-  
13 62. PubMed PMID: 12081600.  
14  
15  
16 16. Balarajan Y, Selvaraj S, Subramanian SV. Health care and equity in India. *Lancet.* 2011  
17 Feb 5;377(9764):505-15. doi: 10.1016/S0140-6736(10)61894-6. Epub 2011 Jan 10.  
18 PubMed PMID: 21227492; PubMed Central PMCID: PMC3093249.  
19  
20  
21 17. Wang F, He K, Wang J, et al., Prevalence and Risk Factors for CKD: A Comparison  
22 Between the Adult Populations in China and the United States. *Kidney Int Rep.* 2018 Jun  
23 2;3(5):1135-1143. doi:  
24 10.1016/j.ekir.2018.05.011. eCollection 2018 Sep. PubMed PMID: 30197980; PubMed  
25 Central PMCID: PMC6127437.  
26  
27  
28 18. Trivedi H, Vanikar A, Patel H, et al. High prevalence of chronic kidney disease in a semi-  
29 urban population of Western India. *Clin Kidney J.* 2016;9(3):438-443.  
30 doi:10.1093/ckj/sfw009  
31  
32  
33 19. Rashidbeygi E, Safabakhsh M, Delshad Aghdam S, Mohammed SH, Alizadeh S.  
34 Metabolic syndrome and its components are related to a higher risk for albuminuria and  
35 proteinuria: Evidence from a meta-analysis on 10,603,067 subjects from 57 studies.  
36 *Diabetes Metab Syndr.* 2019;13(1):830-843. doi:10.1016/j.dsx.2018.12.006.  
37  
38  
39  
40  
41  
42  
43  
44  
45  
46  
47  
48  
49  
50  
51  
52  
53  
54  
55  
56  
57  
58  
59  
60

- 1  
2  
3 20. Kumari R, Kumar S, Kant R. An update on metabolic syndrome: Metabolic risk markers  
4 and adipokines in the development of metabolic syndrome. *Diabetes Metab Syndr*.  
5  
6 2019;13(4):2409-2417. doi:10.1016/j.dsx.2019.06.005.  
7  
8  
9  
10 21. Xu, X., Nie, S., Ding, H. et al. Environmental pollution and kidney diseases. *Nat Rev*  
11  
12 *Nephrol* 14, 313–324 (2018). <https://doi.org/10.1038/nrneph.2018.11>.  
13  
14 22. Bragg-Gresham J, Morgenstern H, McClellan W, et al.; Centers for Disease Control and  
15  
16 Prevention CKD Surveillance System. County-level air quality and the prevalence of  
17  
18 diagnosed chronic kidney disease in the US Medicare population. *PLoS One*. 2018 Jul  
19  
20 31;13(7):e0200612. doi: 10.1371/journal.pone.0200612. eCollection 2018. PubMed  
21  
22 PMID: 30063741; PubMed Central PMCID: PMC6067706.  
23  
24  
25 23. Bowe B, Xie Y, Li T, et al., Particulate Matter Air Pollution and the Risk of Incident  
26  
27 CKD and Progression to ESRD. *J Am Soc Nephrol*. 2018 Jan;29(1):218-230. doi:  
28  
29 10.1681/ASN.2017030253. Epub 2017 Sep 21. PubMed PMID: 28935655; PubMed  
30  
31 Central PMCID: PMC5748906.  
32  
33  
34 24. Lin SY, Hsu WH, Lin CL, et. al., Association of Exposure to Fine-Particulate Air  
35  
36 Pollution and Acidic Gases with Incidence of Nephrotic Syndrome. *Int J Environ Res*  
37  
38 *Public Health*. 2018 Dec 14;15(12). pii: E2860. doi: 10.3390/ijerph15122860. PubMed  
39  
40 PMID: 30558173.  
41  
42  
43 25. Chan TC, Zhang Z, Lin BC, et al., Long-Term Exposure to Ambient Fine Particulate  
44  
45 Matter and Chronic Kidney Disease: A Cohort Study. *Environ Health Perspect*. 2018  
46  
47 Oct;126(10):107002. doi: 10.1289/EHP3304. PubMed PMID: 30392394.  
48  
49  
50 26. Kim HJ, Min JY, Seo YS, et al., Association between exposure to ambient air pollution  
51  
52 and renal function in Korean adults. *Ann Occup Environ Med*. 2018 Feb 28;30:14. doi:  
53  
54  
55  
56  
57  
58  
59  
60

1  
2  
3 10.1186/s40557-018-0226-z. eCollection 2018. PubMed PMID: 29507730; PubMed  
4  
5 Central PMCID: PMC5831208.  
6

- 7  
8 27. Sharma AK, Baliyan P, Kumar P. Air pollution and public health: the challenges for  
9  
10 Delhi, India. *Rev Environ Health*. 2018 Mar 28;33(1):77-86. doi: 10.1515/reveh-2017-  
11  
12 0032. Review. PubMed PMID: 29267177.  
13  
14 28. Bulletin of the World Health Organization 2016;94:487-488. Doi:  
15  
16 <http://dx.doi.org/10.2471/BLT.16.020716>.  
17  
18 29. Correa-Rotter R, Wesseling C, Johnson RJ. CKD of unknown origin in Central America:  
19  
20 the case for a Mesoamerican nephropathy. *Am J Kidney Dis*. 2014 Mar;63(3):506-20.  
21  
22 doi: 10.1053/j.ajkd.2013.10.062. Epub 2014 Jan 10. Review. PubMed PMID: 24412050.  
23  
24 30. Huang MJ, Wei RB, Zhao J, et al., Albuminuria and Endothelial Dysfunction in Patients  
25  
26 with Non-Diabetic Chronic Kidney Disease. *Med Sci Monit*. 2017 Sep 15;23:4447-4453.  
27  
28 PubMed PMID: 28915230; PubMed Central PMCID: PMC5612264.  
29  
30 31. Schmieder RE, Schrader J, Zidek W, Tebbe U, et al., Low-grade albuminuria and  
31  
32 cardiovascular risk : what is the evidence? *Clin Res Cardiol*. 2007 May;96(5):247-57.  
33  
34 Epub 2007 Apr 26. Review. PubMed PMID: 17453140.  
35  
36 32. Seliger SL, Salimi S, Pierre V, et al., Microvascular endothelial dysfunction is associated  
37  
38 with albuminuria and CKD in older adults. *BMC Nephrol*. 2016 Jul 13;17(1):82. doi:  
39  
40 10.1186/s12882-016-0303-x. PubMed PMID: 27412615; PubMed Central PMCID:  
41  
42 PMC4944235.  
43  
44 33. Gomes M, Begum R, Sati P, et al., Nationwide Mortality Studies To Quantify Causes Of  
45  
46 Death: Relevant Lessons From India's Million Death Study. *Health Aff (Millwood)*. 2017  
47  
48 Nov;36(11):1887-1895. doi: 10.1377/hlthaff.2017.0635. PubMed PMID: 29137507.  
49  
50  
51  
52  
53  
54  
55  
56  
57  
58  
59  
60

1  
2  
3  
4  
5  
6  
7  
8  
9  
10  
11  
12  
13  
14  
15  
16  
17  
18  
19  
20  
21  
22  
23  
24  
25  
26  
27  
28  
29  
30  
31  
32  
33  
34  
35  
36  
37  
38  
39  
40  
41  
42  
43  
44  
45  
46  
47  
48  
49  
50  
51  
52  
53  
54  
55  
56  
57  
58  
59  
60



254x190mm (96 x 96 DPI)

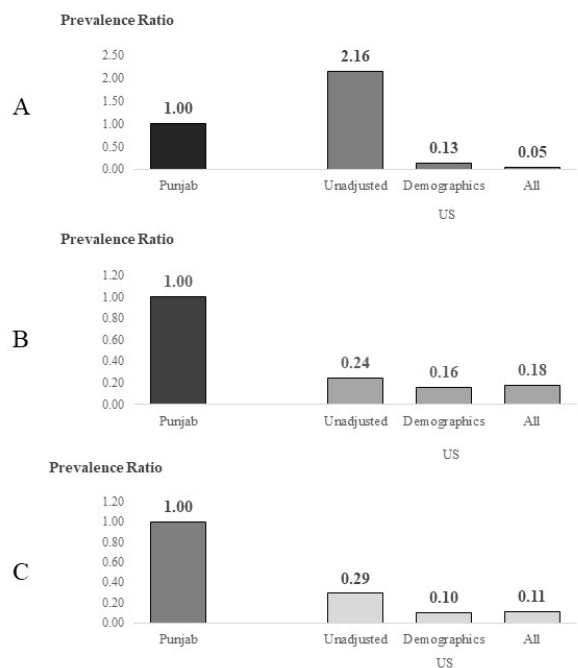

254x190mm (96 x 96 DPI)

STROBE Statement—Checklist of items that should be included in reports of *cross-sectional studies*

|                           | Item No | Recommendation                                                                                                                                                                                               | Page No |
|---------------------------|---------|--------------------------------------------------------------------------------------------------------------------------------------------------------------------------------------------------------------|---------|
| <b>Title and abstract</b> | 1       | (a) Indicate the study's design with a commonly used term in the title or the abstract                                                                                                                       | 2       |
|                           |         | (b) Provide in the abstract an informative and balanced summary of what was done and what was found                                                                                                          | 2       |
| <b>Introduction</b>       |         |                                                                                                                                                                                                              |         |
| Background/rationale      | 2       | Explain the scientific background and rationale for the investigation being reported                                                                                                                         | 4       |
| Objectives                | 3       | State specific objectives, including any prespecified hypotheses                                                                                                                                             | 4-5     |
| <b>Methods</b>            |         |                                                                                                                                                                                                              |         |
| Study design              | 4       | Present key elements of study design early in the paper                                                                                                                                                      | 5       |
| Setting                   | 5       | Describe the setting, locations, and relevant dates, including periods of recruitment, exposure, follow-up, and data collection                                                                              | 5       |
| Participants              | 6       | (a) Give the eligibility criteria, and the sources and methods of selection of participants                                                                                                                  | 5       |
| Variables                 | 7       | Clearly define all outcomes, exposures, predictors, potential confounders, and effect modifiers. Give diagnostic criteria, if applicable                                                                     | 7       |
| Data sources/measurement  | 8*      | For each variable of interest, give sources of data and details of methods of assessment (measurement). Describe comparability of assessment methods if there is more than one group                         | 7       |
| Bias                      | 9       | Describe any efforts to address potential sources of bias                                                                                                                                                    | 8       |
| Study size                | 10      | Explain how the study size was arrived at                                                                                                                                                                    | 5       |
| Quantitative variables    | 11      | Explain how quantitative variables were handled in the analyses. If applicable, describe which groupings were chosen and why                                                                                 | NA      |
| Statistical methods       | 12      | (a) Describe all statistical methods, including those used to control for confounding                                                                                                                        | 8       |
|                           |         | (b) Describe any methods used to examine subgroups and interactions                                                                                                                                          | NA      |
|                           |         | (c) Explain how missing data were addressed                                                                                                                                                                  | NA      |
|                           |         | (d) If applicable, describe analytical methods taking account of sampling strategy                                                                                                                           | 8       |
|                           |         | (e) Describe any sensitivity analyses                                                                                                                                                                        | NA      |
| <b>Results</b>            |         |                                                                                                                                                                                                              |         |
| Participants              | 13*     | (a) Report numbers of individuals at each stage of study—eg numbers potentially eligible, examined for eligibility, confirmed eligible, included in the study, completing follow-up, and analysed            | NA      |
|                           |         | (b) Give reasons for non-participation at each stage                                                                                                                                                         | NA      |
|                           |         | (c) Consider use of a flow diagram                                                                                                                                                                           | NA      |
| Descriptive data          | 14*     | (a) Give characteristics of study participants (eg demographic, clinical, social) and information on exposures and potential confounders                                                                     | 8-10    |
|                           |         | (b) Indicate number of participants with missing data for each variable of interest                                                                                                                          | NA      |
| Outcome data              | 15*     | Report numbers of outcome events or summary measures                                                                                                                                                         | 9       |
| Main results              | 16      | (a) Give unadjusted estimates and, if applicable, confounder-adjusted estimates and their precision (eg, 95% confidence interval). Make clear which confounders were adjusted for and why they were included | 12-15   |

|                          |    |                                                                                                                                                                            |       |
|--------------------------|----|----------------------------------------------------------------------------------------------------------------------------------------------------------------------------|-------|
|                          |    | (b) Report category boundaries when continuous variables were categorized                                                                                                  | NA    |
|                          |    | (c) If relevant, consider translating estimates of relative risk into absolute risk for a meaningful time period                                                           | NA    |
| Other analyses           | 17 | Report other analyses done—eg analyses of subgroups and interactions, and sensitivity analyses                                                                             | NA    |
| <b>Discussion</b>        |    |                                                                                                                                                                            |       |
| Key results              | 18 | Summarise key results with reference to study objectives                                                                                                                   | 16    |
| Limitations              | 19 | Discuss limitations of the study, taking into account sources of potential bias or imprecision. Discuss both direction and magnitude of any potential bias                 | 18    |
| Interpretation           | 20 | Give a cautious overall interpretation of results considering objectives, limitations, multiplicity of analyses, results from similar studies, and other relevant evidence | 19    |
| Generalisability         | 21 | Discuss the generalisability (external validity) of the study results                                                                                                      | 17    |
| <b>Other information</b> |    |                                                                                                                                                                            |       |
| Funding                  | 22 | Give the source of funding and the role of the funders for the present study and, if applicable, for the original study on which the present article is based              | 20-21 |

\*Give information separately for exposed and unexposed groups.

**Note:** An Explanation and Elaboration article discusses each checklist item and gives methodological background and published examples of transparent reporting. The STROBE checklist is best used in conjunction with this article (freely available on the Web sites of PLoS Medicine at <http://www.plosmedicine.org/>, Annals of Internal Medicine at <http://www.annals.org/>, and Epidemiology at <http://www.epidem.com/>). Information on the STROBE Initiative is available at [www.strobe-statement.org](http://www.strobe-statement.org).

# BMJ Open

## A Population-based Comparison of Chronic Kidney Disease Prevalence and Risk Factors among Adults living in the Punjab, Northern India and the United States (2013-2015)

|                                 |                                                                                                                                                                                                                                                                                                                                                                                                                                                                                                                                                                                                                                                                                                                                                                                                                                                                                                     |
|---------------------------------|-----------------------------------------------------------------------------------------------------------------------------------------------------------------------------------------------------------------------------------------------------------------------------------------------------------------------------------------------------------------------------------------------------------------------------------------------------------------------------------------------------------------------------------------------------------------------------------------------------------------------------------------------------------------------------------------------------------------------------------------------------------------------------------------------------------------------------------------------------------------------------------------------------|
| Journal:                        | <i>BMJ Open</i>                                                                                                                                                                                                                                                                                                                                                                                                                                                                                                                                                                                                                                                                                                                                                                                                                                                                                     |
| Manuscript ID                   | bmjopen-2020-040444.R2                                                                                                                                                                                                                                                                                                                                                                                                                                                                                                                                                                                                                                                                                                                                                                                                                                                                              |
| Article Type:                   | Original research                                                                                                                                                                                                                                                                                                                                                                                                                                                                                                                                                                                                                                                                                                                                                                                                                                                                                   |
| Date Submitted by the Author:   | 26-Aug-2020                                                                                                                                                                                                                                                                                                                                                                                                                                                                                                                                                                                                                                                                                                                                                                                                                                                                                         |
| Complete List of Authors:       | Bragg-Gresham, Jennifer ; University of Michigan Medical School, Internal Medicine - Division of Nephrology<br>Thakur, JS; Post Graduate Institute of Medical Education and Research, School of Public Health<br>Jeet, Gursimer; Post Graduate Institute of Medical Education and Research, School of Public Health<br>Jain, Sanjay; Post Graduate Institute of Medical Education and Research, School of Public Health<br>Pal, Arnab; Post Graduate Institute of Medical Education and Research, School of Public Health<br>Prasad , Rajendra; Post Graduate Institute of Medical Education and Research, School of Public Health<br>Pennathur, Subramaniam; University of Michigan Medical School, Internal Medicine - Division of Nephrology<br>Saran, Rajiv; University of Michigan School of Public Health, Internal Medicine and Molecular and Integrative Physiology, Division of Nephrology |
| <b>Primary Subject Heading</b>: | Global health                                                                                                                                                                                                                                                                                                                                                                                                                                                                                                                                                                                                                                                                                                                                                                                                                                                                                       |
| Secondary Subject Heading:      | Epidemiology, Public health, Renal medicine                                                                                                                                                                                                                                                                                                                                                                                                                                                                                                                                                                                                                                                                                                                                                                                                                                                         |
| Keywords:                       | EPIDEMIOLOGY, NEPHROLOGY, Adult nephrology < NEPHROLOGY                                                                                                                                                                                                                                                                                                                                                                                                                                                                                                                                                                                                                                                                                                                                                                                                                                             |
|                                 |                                                                                                                                                                                                                                                                                                                                                                                                                                                                                                                                                                                                                                                                                                                                                                                                                                                                                                     |

SCHOLARONE™  
Manuscripts





I, the Submitting Author has the right to grant and does grant on behalf of all authors of the Work (as defined in the below author licence), an exclusive licence and/or a non-exclusive licence for contributions from authors who are: i) UK Crown employees; ii) where BMJ has agreed a CC-BY licence shall apply, and/or iii) in accordance with the terms applicable for US Federal Government officers or employees acting as part of their official duties; on a worldwide, perpetual, irrevocable, royalty-free basis to BMJ Publishing Group Ltd ("BMJ") its licensees and where the relevant Journal is co-owned by BMJ to the co-owners of the Journal, to publish the Work in this journal and any other BMJ products and to exploit all rights, as set out in our [licence](#).

The Submitting Author accepts and understands that any supply made under these terms is made by BMJ to the Submitting Author unless you are acting as an employee on behalf of your employer or a postgraduate student of an affiliated institution which is paying any applicable article publishing charge ("APC") for Open Access articles. Where the Submitting Author wishes to make the Work available on an Open Access basis (and intends to pay the relevant APC), the terms of reuse of such Open Access shall be governed by a Creative Commons licence – details of these licences and which [Creative Commons](#) licence will apply to this Work are set out in our licence referred to above.

Other than as permitted in any relevant BMJ Author's Self Archiving Policies, I confirm this Work has not been accepted for publication elsewhere, is not being considered for publication elsewhere and does not duplicate material already published. I confirm all authors consent to publication of this Work and authorise the granting of this licence.

1  
2  
3 **A Population-based Comparison of Chronic Kidney Disease Prevalence and Risk Factors**  
4  
5 **among Adults living in the Punjab, Northern India and the United States (2013-2015)**  
6  
7  
8  
9

10 Jennifer Bragg-Gresham, PhD<sup>1</sup>; JS Thakur, MD<sup>2</sup>; Gursimer Jeet, PhD<sup>2</sup>, Sanjay Jain, MD<sup>2</sup>; Arnab  
11  
12 Pal, MD<sup>2</sup>; Rajendra Prasad, MD<sup>2</sup>; Subramaniam Pennathur, MD<sup>1</sup>; and Rajiv Saran<sup>1</sup>  
13  
14

- 15  
16  
17 1. Department of Internal Medicine, Division of Nephrology, University of Michigan, Ann  
18  
19 Arbor, MI, USA  
20  
21 2. School of Public Health, Post Graduate Institute of Medical Education and Research,  
22  
23 Chandigarh-160012, India  
24  
25  
26  
27

28 **Corresponding Author:**  
29

30 Rajiv Saran, MD, MBBS, MD, MRCP, MS  
31

32 1415 Washington Heights, 3645 SPH I  
33

34 Ann Arbor, MI 48109  
35

36 Email: rsaran@med.umich.edu  
37

38 Phone: (734) 764-6611 Fax: (734) 736-4004  
39  
40  
41  
42  
43  
44

45 **Word Count (excluding title page, abstract, references, figures and tables): 2,898**  
46

47 **Key Words:** Chronic Kidney Disease, Albuminuria, India, Risk Factors  
48

49 **Running Headline:** CKD Prevalence in Punjab, India  
50  
51  
52  
53  
54  
55  
56  
57  
58  
59  
60

## ABSTRACT

**Objectives:** India is witnessing a disturbing growth in non-communicable diseases (NCDs), including chronic kidney disease (CKD). Recently, a WHO STEPS survey was conducted in the state of Punjab, India to collect data from the adult population on NCD risk factors. We sought to compare the prevalence of CKD and its risk factors between this large state in northern India and the United States.

**Setting:** Samples were drawn from both locations, Punjab, India and the US, using multi-stage stratified sampling designs to collect data representative of the general population.

**Participants:** Data from 2,002 participants in the Punjab survey (2014-2015) and 5,057 in the US (National Health and Nutrition Examination Survey (NHANES; 2013-2014), between the ages of 18-69 years were examined.

**Primary and secondary outcome measures:** Modified Poisson regression was employed to compare prevalence rates between the two samples for markers of CKD and its risk factors. All analyses used sampling weights.

**Results:** The average age in the Punjab sample was significantly lower than the US (38.3 vs. 42.5 years,  $p < 0.0001$ ). While smoking and obesity were higher in the US, hypertension was much more common in Punjab (48.2% vs. 33.4%,  $p < 0.0001$ ). Significant differences were seen in the prevalence of CKD, with lower prevalence of  $eGFR < 60 \text{ ml/min/1.73m}^2$  (2.0% vs. 3.8%,  $p < 0.0001$ ), but markedly higher prevalence of albuminuria (46.7% vs. 8.9%,  $p < 0.0001$ ) in Punjab. These differences could not be explained by traditional risk factors such as diabetes and hypertension.

**Conclusions:** We report a strikingly high prevalence of albuminuria in Punjab, India, compared with the United States. This requires further study and may have enormous public

1  
2  
3 health implications for future burden of progressive CKD, end stage kidney disease, morbidity,  
4 mortality, and specifically for elevated risk or presence of cardiovascular disease in the northern  
5 state of Punjab, India.  
6  
7  
8  
9

10  
11  
12 Funding came from the National Health Mission, Punjab, India, JST and the Centers for Disease  
13 Control and Prevention, Atlanta, GA, USA.  
14  
15  
16  
17  
18

## 19 **STRENGTHS AND LIMITATIONS OF THIS STUDY**

### 23 **Strengths:**

- 24 • Representative Samples from both the State of Punjab, India and the United States
- 25 • Uniform laboratory testing for identification of kidney disease
- 26 • Comprehensive data collection on anthropomorphic measurements, laboratory  
27 measurements, comorbid conditions, and health behaviors

### 31 **Limitations:**

- 32 • Cross-sectional study design cannot establish causality
- 33 • Because the sample from India was only from one state, the Punjab, we cannot generalize  
34 our findings to all of India

## INTRODUCTION

The state of Punjab - indeed all of India, similar to other low and middle income countries (LMICs), is witnessing a disturbing growth in NCDs.[1] The country faces this epidemiologic transition while continuing to grapple with the problem of communicable diseases, which still remain a significant burden.[2] With this knowledge, the Department of Health and Family Welfare in Punjab, India, worked closely with the Post Graduate Institute of Medical Education and Research, Chandigarh, India, and medical colleges in the state to conduct the first representative survey of NCDs in the state of Punjab in 2014 and 2015.

The goal of this survey was to collect critical and up to date data on risk factors for NCDs in Punjab, with the hope of improving health planning and implementation of state initiatives, such as the National Program for Prevention and Control of Cancer, Diabetes, Cardiovascular disease and Stroke (NPCDCS).[3] This survey provides a wealth of data on both risk factors for kidney disease and kidney disease itself, comparable to data collected in the United States from the National Health and Nutrition Examination Survey (NHANES).

Previous work utilizing data from this source have shown an alarmingly high prevalence of hypertension (40.1%) and pre-hypertension (40.8%) in the region, with approximately 70% of these individuals being unaware of their condition.[4] Similarly, although less prevalent, diabetes was found in 8.3% (6.3% with pre-diabetes) participants, with only 18% of individuals being aware of their disease.[5] Since diabetes and hypertension are two of the key risk factors for kidney disease, we hypothesized that the state of Punjab may be experiencing or on the verge of experiencing a significant burden of kidney disease.

Therefore, in the current study we sought to examine the prevalence of CKD (using both low glomerular filtration rate and albuminuria criteria) and risk factors for CKD, comparing the

Punjab to a representative sample of individuals from the US National Health and Nutrition Examination Survey (NHANES). In addition, we also sought to compare the magnitude of the associations between risk factors and CKD in the two samples.

## MATERIALS AND METHODS

### Study Sample

The STEPS survey of non-communicable disease (NCD) risk factors was carried out from June 2014 to August 2015 in Punjab.[3] A multi-stage stratified sampling design was used to generate representative data for two age-groups (18-44, 45-69), sex, and area of residence in the state. A total of 5,127 adults, ages 18-69 years, participated in the survey. The overall response rate for STEP1/2 and STEP 3 was 95% and 93% respectively. Data were collected in three steps: Socio-demographic and behavioral information was collected in Step 1, physical measurements such as height, weight and blood pressure were done in Step 2, and biochemical measurements were undertaken to assess salt intake, blood glucose, triglycerides and cholesterol levels in Step 3. This analysis included individuals from STEP 3 of the survey, which was carried out in a subset of 2700 participants. The individuals used in STEP 3 were selected by taking a sub-sample of half of the study participants considering resource constraints. Every 2nd individual contacted for STEP 1 and 2 was subjected to STEP 3. A total of 2,002 individuals who had complete data on both albuminuria and serum creatinine were analyzed. Specific sample weights were available for the individuals included in STEP 3.

The US data for comparison were from the 2013-2014 National Health and Nutrition Examination Survey (NHANES), included 5,057 individuals. Multi-stage stratified sampling

1  
2  
3 design was used to collect data representative of the US general population. [6] The NHANES is  
4 supported by the National Center for Health Statistics and was designed to assess the health and  
5 nutritional status of adults and children in the United States. The study combines interviews,  
6 physical examinations, laboratory tests, and participant lifestyle surveys. Individuals between the  
7 ages of 18 and 69 years, with complete information on estimated glomerular filtration rate and  
8 albuminuria, were examined to match with the Punjab sample.  
9  
10  
11  
12  
13  
14  
15  
16  
17  
18  
19

## 20 **Patient and Public Involvement**

21  
22  
23 The research question was assessed using existing data taken from large, representative  
24 surveys, which contained more health questions and health measures than those presented in this  
25 work. The aim of the larger studies were to assess the overall health of each region, focused on  
26 diseases of global health impact, rather than individual patient priorities. The NHANES program  
27 began in the early 1960s, as a series of surveys focusing on different population groups or health  
28 topics over time. Participants were not involved in the design of the study, recruitment, or  
29 conduct of the study. NHANES participants receive their results from their examination as a  
30 preliminary report when leaving the exam center. A final report of findings is sent to each  
31 participant through the mail 12-16 weeks after their exam. Participants are free to discuss their  
32 results with their doctor and to keep for their own medical records.  
33  
34  
35  
36  
37  
38  
39  
40  
41  
42  
43  
44  
45

46 Similarly, the Punjab STEPS survey was a state-level public health effort undertaken to  
47 estimate the burden of many non-communicable diseases in that region. The government funded  
48 study, similar to NHANES did not enlist patient opinion during study design, but did have a plan  
49 to provide results to participants if abnormal and warranting medical follow-up.  
50  
51  
52  
53  
54  
55  
56  
57  
58  
59  
60

## Measures

In the Punjab, collection of blood and urine samples were done in the mornings, after participants had fasted overnight. Samples were centrifuged using a mini-centrifuge and separated serum was stored in ice boxes then transferred daily to a nearest public health institute with facility for  $-20^{\circ}$  C storage. Samples were transported to the central laboratory weekly. Collection of all the biochemical tests was at household level. Urine albumin-to-creatinine ratio was performed as a point-of-care field test using the URS 2AC strip that tests for 2 parameters microalbumin and creatinine (Biosense Technologies, Thane, Maharashtra, India). Calibration of the instruments and validation of field testing kits in a proportion of samples, was performed by the central biochemistry laboratory at PGIMER, Chandigarh per their standard protocol. Point-of-care field testing has been validated previously. [7,8] Laboratory measurements of serum creatinine (IDMS standardized assays) were made on Modular P 800 autoanalyzer (Roche Diagnostics, Germany) using commercially available kits (Roche Diagnostics, Germany). In the US NHANES sample, urine samples were processed, stored, and shipped to University of Minnesota, Minneapolis, MN for analysis. Detailed instructions on specimen collection and processing are discussed in the NHANES Laboratory Procedures Manual (LPM - [https://wwwn.cdc.gov/nchs/data/nhanes/2015-2016/manuals/2016\\_MEC\\_Laboratory\\_Procedures\\_Manual.pdf](https://wwwn.cdc.gov/nchs/data/nhanes/2015-2016/manuals/2016_MEC_Laboratory_Procedures_Manual.pdf)). Vials were stored under appropriate frozen ( $-30^{\circ}$ C) conditions until they are shipped to University of Minnesota for testing. The NHANES quality assurance and quality control (QA/QC) protocols meet the 1988 Clinical Laboratory Improvement Act mandates. Detailed QA/QC instructions are discussed in the NHANES LPM. A solid-phase fluorescent immunoassay was employed for the measurement



1  
2  
3 of human urinary albumin is described by Chavers et al. [9] Contract laboratories randomly  
4 perform repeat testing on 2% of all specimens.  
5  
6

7         Kidney function was assessed by estimated glomerular filtration rate (eGFR), calculated  
8 with using the CKD-Epi formula in both samples, employing the coefficients for White race in  
9 India.[10] Albuminuria was defined as a urine albumin to creatinine ratio (ACR) > 30 mg/g.  
10  
11 Kidney disease was also assessed using the KDIGO risk categories, which places individuals into  
12 four risk groups for mortality based on their eGFR and ACR levels (low risk: eGFR > 60 and  
13 ACR < 30; moderately high risk: eGFR 45-59 with ACR < 30 or eGFR > 60 with ACR 30-300;  
14 high risk: eGFR 30-44 with ACR < 30, eGFR 45-59 with ACR 30-300, or eGFR > 60 with ACR  
15 > 300; or very high risk: eGFR < 30, eGFR 30-44 with ACR > 30, or eGFR 45-59 with ACR >  
16 300.[11]  
17  
18  
19  
20  
21  
22  
23  
24  
25  
26  
27

28         Risk factors for kidney disease were defined similarly between the two samples. Diabetes  
29 was defined by presence of any of the following: being told by a doctor they had diabetes, taking  
30 medication for diabetes (including medication from traditional healers in India), or fasting  
31 glucose > 126 mg/dl. Hypertension was defined as any of the following: being told by a doctor  
32 they had hypertension, taking medications for hypertension, or having systolic blood pressure  
33 (SBP) > 140mmHg or diastolic blood pressure (DBP) > 90mmHg.  
34  
35  
36  
37  
38  
39  
40  
41

42         BMI was examined as both continuous and categorical to investigate different cut-points  
43 for identifying obesity between samples, in an attempt to account for the differences in stature. In  
44 the US, the WHO definition was employed where underweight was defined as BMI < 18.5,  
45 normal weight as BMI 18.5 – 24.99, overweight as BMI 25 – 29.99, and obese as BMI ≥ 30  
46 kg/m<sup>2</sup>. In Punjab obesity was defined using the same criteria as other published papers using this  
47  
48  
49  
50  
51  
52  
53  
54  
55  
56  
57  
58  
59  
60

1  
2  
3 survey data with underweight being defined as BMI < 18.5, normal weight as BMI 18.5 – 22.99,  
4  
5 overweight as BMI 23 – 26.99, and obese as BMI  $\geq 27$  kg/m<sup>2</sup>. [1-3]  
6  
7  
8  
9

## 10 **Statistical Analysis**

13 Demographic, socio-economic, anthropometric, health status, and markers of kidney  
14 disease were compared between counties using sample weighted t-tests for means or Chi-square  
15 tests for categorical variables. ACR was expressed as the median value due to its highly right-  
16 skewed nature. Associations between patient characteristics and risk factors for kidney disease  
17 with laboratory markers of kidney disease were modeled using modified Poisson regression with  
18 robust errors. This modeling approach was chosen, as opposed to logistic regression, because it  
19 yields estimates of prevalence ratios (PRs), rather than odds ratios. [12,13] PR estimates were  
20 determined for the kidney disease risk factors within each country in a single model using  
21 interactions between a country indicator variable and each measure. PR estimates for variables  
22 other than BMI, where two parameterizations were examined, were taken from the model with  
23 BMI modeled as a continuous variable.  
24  
25  
26  
27  
28  
29  
30  
31  
32  
33  
34  
35  
36  
37

38 To compare the effect of different adjustments on the association between cohort and the  
39 markers of kidney disease, models are presented unadjusted, adjusted for demographics, and  
40 fully adjusted. Age and sex were considered as demographic variables. A sensitivity analysis was  
41 performed for each kidney disease marker, stratifying the models by sex.  
42  
43  
44  
45  
46  
47

48 Analysis of de-identified data received from the Punjab WHO Steps Survey for this study  
49 was deemed IRB exempt by the University of Michigan IRB. NHANES data is publically  
50 available for use by researchers and does not require an IRB approval.  
51  
52  
53  
54  
55  
56  
57

## RESULTS

Many differences exist between individuals in Punjab and the US, as shown in Table 1. The mean age was approximately four years younger in Punjab ( $p<0.0001$ ), with a higher proportion of men (58.2% vs. 48.9%,  $p<0.0001$ ) compared with the US. The US had a much higher percentage of both high school or higher education and private health insurance coverage ( $p<0.0001$ ). Overall body size was very different, with Punjab residents being 6 cm shorter, weighing 18 kilograms less, having 10 cm smaller waist circumference, and BMI lower by 4.6  $\text{kg}/\text{m}^2$  (all  $p<0.0001$ ). Comparison of obesity by categories showed a higher percentage of individuals in Punjab as underweight (11.3% vs. 1.5% in the US) and a higher proportion of obese individuals in the US (37.9% vs. 28.9%,  $p<0.0001$ ), while proportions of those in the normal or overweight categories were very similar. While smoking was higher in the US, hypertension was much more common in Punjab (48.2% vs. 33.4%,  $p<0.0001$ ). No differences were seen in the prevalence of diabetes, cardiovascular disease, or triglyceride levels, although the US had higher total cholesterol levels (4.9 vs. 3.9  $\text{mmol}/\text{L}$  [189 vs. 150  $\text{mg}/\text{dL}$ ] in Punjab,  $p<0.0001$ ).

**Table 1: Comparison of Weighted Survey Sample Participant Characteristics between the Adult Populations in the State of Punjab, India and the United States**

| Measure                               | Punjab (2014-2015) |                | US (2013-2014) |                | P value |
|---------------------------------------|--------------------|----------------|----------------|----------------|---------|
|                                       | N                  | Mean (SE) or % | N              | Mean (SE) or % |         |
| Age (years)                           | 2,002              | 38.3 (0.60)    | 5,057          | 42.5 (0.38)    | <0.0001 |
| Male (%)                              | 2,002              | 58.2%          | 5,057          | 48.9%          | 0.0001  |
| Education to high school or above (%) | 2,002              | 43.4%          | 4,718          | 85.3%          | <0.0001 |
| Health Insurance (%)                  | 2,002              | 6.2%           | 5,052          | 79.8%          | <0.0001 |
| Height (cm)                           | 1,986              | 163.0 (0.37)   | 5,008          | 169.0 (0.31)   | <0.0001 |
| Weight (Kg)                           | 1,993              | 65.4 (0.6)     | 5,006          | 83.5 (0.54)    | <0.0001 |
| BMI (kg/m <sup>2</sup> ) *            | 1,982              | 24.6 (0.23)    | 5,000          | 29.2 (0.20)    | <0.0001 |
| Underweight                           | 1,982              | 11.3           | 5,000          | 1.5            | <0.0001 |
| Normal                                |                    | 29.5           |                | 29.1           |         |
| Overweight                            |                    | 30.3           |                | 31.5           |         |
| Obese                                 |                    | 28.9           |                | 37.9           |         |
| Waist (cm)                            | 1,995              | 89.0 (0.62)    | 4,836          | 98.8 (0.38)    | <0.0001 |
| Current smoker (%)                    | 2,002              | 7.5%           | 5,057          | 21.6%          | <0.0001 |
| Diabetes (%)                          | 1,043              | 7.7%           | 5,057          | 8.9%           | 0.42    |
| Hypertension (%)                      | 2,000              | 48.2%          | 5,057          | 33.4%          | <0.0001 |
| CVD (%)                               | 1,989              | 4.6%           | 5,057          | 3.4%           | 0.08    |
| Triglyceride (mmol/L)                 | 2,001              | 1.4 (0.04)     | 2,294          | 1.4 (0.04)     | 0.35    |
| Total cholesterol (mmol/L)            | 2,002              | 3.9 (0.06)     | 4,812          | 4.9 (0.02)     | <0.0001 |
| Serum Creatinine (µmol/L)             | 2,002              | 61.9 (0.9)     | 4,798          | 77.8 (0.9)     | <0.0001 |
| eGFR (mL/min/1.73m <sup>2</sup> )     | 2,002              | 114.8 (1.1)    | 4,798          | 97.8 (0.6)     | <0.0001 |
| eGFR < 60 ml/min/1.73m <sup>2</sup>   | 2,002              | 2.0%           | 4,798          | 3.8%           | <0.0001 |
| Urine Albumin (g/L; median)           | 1,928              | 0.2 (0.03)     | 4,971          | 0.07 (0.002)   | <0.0001 |
| Urine Creatinine (µmol/L; median)     | 1,928              | 7,242 (265)    | 4,971          | 9,275 (292)    | <0.0001 |
| ACR (mg/mmol; median) <sup>±</sup>    | 1,928              | 2.5 (0.25)     | 4,971          | 0.66 (0.007)   | <0.0001 |
| ACR > 3 mg/mmol                       | 1,928              | 46.7%          | 4,971          | 8.9%           | <0.0001 |

CVD: cardiovascular disease.

eGFR: estimated glomerular filtration rate.

ACR: urine albumin: creatinine ratio.

\* Different BMI cut-points used for obesity:

US: Underweight < 18.5, normal = 18.5 - 24.9, overweight = 25 - 29.9, obese 30+

India: Underweight < 18, normal = 18 - 22.9, overweight = 23 - 24.9, obese 25+

<sup>±</sup> Median employed to examine differences in urine measurements due to high degree of risk-skew.

Although Punjab had a lower prevalence of eGFR < 60 ml/min/1.73m<sup>2</sup> (2.0% vs. 3.8%, p<0.0001), the prevalence of albuminuria was five times higher (46.7% vs. 8.9%, p<0.0001).

1  
2  
3 When assessing kidney function using the KDIGO risk categories (Table 2), the high prevalence  
4 of high UACR lead to 46.2% of participants in Punjab being classified as “moderately high risk”,  
5 compared to only 9.1% in the US. In contrast, Punjab had only 1.4% in the “high risk” or  
6 “extremely high risk” groups compared to 2.1% in the US (Figure 1).  
7  
8  
9  
10  
11  
12  
13  
14  
15  
16  
17  
18  
19  
20  
21  
22  
23  
24  
25  
26  
27  
28  
29  
30  
31  
32  
33  
34  
35  
36  
37  
38  
39  
40  
41  
42  
43  
44  
45  
46  
47  
48  
49  
50  
51  
52  
53  
54  
55  
56  
57  
58  
59  
60

For peer review only

Table 2: Prevalence of Albuminuria and eGFR KDIGO Risk Categories among Adults in Punjab and United States

| Punjab, India                                                |     |                         |       | Albuminuria categories     |                             |                          | Total            |
|--------------------------------------------------------------|-----|-------------------------|-------|----------------------------|-----------------------------|--------------------------|------------------|
|                                                              |     |                         |       | A1                         | A2                          | A3                       |                  |
|                                                              |     |                         |       | Normal to mildly increased | Moderately increased        | Severely increased       |                  |
|                                                              |     |                         |       | <30 mg/g<br><3 mg/mmol     | 30-300 mg/g<br>3-30 mg/mmol | >300 mg/g<br>>30 mg/mmol |                  |
| GFR categories <sup>2</sup><br>(ml/min/1.73 m <sup>2</sup> ) | G1  | Normal to high          | ≥90   | 46.7 (40.7-52.6)           | 42.0 (35.3-48.7)            | 0.2 (0-0.7)              | 88.9 (86.0-91.8) |
|                                                              | G2  | Mildly decreased        | 60-89 | 5.7 (3.6-7.6)              | 3.5 (2.4-4.7)               | 0                        | 9.2 (6.8-11.5)   |
|                                                              | G3a | Mildly to mod decreased | 45-59 | 0.7 (0.1-1.3)              | 0.5 (0-1.0)                 | 0                        | 1.2 (0.3-2.1)    |
|                                                              | G3b | Mod to severe decreased | 30-44 | 0.3 (0-0.7)                | 0.5 (0-1.1)                 | 0                        | 0.8 (0.1-1.5)    |
|                                                              | G4  | Severely decreased      | 15-29 | 0.03 (0-0.08)              | 0.01 (0-0.02)               | 0                        | 0.04 (0-0.09)    |
|                                                              | G5  | Kidney failure          | <15   | 0                          | 0                           | 0                        | 0                |
| <b>Total</b>                                                 |     |                         |       | <b>53.4 (46.3-60.2)</b>    | <b>46.5 (39.5-53.5)</b>     | <b>0.2 (0-0.7)</b>       | <b>100</b>       |
| United States                                                |     |                         |       | Albuminuria categories     |                             |                          | Total            |
|                                                              |     |                         |       | A1                         | A2                          | A3                       |                  |
|                                                              |     |                         |       | Normal to mildly increased | Moderately increased        | Severely increased       |                  |
|                                                              |     |                         |       | <30 mg/g<br><3 mg/mmol     | 30-300 mg/g<br>3-30 mg/mmol | >300 mg/g<br>>30 mg/mmol |                  |
| GFR categories <sup>2</sup><br>(ml/min/1.73 m <sup>2</sup> ) | G1  | Normal to high          | ≥90   | 60.7 (58.1-63.1)           | 4.8 (4.0-5.6)               | 0.5 (0.3-0.7)            | 66.0 (63.1-68.9) |
|                                                              | G2  | Mildly decreased        | 60-89 | 28.1 (25.6-30.7)           | 2.2 (1.5-2.7)               | 0.1 (0.05-0.2)           | 30.4 (27.7-33.1) |
|                                                              | G3a | Mildly to mod decreased | 45-59 | 2.1 (1.4-2.7)              | 0.4 (0.2-0.7)               | 0.2 (0-0.3)              | 2.7 (1.9-3.5)    |
|                                                              | G3b | Mod to severe decreased | 30-44 | 0.3 (0.1-0.4)              | 0.2 (0.03-0.4)              | 0.1 (0.02-0.2)           | 0.6 (0.4-0.8)    |
|                                                              | G4  | Severely decreased      | 15-29 | 0.05 (0.0-0.1)             | 0.05 (0.01-1.0)             | 0.09 (0-0.2)             | 0.2 (0.05-0.3)   |
|                                                              | G5  | Kidney failure          | <15   | 0                          | 0.06 (0-0.2)                | 0.07 (0.01-0.1)          | 0.1 (0.01-0.3)   |
| <b>Total</b>                                                 |     |                         |       | <b>91.2 (90.0-92.5)</b>    | <b>7.7 (6.6-8.8)</b>        | <b>1.1 (0.8-1.3)</b>     | <b>100</b>       |

Green = Low Risk

Yellow = Moderately High Risk

13

Orange = High Risk

Red = Very High Risk

1  
2  
3 To compare the magnitude of association between traditional risk factors for CKD  
4  
5 between the two samples, we modeled prevalence ratios in each country within one model to  
6  
7 allow for the associations to be compared statistically (Table 3). When examining low eGFR (<  
8  
9 60 ml/min/1.73m<sup>2</sup>) as the outcome, male participants in Punjab showed a much lower prevalence  
10  
11 compared with females (prevalence ratio: PR=0.22, p=0.007); while no association was seen in  
12  
13 the US between sex and low eGFR (PR=1.09, p=0.56). These associations were significantly  
14  
15 different from each other with p=0.006. Another difference between the associations and  
16  
17 outcome was seen for hypertension (p=0.008), where a non-significant lower prevalence ratio  
18  
19 was observed in Punjab (PR=0.75, p=0.43) and a strong positive association was seen in the US  
20  
21 (PR=2.24, p<0.0001). Similar positive associations were seen in both samples for older age,  
22  
23 higher education level, CVD, and DM on the prevalence of low eGFR (Table 3a).  
24  
25  
26  
27

28 Table 3b displays the associations between patient factors and the prevalence of  
29  
30 albuminuria. Significant differences between the samples was again seen with sex and the  
31  
32 outcome (p=0.02). No association between sex and albuminuria was seen in Punjab, where in the  
33  
34 US males had a lower prevalence of albuminuria (PR=0.77, p=0.004). While in both samples  
35  
36 hypertension and DM were associated with a higher prevalence of albuminuria, the magnitude of  
37  
38 association was much stronger in the US (PR=1.19 in Punjab vs. PR=1.93 in the US for  
39  
40 hypertension and PR=1.32 in Punjab vs. PR=2.54 in the US for DM). Current smoking was  
41  
42 associated with albuminuria only in the US (PR=1.34, p=0.002), while higher total cholesterol  
43  
44 was associated with albuminuria in the Punjab (PR=1.11 per 0.5 mmol/L higher total  
45  
46 cholesterol).  
47  
48  
49  
50  
51  
52  
53  
54  
55  
56  
57  
58  
59  
60

When combining low eGFR and albuminuria into a composite (CKD) outcome (Table 3c) more differences were found between the samples in certain associations. Significantly larger associations were found in the US for the relationship between older age, hypertension, DM, and BMI; while a larger association was seen between total cholesterol and the composite CKD measure in the Punjab.

**Table 3: Prevalence Ratios for Markers of CKD by Risk Factors**

A. Low eGFR (eGFR < 60 ml/min/1.73m<sup>2</sup>)

| Measure                                          | Punjab |             |        | US   |              |             | P-value for interaction |
|--------------------------------------------------|--------|-------------|--------|------|--------------|-------------|-------------------------|
|                                                  | PR     | 95% CI      | P      | PR   | 95% CI       | P           |                         |
| US (vs. Punjab)                                  | 1.00   | -           | -      | 0.05 | 0.004 – 0.71 | <b>0.03</b> | -                       |
| Age (per 10 years)                               | 1.73   | 1.29 – 2.31 | 0.0002 | 2.14 | 1.82 – 2.52  | <0.0001     | 0.20                    |
| Male (vs. Female)                                | 0.22   | 0.07 – 0.66 | 0.007  | 1.09 | 0.81 – 1.47  | 0.56        | <b>0.006</b>            |
| Education high school + (vs. no)                 | 1.86   | 0.84 – 4.10 | 0.13   | 1.53 | 1.06 – 2.20  | 0.02        | 0.66                    |
| Current smoker (vs. no)                          | 2.32   | 0.31 – 1.74 | 0.41   | 0.92 | 0.63 – 1.34  | 0.66        | 0.38                    |
| Hypertension (vs. no)                            | 0.75   | 0.37 – 1.52 | 0.43   | 2.24 | 1.51 – 3.33  | <0.0001     | <b>0.008</b>            |
| DM (vs. no)                                      | 2.75   | 1.17 – 6.48 | 0.02   | 1.76 | 1.27 – 2.44  | 0.0007      | 0.34                    |
| CVD (vs. no)                                     | 1.11   | 0.34 – 3.60 | 0.87   | 1.98 | 1.20 – 1.38  | 0.0002      | 0.35                    |
| Total Cholesterol (per 20 mg/dl, per 0.5 mmol/L) | 1.09   | 0.73 – 1.64 | 0.67   | 0.92 | 0.76 – 1.11  | 0.36        | 0.44                    |
| BMI (per 5 Kg/m <sup>2</sup> )                   | 0.82   | 0.59 – 1.15 | 0.25   | 1.13 | 1.04 – 1.23  | 0.006       | 0.07                    |
| Obesity:                                         |        |             |        |      |              |             |                         |
| Underweight                                      | 1.24   | 0.26 – 5.95 | 0.79   | 1.45 | 0.36 – 5.89  | 0.60        | 0.88                    |
| Healthy weight                                   | 1.00   | -           | ref    | 1.00 | -            | ref         |                         |
| Overweight                                       | 2.63   | 1.09 – 6.34 | 0.03   | 1.31 | 0.83 – 2.07  | 0.25        | 0.17                    |
| Obese                                            | 0.73   | 0.27 – 1.95 | 0.53   | 1.40 | 0.91 – 2.14  | 0.13        | 0.23                    |



## B. Albuminuria (ACR &gt; 30 mg/g, 3 mg/mmol)

| Measure                                          | Punjab |             |        | US   |             |         | P-value for interaction |
|--------------------------------------------------|--------|-------------|--------|------|-------------|---------|-------------------------|
|                                                  | PR     | 95% CI      | P      | PR   | 95% CI      | P       |                         |
| US (vs. Punjab)                                  | 1.00   | -           | -      | 0.18 | 0.08 – 0.38 | <0.0001 | -                       |
| Age (per 10 years)                               | 1.03   | 0.99 – 1.08 | 0.16   | 1.06 | 0.98 – 1.14 | 0.15    | 0.60                    |
| Male (vs. Female)                                | 0.99   | 0.88 – 1.12 | 0.93   | 0.77 | 0.65 – 0.92 | 0.004   | <b>0.02</b>             |
| Education high school + (vs. no)                 | 0.99   | 0.88 – 1.11 | 0.80   | 0.81 | 0.67 – 0.98 | 0.03    | 0.09                    |
| Current smoker (vs. no)                          | 1.09   | 0.85 – 1.40 | 0.48   | 1.35 | 1.11 – 1.63 | 0.002   | 0.20                    |
| Hypertension (vs. no)                            | 1.19   | 1.06 – 1.34 | 0.005  | 1.93 | 1.59 – 2.36 | <0.0001 | <b>&lt;0.0001</b>       |
| DM (vs. no)                                      | 1.32   | 1.12 – 1.56 | 0.0008 | 2.54 | 2.07 – 3.13 | <0.0001 | <b>&lt;0.0001</b>       |
| CVD (vs. no)                                     | 1.14   | 0.92 – 1.37 | 0.24   | 1.32 | 1.16 – 0.99 | 0.06    | 0.37                    |
| Total Cholesterol (per 20 mg/dl, per 0.5 mmol/L) | 1.11   | 1.04 – 1.17 | 0.001  | 0.99 | 0.90 – 1.09 | 0.81    | <b>0.05</b>             |
| BMI (per 5 Kg/m <sup>2</sup> )                   | 0.99   | 0.94 – 1.03 | 0.54   | 1.04 | 0.98 – 1.10 | 0.19    | 0.16                    |
| Obesity:                                         |        |             |        |      |             |         |                         |
| Underweight                                      | 0.90   | 0.72 – 1.11 | 0.32   | 1.20 | 0.56 – 2.56 | 0.64    | 0.47                    |
| Healthy weight                                   | 1.00   | -           | ref    | 1.00 | -           | ref     | -                       |
| Overweight                                       | 0.95   | 0.82 – 1.10 | 0.48   | 0.93 | 0.72 – 1.18 | 0.53    | 0.85                    |
| Obese                                            | 0.95   | 0.83 – 1.09 | 0.48   | 1.01 | 0.80 – 1.27 | 0.96    | 0.68                    |

## C. CKD (low eGFR or Albuminuria)

| Measure                                          | Punjab |             |        | US   |             |         | P-value for interaction |
|--------------------------------------------------|--------|-------------|--------|------|-------------|---------|-------------------------|
|                                                  | PR     | 95% CI      | P      | PR   | 95% CI      | P       |                         |
| US (vs. Punjab)                                  | 1.00   | -           | -      | 0.11 | 0.05 – 0.22 | <0.0001 | -                       |
| Age (per 10 years)                               | 1.04   | 1.00 – 1.09 | 0.06   | 1.20 | 1.12 – 1.29 | <0.0001 | <b>0.0007</b>           |
| Male (vs. Female)                                | 0.97   | 0.86 – 1.09 | 0.58   | 0.81 | 0.70 – 0.94 | 0.007   | 0.0686                  |
| Education high school + (vs. no)                 | 1.00   | 0.90 – 1.12 | 0.96   | 0.91 | 0.77 – 1.09 | 0.31    | 0.379                   |
| Current smoker (vs. no)                          | 1.09   | 0.85 – 1.40 | 0.49   | 1.26 | 1.06 – 1.49 | 0.008   | 0.3526                  |
| Hypertension (vs. no)                            | 1.18   | 1.05 – 1.33 | 0.006  | 1.87 | 1.57 – 2.23 | <0.0001 | <b>&lt;0.0001</b>       |
| DM (vs. no)                                      | 1.35   | 1.16 – 1.58 | 0.0002 | 2.11 | 1.77 – 2.53 | <0.0001 | <b>0.0002</b>           |
| CVD (vs. no)                                     | 1.13   | 0.94 – 1.37 | 0.19   | 1.49 | 1.12 – 1.18 | 0.0006  | 0.072                   |
| Total Cholesterol (per 20 mg/dl, per 0.5 mmol/L) | 1.09   | 1.04 – 1.16 | 0.002  | 0.97 | 0.88 – 1.05 | 0.41    | <b>0.02</b>             |
| BMI (per 5 Kg/m <sup>2</sup> )                   | 0.98   | 0.94 – 1.03 | 0.48   | 1.06 | 1.01 – 1.12 | 0.017   | <b>0.025</b>            |
| Obesity:                                         |        |             |        |      |             |         |                         |
| Underweight                                      | 0.89   | 0.72 – 1.10 | 0.28   | 1.31 | 0.67 – 2.54 | 0.43    | 0.28                    |
| Healthy weight                                   | 1.00   | -           | ref    | 1.00 | -           | ref     | -                       |
| Overweight                                       | 0.98   | 0.86 – 1.13 | 0.81   | 0.98 | 0.79 – 1.22 | 0.84    | 0.97                    |
| Obese                                            | 0.95   | 0.83 – 1.09 | 0.48   | 1.06 | 0.86 – 1.29 | 0.60    | 0.41                    |

Unadjusted and less fully adjusted models are presented in Supplemental Tables 1-3 for each of the kidney disease markers. As shown in Figure 2, which displays the changes in prevalence ratios comparing US to Punjab for each marker of CKD for different levels of adjustments, only low eGFR showed a marked change. . Before accounting for any differences in participants in the two studies, the prevalence of low eGFR was much higher in the US

1  
2  
3 (PR=2.16), but after accounting for demographics (age and sex) and other health measures  
4  
5 (remaining covariates), the US has a much lower prevalence of low eGFR compared to Punjab  
6  
7 (PR=0.13 and 0.05, respectively), suggesting that if the US had the same patient make up as  
8  
9 Punjab, the prevalence of low eGFR would be much lower. The findings for albuminuria and any  
10  
11 CKD were very similar in showing that before adjustment the prevalence of either marker was  
12  
13 much lower in the US (PR=0.24 and 0.29, respectively) and accounting for difference in  
14  
15 demographics and health measures between the samples changed these estimates very little.  
16  
17 These results suggest that traditional risk factors do not entirely explain the difference in  
18  
19 prevalence seen among markers of kidney disease between the US and Punjab.  
20  
21  
22

23  
24 In a sensitivity analysis, examining the association between risk factors and each kidney  
25  
26 marker separately by sex, no significant changes in association direction or magnitude were  
27  
28 detected (data not shown).  
29  
30  
31

## 32 33 **DISCUSSION**

34  
35  
36 In comparing two representative samples of participants from the adult population of  
37  
38 Punjab, India and the United States, we found a very high prevalence of albuminuria in the  
39  
40 Punjab, with almost half of the residents with urine ACR > 3 mg/mmol (30 mg/g). This is in  
41  
42 contrast to the prevalence of albuminuria in the US of approximately 9%. When examining  
43  
44 glomerular filtration rate, the Punjab had much higher average eGFR and a lower prevalence of  
45  
46 eGFR < 60 ml/min/1.73m<sup>2</sup> (2.0% vs. 3.8%). Because of the high prevalence of albuminuria in  
47  
48 the Punjab, almost half the population falls into the “moderately high risk” CKD risk category  
49  
50 per KDIGO risk stratification criteria. Even more striking is the fact that the between country  
51  
52  
53  
54  
55  
56

1  
2  
3 differences in the prevalence estimates of albuminuria could not be explained by traditional risk  
4 factors for CKD, such as age, hypertension, and diabetes.  
5  
6

7  
8 If true, these findings have enormous public health and resource implications for a low-  
9 middle income country such as India, specifically in the realm of CKD, cardiovascular disease  
10 and other NCDs. Currently there are no definitive estimates of prevalence of chronic kidney  
11 disease in India, as there is no ongoing national kidney registry/surveillance system. Recent  
12 publications have suggested that 220,000 patients are diagnosed with ESRD every year.[14] It is  
13 estimated that this will result in demand for an additional 34 million dialysis sessions in India  
14 each year. Besides the growing population of patients with kidneys disease, the country is faced  
15 with a shortage of nephrologists, late referral of patients, inadequate health awareness about  
16 preventive measures, and a lack of more cost-effective alternatives like renal transplantation or  
17 peritoneal dialysis (PD).[14] It has been estimated that 70% of those who start dialysis in India  
18 eventually give up dialysis due to financial constraints or death.[15] The health care system, with  
19 most out-of-pocket expenditures borne by the households pose significant barriers to accessing  
20 health services with approximately 60 million households pushed below the poverty line in India  
21 as a result each year.[16]  
22  
23  
24  
25  
26  
27  
28  
29  
30  
31  
32  
33  
34  
35  
36  
37  
38  
39

40 We believe that our finding of the discordance observed in the prevalence of albuminuria  
41 versus lower eGFR between India and the US could be in part due to the epidemiologic transition  
42 that is occurring in countries such as India, where early evidence of kidney damage but lower  
43 prevalence of low eGFR defined kidney disease or end stage kidney disease, may be the result of  
44 higher death rates among the younger population from premature cardiovascular disease, so  
45 while early kidney disease evidenced by albuminuria is more common, prevalence of later stages  
46 of kidney disease is lower (but potentially rising). Although not to the same degree, we reported  
47  
48  
49  
50  
51  
52  
53  
54  
55  
56  
57  
58  
59  
60

1  
2  
3 similar findings in a recent study comparing CKD between China and the US.[17] China, another  
4 country which has gone through great economic and population growth in recent years, displayed  
5 a low prevalence of advanced kidney disease (eGFR < 60 ml/min/1.73m<sup>2</sup>), but a higher  
6 prevalence of albuminuria than the US. The strength of association between traditional risk  
7 factors, such as hypertension and diabetes, were also weaker among the Chinese sample,  
8 although the association between age and CKD prevalence was much stronger.  
9

10  
11 Supportive evidence for a high rate of albuminuria in India have been reported from the  
12 western state of Gujarat. [18] This study represents a voluntary sample of participants who were  
13 screened during a World Kidney Day Screening Camp. Even though the investigators excluded  
14 individuals at risk of albuminuria (participants with known diabetes, stone diseases,  
15 hypertension, kidney/liver/cardiac disease, hepatitis, HIV, transplant recipients, pregnant women  
16 and those < 18 years of age), they estimated a 13.8% prevalence of albuminuria in their study.  
17 This is higher than in the US general population random sample in NHANES, which includes the  
18 individuals most likely to have albuminuria.  
19

20  
21 The high prevalence of albuminuria in Punjab could be related to the metabolic syndrome  
22 known to be associated with albuminuria. [19] In this context, insulin resistance and visceral  
23 adiposity are common in developing nations and mechanistically linked with the metabolic  
24 syndrome through adipocytokines and inflammation. [20] The high prevalence of premature  
25 cardiovascular disease and hypertension can be accompanied by albuminuria from vascular  
26 dysfunction or damage, leading to disruption of the glomerular filtration barrier. Furthermore,  
27 the evidence linking kidney disease to environmental factors continues to grow. [21] Air  
28 pollution (highly prevalent in that part of the world), is associated with both endothelial  
29 dysfunction and low grade inflammation with resultant albuminuria. In the US, PM2.5 levels  
30  
31  
32  
33  
34  
35  
36  
37  
38  
39  
40  
41  
42  
43  
44  
45  
46  
47  
48  
49  
50  
51  
52  
53  
54  
55  
56  
57  
58  
59  
60

1  
2  
3 have been linked to the prevalence of CKD, risk of incident CKD, and its progression.[22,23]  
4  
5 This association is also being explored outside the US with findings published from Taiwan and  
6  
7 Korea showing similar results.[24-26] India currently has some of the highest levels of air  
8  
9 pollution in the world. It is estimated that 1.5 million people died from the effects of air pollution  
10  
11 in 2012. [27,28] While less studied, it is also plausible that kidney disease may be influenced by  
12  
13 pollutants in both the water and soil as well, similar to the factors potentially underlying the  
14  
15 epidemic of CKD of unknown etiology, although this has not been reported from northern India,  
16  
17 and albuminuria is not the hallmark of this latter condition. [29]  
18  
19  
20

21  
22 Unless actions are undertaken now to further investigate and reduce the high rate of  
23  
24 albuminuria (albeit based on single cross-sectional estimates) reported in this study, the  
25  
26 infrastructure and economy in India will be faced with a daunting task of needing to care for an  
27  
28 increasing burden of those progressing to ESRD, in the not too distant future. Further, since  
29  
30 albuminuria is also a marker of endothelial dysfunction and has been linked to cardiovascular  
31  
32 outcomes, even at low levels, the higher risk of premature cardiovascular disease needs to be  
33  
34 kept in mind in relation to albuminuria. [30-32]  
35  
36  
37

38 To the best of our knowledge, this is the first study to estimate kidney disease prevalence  
39  
40 at state level in India based on a random sample of the adult population living in a large,  
41  
42 populous, northern Indian state. Further, it is also the first to compare prevalence of CKD  
43  
44 between India and the US (after adjusting for patient characteristics around the same time period  
45  
46 in the two nations). However, it is not without limitations. Because the sample from India was  
47  
48 only from one state, the Punjab, we cannot generalize our findings to all of India. Although this  
49  
50 is a large state, the risk factor distribution and prevalence could be different in other areas of the  
51  
52 country.[33] In addition, the people, land and environment in India are diverse and of a highly  
53  
54  
55  
56

1  
2  
3 variegated nature with significant urban-rural differences. It should also be acknowledged that  
4 the Punjab STEPS survey is cross-sectional in design and while appropriately sampled to be  
5 representative of the state, may be limited by its sample size. The Punjab STEPS survey also  
6 employed commercially available point-of-care test strips, to assess albuminuria, whereas in the  
7 US, this was assessed on the urine collected in a central laboratory. Lastly, both NHANES and  
8 the Punjab STEPS survey checked albuminuria and serum creatinine at a single point in time,  
9 whereas the KDIGO definition of CKD requires demonstration of persistence of these  
10 abnormalities. We believe however, that repeat sampling of blood and urine in public health  
11 surveys, while highly desirable, is often difficult to achieve in the real world. Variations in  
12 albuminuria both within the same patient and across populations are possible; however, only  
13 single readings of albuminuria were available for each participant in this study.  
14  
15  
16  
17  
18  
19  
20  
21  
22  
23  
24  
25  
26  
27

28  
29 Future research to confirm our findings using repeat sampling and similar studies in other  
30 states, and further examination of the association between environmental factors and kidney  
31 disease in India is urgently warranted. Such studies would benefit from having population  
32 samples from multiple states, preferably be longitudinal in nature, and have the potential to  
33 examine multiple environmental factors, while accounting for the traditional risk factors for  
34 kidney disease.  
35  
36  
37  
38  
39  
40  
41

42  
43 In summary, we report very high prevalence of albuminuria in a large state (the Punjab)  
44 in northern India. Albuminuria is considered an early sign of kidney damage as well as may  
45 reflect endothelial dysfunction, a harbinger of atherosclerosis-related cardiovascular disease.  
46 Progression of this early stage kidney and cardiovascular disease elevates the potential for an  
47 epidemic of ESRD and higher rates of cardiovascular disease in a country undergoing rapid  
48 epidemiologic and economic transition. Urgent action and further research is needed to  
49  
50  
51  
52  
53  
54  
55  
56  
57  
58  
59  
60

1  
2  
3 determine the underlying cause(s) of these findings, in the hopes of stemming the tide of rising  
4 rates of kidney failure and cardiovascular disease. India must clearly prepare for an inevitable  
5 increase in the need for renal replacement therapy in the coming years.  
6  
7  
8  
9  
10  
11  
12  
13  
14  
15  
16  
17  
18  
19  
20  
21  
22  
23  
24  
25  
26  
27  
28  
29  
30  
31  
32  
33  
34  
35  
36  
37  
38  
39  
40  
41  
42  
43  
44  
45  
46  
47  
48  
49  
50  
51  
52  
53  
54  
55  
56  
57  
58  
59  
60

For peer review only



## COMPETING INTERESTS:

**Jennifer L. Bragg-Gresham:** None

**JS Thakur:** None

**Gursimer Jeet:** None

**Sanjay Jain:** None

**Arnab Pal:** None

**Rajendra Prasad:** None

**Subramaniam Pennathur:** None

**Rajiv Saran:** None

## CONTRIBUTION STATEMENT:

**Jennifer L. Bragg-Gresham:** Data analysis and interpretation, manuscript writing, tables/figures creation

**JS Thakur:** Study design (India), data collection, manuscript planning, manuscript review and editing

**Gursimer Jeet:** Study design, data collection and programming, manuscript review and editing

**Sanjay Jain:** Study design, manuscript review and editing

**Arnab Pal:** Study design, manuscript review and editing

**Rajendra Prasad:** Study design, manuscript review and editing

**Subramaniam Pennathur:** Manuscript review and editing

**Rajiv Saran:** Study concept, data interpretation, manuscript writing, manuscript review and editing

## FUNDING SOURCES

**Punjab:** We sincerely acknowledge the financial support by National Health Mission (Punjab), Ministry of Health and Family Welfare, Government of India and technical support of WHO with special thanks to Dr. Dharendra N Sinha, Regional Advisor (NCD and Tobacco Surveillance), WHO-SEARO and Dr. Lubna Bhatti, Epidemiologist, Prevention of Non-communicable Diseases (PND), World Health Organization, Geneva. Funding came from the National Health Mission, Punjab, India, JST. The funders had no role in study design, data collection and analysis, decision to publish, or preparation of the manuscript.

**US:** This work was supported in part by investigators working on the Supporting, Maintaining and Improving the Surveillance System for Chronic Kidney Disease in the U.S., Cooperative Agreement Number, U58 DP006254, funded by the Centers for Disease Control and Prevention. Its contents are solely the responsibility of the authors and do not necessarily represent the official position of the Centers for Disease Control and Prevention or the Department of Health and Human Services.

## ACKNOWLEDGEMENTS

**Punjab:** We appreciate the support from Department of Health and Family welfare, Punjab especially Professor. KK Talwar, Advisor (Health), Government of Punjab, Ms. Vini Mahajan, IAS, Principal Secretary, Department of Health and Family Welfare and Mr. Hussan Lal, IAS, Secretary, Medical Education and Mission Director, National Health Mission, Punjab for their

1  
2  
3 guidance and support for the project in conducting the study. Contributions by Biosense Pvt.  
4 Limited are acknowledged. We would like to thanks the members of Technical Advisory  
5  
6 Committee and chairperson Prof. SK Jindal who provided technical oversight for the designing  
7  
8 and implementation of survey. In addition inputs from advisors from University of Michigan  
9  
10 were valuable.  
11  
12  
13  
14  
15  
16

17 **US:** The CDC CKD Surveillance System team is has been led jointly by University of Michigan  
18 [Rajiv Saran (PI)]; University of California, San Francisco [Neil Powe (PI)], since 2006 and  
19 funded and supported by Centers for Disease Control and Prevention [Nilka Rios Burrows  
20 (Technical Advisor)].  
21  
22  
23  
24  
25  
26  
27  
28  
29  
30

## 31 **DATA SHARING STATEMENT**

32  
33

34 All US data from the National Health and Nutrition Examination Survey (NHANES) is  
35 publically available at <https://www.cdc.gov/nchs/nhanes/index.htm>. The Punjab data is available  
36  
37 by request and approval through collaborative agreements with the sponsors. Professor JS  
38  
39 Thakur is the Principal Investigator and can be contacted at [jsthakur64@gmail.com](mailto:jsthakur64@gmail.com).  
40  
41  
42  
43  
44  
45  
46  
47  
48  
49  
50  
51  
52  
53  
54  
55  
56  
57  
58  
59  
60

## FIGURE TITLES AND LEGENDS

**Figure 1: Distribution of KDIGO Risk Categories among Adults in Punjab, India and the United States**

**Figure 2: Changes in Prevalence Ratios between Punjab and the US for Markers of CKD with Different Levels of Adjustment for Risk Factors**

**A. Low eGFR**

**B. Albuminuria**

**C. Any CKD**

**Footnote:** Demographics = age, sex, and education & All = Demographics plus measures in Table 3 (Current smoker, Hypertension, DM, CVD, Total Cholesterol, Obesity as BMI categories)

## REFERENCES

1. Kundu MK, Hazra S, Pal D, Bhattacharya M. A review on Noncommunicable Diseases (NCDs) burden, its socio-economic impact and the strategies for prevention and control of NCDs in India. *Indian J Public Health*. 2018 Oct-Dec;62(4):302-304. doi: 10.4103/ijph.IJPH\_324\_16. PubMed PMID: 30539894.
2. India State-Level Disease Burden Initiative Collaborators. Nations within a nation: variations in epidemiological transition across the states of India, 1990-2016 in the Global Burden of Disease Study. *Lancet*. 2017 Dec 2;390(10111):2437-2460. doi: 10.1016/S0140-6736(17)32804-0. Epub 2017 Nov 14. Erratum in: *Lancet*. 2017 Dec 2;390(10111):e49. PubMed PMID: 29150201; PubMed Central PMCID: PMC5720596.
3. Thakur JS, Jeet G, Pal A, et al., Profile of Risk Factors for Non-Communicable Diseases in Punjab, Northern India: Results of a State-Wide STEPS Survey. *PLoS One*. 2016 Jul 7;11(7):e0157705. doi: 10.1371/journal.pone.0157705. eCollection 2016. PubMed PMID: 27389020; PubMed Central PMCID: PMC4936739.
4. Tripathy JP, Thakur JS, Jeet G, et al., Alarmingly high prevalence of hypertension and pre-hypertension in North India-results from a large cross-sectional STEPS survey. *PLoS One*. 2017 Dec 21;12(12):e0188619. doi: 10.1371/journal.pone.0188619. eCollection 2017. PubMed PMID: 29267338; PubMed Central PMCID: PMC5739392.
5. Tripathy JP, Thakur JS, Jeet G, et al., Prevalence and risk factors of diabetes in a large community-based study in North India: results from a STEPS survey in Punjab, India. *Diabetol Metab Syndr*. 2017 Jan 23;9:8. doi: 10.1186/s13098-017-0207-3. eCollection 2017. PubMed PMID:28127405; PubMed Central PMCID: PMC5259959.

- 1  
2  
3 6. Centers for Disease Control and Prevention (CDC). National Center for Health Statistics  
4 (NCHS). National Health and Nutrition Examination Survey Data. Hyattsville, MD: U.S.  
5 Department of Health and Human Services, Centers for Disease Control and Prevention,  
6 2013-2014.  
7  
8 <https://www.cdc.gov/nchs/nhanes/ContinuousNhanes/Default.aspx?BeginYear=2013>.  
9  
10  
11
- 12  
13 7. St John A, Tirimacco R, Badrick T, et al. Internet support for point-of-care testing in  
14 primary care. *Aust Fam Physician*. 2015;44(1-2):10-11,  
15  
16
- 17 8. Lim S, Yu HJ, Lee S, Park H, Kwon MJ, Woo HY. Evaluation of the URiSCAN 2 ACR  
18 Strip to estimate the urine albumin/creatinine ratios. *J Clin Lab Anal*. 2018;32(3):e22289.  
19  
20  
21  
22  
23  
24  
25  
26  
27  
28  
29  
30  
31  
32  
33  
34  
35  
36  
37  
38  
39  
40  
41  
42  
43  
44  
45  
46  
47  
48  
49  
50  
51  
52  
53  
54  
55  
56  
57  
58  
59  
60
10. Mulay AV, Gokhale SM. Comparison of serum creatinine-based estimating equations  
with gates protocol for predicting glomerular filtration rate in indian population. *Indian J  
Nephrol*. 2017 Mar-Apr;27(2):124-128. doi:10.4103/0971-4065.200515. PubMed PMID:  
28356664; PubMed Central PMCID: PMC5358152.
11. KDIGO: Kidney Disease: Improving Global Outcomes CKD Work Group. KDIGO 2012  
clinical practice guideline for the evaluation and management of chronic kidney disease.  
*Kidney Int Suppl* 2013;3(1):1–150.
12. Zou G. A modified Poisson regression approach to prospective studies with binary data.  
*Am J Epidemiol* 2004; 159(7):702-6.

- 1  
2  
3 13. Zou GY, Donner A. Extension of the modified Poisson regression model to prospective  
4 studies with correlated binary data. *Statist Methods in Med Res* 2013; 22(6):661-70.  
5  
6  
7  
8 14. Kaur G, Prinja S, Ramachandran R, Malhotra P, et al., Cost of hemodialysis in a public  
9 sector tertiary hospital of India. *Clin Kidney J.* 2018 Oct;11(5):726-733.  
10  
11  
12 15. Kher V. End-stage renal disease in developing countries. *Kidney Int.* 2002 Jul;62(1):350-  
13 62. PubMed PMID: 12081600.  
14  
15  
16 16. Balarajan Y, Selvaraj S, Subramanian SV. Health care and equity in India. *Lancet.* 2011  
17 Feb 5;377(9764):505-15. doi: 10.1016/S0140-6736(10)61894-6. Epub 2011 Jan 10.  
18 PubMed PMID: 21227492; PubMed Central PMCID: PMC3093249.  
19  
20  
21 17. Wang F, He K, Wang J, et al., Prevalence and Risk Factors for CKD: A Comparison  
22 Between the Adult Populations in China and the United States. *Kidney Int Rep.* 2018 Jun  
23 2;3(5):1135-1143. doi:  
24 10.1016/j.ekir.2018.05.011. eCollection 2018 Sep. PubMed PMID: 30197980; PubMed  
25 Central PMCID: PMC6127437.  
26  
27  
28 18. Trivedi H, Vanikar A, Patel H, et al. High prevalence of chronic kidney disease in a semi-  
29 urban population of Western India. *Clin Kidney J.* 2016;9(3):438-443.  
30 doi:10.1093/ckj/sfw009  
31  
32  
33 19. Rashidbeygi E, Safabakhsh M, Delshad Aghdam S, Mohammed SH, Alizadeh S.  
34 Metabolic syndrome and its components are related to a higher risk for albuminuria and  
35 proteinuria: Evidence from a meta-analysis on 10,603,067 subjects from 57 studies.  
36 *Diabetes Metab Syndr.* 2019;13(1):830-843. doi:10.1016/j.dsx.2018.12.006.  
37  
38  
39  
40  
41  
42  
43  
44  
45  
46  
47  
48  
49  
50  
51  
52  
53  
54  
55  
56  
57  
58  
59  
60

- 1  
2  
3 20. Kumari R, Kumar S, Kant R. An update on metabolic syndrome: Metabolic risk markers  
4 and adipokines in the development of metabolic syndrome. *Diabetes Metab Syndr*.  
5  
6 2019;13(4):2409-2417. doi:10.1016/j.dsx.2019.06.005.  
7  
8  
9  
10 21. Xu, X., Nie, S., Ding, H. et al. Environmental pollution and kidney diseases. *Nat Rev*  
11  
12 *Nephrol* 14, 313–324 (2018). <https://doi.org/10.1038/nrneph.2018.11>.  
13  
14  
15 22. Bragg-Gresham J, Morgenstern H, McClellan W, et al.; Centers for Disease Control and  
16  
17 Prevention CKD Surveillance System. County-level air quality and the prevalence of  
18  
19 diagnosed chronic kidney disease in the US Medicare population. *PLoS One*. 2018 Jul  
20  
21 31;13(7):e0200612. doi: 10.1371/journal.pone.0200612. eCollection 2018. PubMed  
22  
23 PMID: 30063741; PubMed Central PMCID: PMC6067706.  
24  
25  
26 23. Bowe B, Xie Y, Li T, et al., Particulate Matter Air Pollution and the Risk of Incident  
27  
28 CKD and Progression to ESRD. *J Am Soc Nephrol*. 2018 Jan;29(1):218-230. doi:  
29  
30 10.1681/ASN.2017030253. Epub 2017 Sep 21. PubMed PMID: 28935655; PubMed  
31  
32 Central PMCID: PMC5748906.  
33  
34  
35 24. Lin SY, Hsu WH, Lin CL, et. al., Association of Exposure to Fine-Particulate Air  
36  
37 Pollution and Acidic Gases with Incidence of Nephrotic Syndrome. *Int J Environ Res*  
38  
39 *Public Health*. 2018 Dec 14;15(12). pii: E2860. doi: 10.3390/ijerph15122860. PubMed  
40  
41 PMID: 30558173.  
42  
43  
44 25. Chan TC, Zhang Z, Lin BC, et al., Long-Term Exposure to Ambient Fine Particulate  
45  
46 Matter and Chronic Kidney Disease: A Cohort Study. *Environ Health Perspect*. 2018  
47  
48 Oct;126(10):107002. doi: 10.1289/EHP3304. PubMed PMID: 30392394.  
49  
50  
51 26. Kim HJ, Min JY, Seo YS, et al., Association between exposure to ambient air pollution  
52  
53 and renal function in Korean adults. *Ann Occup Environ Med*. 2018 Feb 28;30:14. doi:



1  
2  
3 10.1186/s40557-018-0226-z. eCollection 2018. PubMed PMID: 29507730; PubMed  
4  
5 Central PMCID: PMC5831208.  
6

- 7  
8 27. Sharma AK, Baliyan P, Kumar P. Air pollution and public health: the challenges for  
9  
10 Delhi, India. *Rev Environ Health*. 2018 Mar 28;33(1):77-86. doi: 10.1515/reveh-2017-  
11  
12 0032. Review. PubMed PMID: 29267177.  
13  
14 28. Bulletin of the World Health Organization 2016;94:487-488. Doi:  
15  
16 <http://dx.doi.org/10.2471/BLT.16.020716>.  
17  
18 29. Correa-Rotter R, Wesseling C, Johnson RJ. CKD of unknown origin in Central America:  
19  
20 the case for a Mesoamerican nephropathy. *Am J Kidney Dis*. 2014 Mar;63(3):506-20.  
21  
22 doi: 10.1053/j.ajkd.2013.10.062. Epub 2014 Jan 10. Review. PubMed PMID: 24412050.  
23  
24 30. Huang MJ, Wei RB, Zhao J, et al., Albuminuria and Endothelial Dysfunction in Patients  
25  
26 with Non-Diabetic Chronic Kidney Disease. *Med Sci Monit*. 2017 Sep 15;23:4447-4453.  
27  
28 PubMed PMID: 28915230; PubMed Central PMCID: PMC5612264.  
29  
30 31. Schmieder RE, Schrader J, Zidek W, Tebbe U, et al., Low-grade albuminuria and  
31  
32 cardiovascular risk : what is the evidence? *Clin Res Cardiol*. 2007 May;96(5):247-57.  
33  
34 Epub 2007 Apr 26. Review. PubMed PMID: 17453140.  
35  
36 32. Seliger SL, Salimi S, Pierre V, et al., Microvascular endothelial dysfunction is associated  
37  
38 with albuminuria and CKD in older adults. *BMC Nephrol*. 2016 Jul 13;17(1):82. doi:  
39  
40 10.1186/s12882-016-0303-x. PubMed PMID: 27412615; PubMed Central PMCID:  
41  
42 PMC4944235.  
43  
44 33. Gomes M, Begum R, Sati P, et al., Nationwide Mortality Studies To Quantify Causes Of  
45  
46 Death: Relevant Lessons From India's Million Death Study. *Health Aff (Millwood)*. 2017  
47  
48 Nov;36(11):1887-1895. doi: 10.1377/hlthaff.2017.0635. PubMed PMID: 29137507.  
49  
50  
51  
52  
53  
54  
55  
56  
57  
58  
59  
60

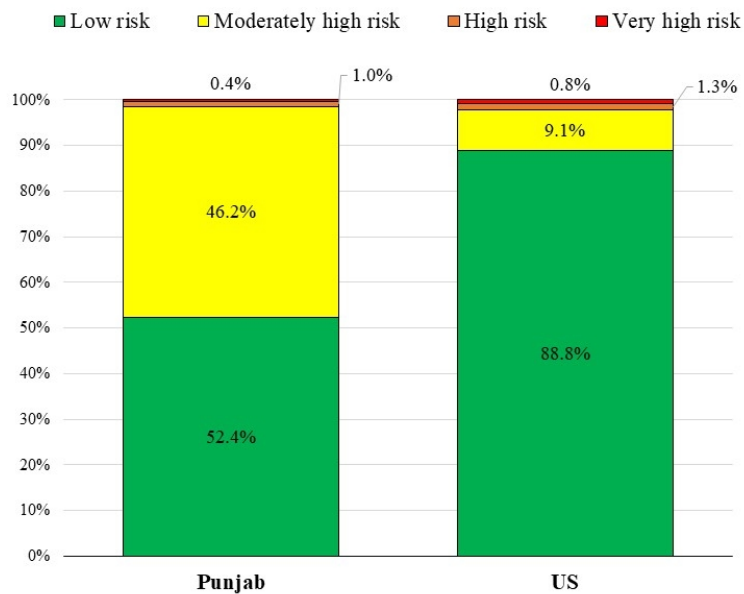

Figure 1: Distribution of KDIGO Risk Categories among Adults in Punjab, India and the United States

254x190mm (96 x 96 DPI)

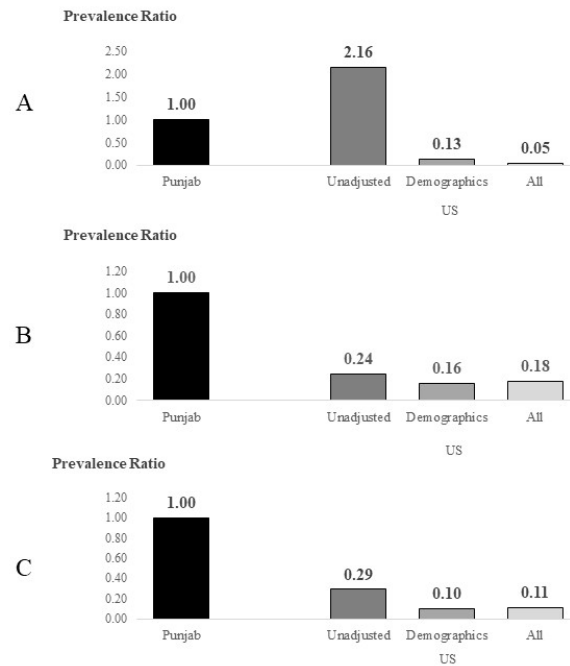

Figure 2: Changes in Prevalence Ratios between Punjab and the US for Markers of CKD with Different Levels of Adjustment for Risk Factors

A. Low eGFR

B. Albuminuria

C. Any CKD

Footnote: Demographics = age, sex, and education & All = Demographics plus measures in Table 3 (Current smoker, Hypertension, DM, CVD, Total Cholesterol, Obesity as BMI categories)

254x190mm (96 x 96 DPI)

**Supplemental Table 1: Changes in Prevalence Ratios for Low eGFR between Punjab and the US for Markers of CKD with Different Levels of Adjustment for Risk Factors**

**Unadjusted:**

| Measure         | Punjab |        |   | US   |             |         | P-value for interaction |
|-----------------|--------|--------|---|------|-------------|---------|-------------------------|
|                 | PR     | 95% CI | P | PR   | 95% CI      | P       |                         |
| US (vs. Punjab) | 1.00   | -      | - | 2.16 | 1.51 – 3.13 | <0.0001 | -                       |

**Adjusted for Demographics:**

| Measure                          | Punjab |             |         | US   |             |         | P-value for interaction |
|----------------------------------|--------|-------------|---------|------|-------------|---------|-------------------------|
|                                  | PR     | 95% CI      | P       | PR   | 95% CI      | P       |                         |
| US (vs. Punjab)                  | 1.00   | -           | -       | 0.13 | 0.02 – 0.73 | 0.02    | -                       |
| Age (per 10 years)               | 1.83   | 1.38 – 2.42 | <0.0001 | 2.61 | 2.28 – 3.03 | <0.0001 | <b>0.03</b>             |
| Male (vs. Female)                | 0.23   | 0.08 – 0.66 | 0.001   | 1.16 | 0.87 – 1.54 | 0.32    | <b>0.004</b>            |
| Education high school + (vs. no) | 1.69   | 0.80 – 3.57 | 0.17    | 1.45 | 1.01 – 2.11 | 0.047   | 0.74                    |

**Supplemental Table 2: Changes in Prevalence Ratios for Albuminuria between Punjab and the US for Markers of CKD with Different Levels of Adjustment for Risk Factors**

**Unadjusted:**

| Measure         | Punjab |        |   | US   |             |         | P-value for interaction |
|-----------------|--------|--------|---|------|-------------|---------|-------------------------|
|                 | PR     | 95% CI | P | PR   | 95% CI      | P       |                         |
| US (vs. Punjab) | 1.00   | -      | - | 0.24 | 0.22 – 0.27 | <0.0001 | -                       |

**Adjusted for Demographics:**

| Measure                          | Punjab |             |         | US   |             |         | P-value for interaction |
|----------------------------------|--------|-------------|---------|------|-------------|---------|-------------------------|
|                                  | PR     | 95% CI      | P       | PR   | 95% CI      | P       |                         |
| US (vs. Punjab)                  | 1.00   | -           | -       | 0.16 | 0.11 – 0.24 | <0.0001 | -                       |
| Age (per 10 years)               | 1.09   | 1.02 – 1.13 | <0.0001 | 1.27 | 1.19 – 1.36 | <0.0001 | <b>&lt;0.0001</b>       |
| Male (vs. Female)                | 1.05   | 0.91 – 1.13 | 0.41    | 0.78 | 0.66 – 0.93 | 0.007   | <b>0.006</b>            |
| Education high school + (vs. no) | 0.96   | 0.86 – 1.07 | 0.45    | 0.73 | 0.60 – 0.88 | 0.001   | <b>0.02</b>             |

**Supplemental Table 3: Changes in Prevalence Ratios for Any CKD between Punjab and the US for Markers of CKD with Different Levels of Adjustment for Risk Factors**

**Unadjusted:**

| Measure         | Punjab |        |   | US   |             |         | P-value for interaction |
|-----------------|--------|--------|---|------|-------------|---------|-------------------------|
|                 | PR     | 95% CI | P | PR   | 95% CI      | P       |                         |
| US (vs. Punjab) | 1.00   | -      | - | 0.29 | 0.26 – 0.32 | <0.0001 | -                       |

**Adjusted for Demographics:**

| Measure                          | Punjab |             |         | US   |             |         | P-value for interaction |
|----------------------------------|--------|-------------|---------|------|-------------|---------|-------------------------|
|                                  | PR     | 95% CI      | P       | PR   | 95% CI      | P       |                         |
| US (vs. Punjab)                  | 1.00   | -           | -       | 0.10 | 0.07 – 0.15 | <0.0001 | -                       |
| Age (per 10 years)               | 1.09   | 1.05 – 1.14 | <0.0001 | 1.42 | 1.34 – 1.51 | <0.0001 | <b>&lt;0.0001</b>       |
| Male (vs. Female)                | 1.02   | 0.91 – 1.13 | 0.76    | 0.82 | 0.71 – 0.96 | 0.01    | <b>0.03</b>             |
| Education high school + (vs. no) | 0.98   | 0.87 – 1.09 | 0.65    | 0.84 | 0.70 – 0.99 | 0.04    | 0.14                    |

STROBE Statement—Checklist of items that should be included in reports of *cross-sectional studies*

|                              | Item No | Recommendation                                                                                                                                                                                               | Page No |
|------------------------------|---------|--------------------------------------------------------------------------------------------------------------------------------------------------------------------------------------------------------------|---------|
| <b>Title and abstract</b>    | 1       | (a) Indicate the study's design with a commonly used term in the title or the abstract                                                                                                                       | 2       |
|                              |         | (b) Provide in the abstract an informative and balanced summary of what was done and what was found                                                                                                          | 2       |
| <b>Introduction</b>          |         |                                                                                                                                                                                                              |         |
| Background/rationale         | 2       | Explain the scientific background and rationale for the investigation being reported                                                                                                                         | 4       |
| Objectives                   | 3       | State specific objectives, including any prespecified hypotheses                                                                                                                                             | 4-5     |
| <b>Methods</b>               |         |                                                                                                                                                                                                              |         |
| Study design                 | 4       | Present key elements of study design early in the paper                                                                                                                                                      | 5       |
| Setting                      | 5       | Describe the setting, locations, and relevant dates, including periods of recruitment, exposure, follow-up, and data collection                                                                              | 5       |
| Participants                 | 6       | (a) Give the eligibility criteria, and the sources and methods of selection of participants                                                                                                                  | 5       |
| Variables                    | 7       | Clearly define all outcomes, exposures, predictors, potential confounders, and effect modifiers. Give diagnostic criteria, if applicable                                                                     | 7       |
| Data sources/<br>measurement | 8*      | For each variable of interest, give sources of data and details of methods of assessment (measurement). Describe comparability of assessment methods if there is more than one group                         | 7       |
| Bias                         | 9       | Describe any efforts to address potential sources of bias                                                                                                                                                    | 8       |
| Study size                   | 10      | Explain how the study size was arrived at                                                                                                                                                                    | 5       |
| Quantitative variables       | 11      | Explain how quantitative variables were handled in the analyses. If applicable, describe which groupings were chosen and why                                                                                 | NA      |
| Statistical methods          | 12      | (a) Describe all statistical methods, including those used to control for confounding                                                                                                                        | 8       |
|                              |         | (b) Describe any methods used to examine subgroups and interactions                                                                                                                                          | NA      |
|                              |         | (c) Explain how missing data were addressed                                                                                                                                                                  | NA      |
|                              |         | (d) If applicable, describe analytical methods taking account of sampling strategy                                                                                                                           | 8       |
|                              |         | (e) Describe any sensitivity analyses                                                                                                                                                                        | NA      |
| <b>Results</b>               |         |                                                                                                                                                                                                              |         |
| Participants                 | 13*     | (a) Report numbers of individuals at each stage of study—eg numbers potentially eligible, examined for eligibility, confirmed eligible, included in the study, completing follow-up, and analysed            | NA      |
|                              |         | (b) Give reasons for non-participation at each stage                                                                                                                                                         | NA      |
|                              |         | (c) Consider use of a flow diagram                                                                                                                                                                           | NA      |
| Descriptive data             | 14*     | (a) Give characteristics of study participants (eg demographic, clinical, social) and information on exposures and potential confounders                                                                     | 8-10    |
|                              |         | (b) Indicate number of participants with missing data for each variable of interest                                                                                                                          | NA      |
| Outcome data                 | 15*     | Report numbers of outcome events or summary measures                                                                                                                                                         | 9       |
| Main results                 | 16      | (a) Give unadjusted estimates and, if applicable, confounder-adjusted estimates and their precision (eg, 95% confidence interval). Make clear which confounders were adjusted for and why they were included | 12-15   |

|                          |    |                                                                                                                                                                            |       |
|--------------------------|----|----------------------------------------------------------------------------------------------------------------------------------------------------------------------------|-------|
|                          |    | (b) Report category boundaries when continuous variables were categorized                                                                                                  | NA    |
|                          |    | (c) If relevant, consider translating estimates of relative risk into absolute risk for a meaningful time period                                                           | NA    |
| Other analyses           | 17 | Report other analyses done—eg analyses of subgroups and interactions, and sensitivity analyses                                                                             | NA    |
| <b>Discussion</b>        |    |                                                                                                                                                                            |       |
| Key results              | 18 | Summarise key results with reference to study objectives                                                                                                                   | 16    |
| Limitations              | 19 | Discuss limitations of the study, taking into account sources of potential bias or imprecision. Discuss both direction and magnitude of any potential bias                 | 18    |
| Interpretation           | 20 | Give a cautious overall interpretation of results considering objectives, limitations, multiplicity of analyses, results from similar studies, and other relevant evidence | 19    |
| Generalisability         | 21 | Discuss the generalisability (external validity) of the study results                                                                                                      | 17    |
| <b>Other information</b> |    |                                                                                                                                                                            |       |
| Funding                  | 22 | Give the source of funding and the role of the funders for the present study and, if applicable, for the original study on which the present article is based              | 20-21 |

\*Give information separately for exposed and unexposed groups.

**Note:** An Explanation and Elaboration article discusses each checklist item and gives methodological background and published examples of transparent reporting. The STROBE checklist is best used in conjunction with this article (freely available on the Web sites of PLoS Medicine at <http://www.plosmedicine.org/>, Annals of Internal Medicine at <http://www.annals.org/>, and Epidemiology at <http://www.epidem.com/>). Information on the STROBE Initiative is available at [www.strobe-statement.org](http://www.strobe-statement.org).
