# Supplementary material for: Population-based comparison of chronic kidney disease prevalence and risk factors among adults living in the Punjab, Northern India and the USA (2013–2015)
Source: PubMed Central journal article supplement — BMJ Open. 2020 Dec 13;10(12):e040444. doi: 10.1136/bmjopen-2020-040444 (PMC7737106; doi:10.1136/bmjopen-2020-040444), 2020-12-13
Supplement: bmjopen-2020-040444supp001.pdf [file bmjopen-2020-040444supp001.pdf]

**Supplemental Table 1: Changes in Prevalence Ratios for Low eGFR between Punjab and the US for Markers of CKD with Different Levels of Adjustment for Risk Factors**

**Unadjusted:**

| Measure         | Punjab |        |   | US   |             |         | P-value for interaction |
|-----------------|--------|--------|---|------|-------------|---------|-------------------------|
|                 | PR     | 95% CI | P | PR   | 95% CI      | P       |                         |
| US (vs. Punjab) | 1.00   | -      | - | 2.16 | 1.51 – 3.13 | <0.0001 | -                       |

**Adjusted for Demographics:**

| Measure                          | Punjab |             |         | US   |             |         | P-value for interaction |
|----------------------------------|--------|-------------|---------|------|-------------|---------|-------------------------|
|                                  | PR     | 95% CI      | P       | PR   | 95% CI      | P       |                         |
| US (vs. Punjab)                  | 1.00   | -           | -       | 0.13 | 0.02 – 0.73 | 0.02    | -                       |
| Age (per 10 years)               | 1.83   | 1.38 – 2.42 | <0.0001 | 2.61 | 2.28 – 3.03 | <0.0001 | <b>0.03</b>             |
| Male (vs. Female)                | 0.23   | 0.08 – 0.66 | 0.001   | 1.16 | 0.87 – 1.54 | 0.32    | <b>0.004</b>            |
| Education high school + (vs. no) | 1.69   | 0.80 – 3.57 | 0.17    | 1.45 | 1.01 – 2.11 | 0.047   | 0.74                    |

**Supplemental Table 2: Changes in Prevalence Ratios for Albuminuria between Punjab and the US for Markers of CKD with Different Levels of Adjustment for Risk Factors**

**Unadjusted:**

| Measure         | Punjab |        |   | US   |             |         | P-value for interaction |
|-----------------|--------|--------|---|------|-------------|---------|-------------------------|
|                 | PR     | 95% CI | P | PR   | 95% CI      | P       |                         |
| US (vs. Punjab) | 1.00   | -      | - | 0.24 | 0.22 – 0.27 | <0.0001 | -                       |

**Adjusted for Demographics:**

| Measure                          | Punjab |             |         | US   |             |         | P-value for interaction |
|----------------------------------|--------|-------------|---------|------|-------------|---------|-------------------------|
|                                  | PR     | 95% CI      | P       | PR   | 95% CI      | P       |                         |
| US (vs. Punjab)                  | 1.00   | -           | -       | 0.16 | 0.11 – 0.24 | <0.0001 | -                       |
| Age (per 10 years)               | 1.09   | 1.02 – 1.13 | <0.0001 | 1.27 | 1.19 – 1.36 | <0.0001 | <b>&lt;0.0001</b>       |
| Male (vs. Female)                | 1.05   | 0.91 – 1.13 | 0.41    | 0.78 | 0.66 – 0.93 | 0.007   | <b>0.006</b>            |
| Education high school + (vs. no) | 0.96   | 0.86 – 1.07 | 0.45    | 0.73 | 0.60 – 0.88 | 0.001   | <b>0.02</b>             |

**Supplemental Table 3: Changes in Prevalence Ratios for Any CKD between Punjab and the US for Markers of CKD with Different Levels of Adjustment for Risk Factors**

**Unadjusted:**

| Measure         | Punjab |        |   | US   |             |         | P-value for interaction |
|-----------------|--------|--------|---|------|-------------|---------|-------------------------|
|                 | PR     | 95% CI | P | PR   | 95% CI      | P       |                         |
| US (vs. Punjab) | 1.00   | -      | - | 0.29 | 0.26 – 0.32 | <0.0001 | -                       |

**Adjusted for Demographics:**

| Measure                          | Punjab |             |         | US   |             |         | P-value for interaction |
|----------------------------------|--------|-------------|---------|------|-------------|---------|-------------------------|
|                                  | PR     | 95% CI      | P       | PR   | 95% CI      | P       |                         |
| US (vs. Punjab)                  | 1.00   | -           | -       | 0.10 | 0.07 – 0.15 | <0.0001 | -                       |
| Age (per 10 years)               | 1.09   | 1.05 – 1.14 | <0.0001 | 1.42 | 1.34 – 1.51 | <0.0001 | <b>&lt;0.0001</b>       |
| Male (vs. Female)                | 1.02   | 0.91 – 1.13 | 0.76    | 0.82 | 0.71 – 0.96 | 0.01    | <b>0.03</b>             |
| Education high school + (vs. no) | 0.98   | 0.87 – 1.09 | 0.65    | 0.84 | 0.70 – 0.99 | 0.04    | 0.14                    |
